# Supplementary material for: A Comprehensive Mass Spectrometry-Based Workflow for Clinical Metabolomics Cohort Studies
Source: Metabolites. 2022 Nov 24;12(12):1168. doi: 10.3390/metabo12121168 (PMC9782571; doi:10.3390/metabo12121168)
Supplement: Supplementary file 1 [file metabolites-12-01168-s001.zip › source data-1.csv]

	Example Description
	PP_0011289 LC-MS polar platform, ESI (+), peak number
	PN_0011296 LC-MS polar platform, ESI (-), peak number
	LP_0006570 LC-MS lipid platform, ESI (+), peak number
	LN_0002049 LC-MS lipid platform, ESI (-), peak number
	GC_1085 GC-MS platform, peak number
	RSD: realtive standard deviation
	Metabolite	RSD_raw	RSD_norm	mz_mean	Compound_Formula	Compound_Name
258	GC0018	39.99937203	17.70788847		C4H9NO3	L-Allothreonine
711	GC0039	56.47196016	39.48392187		C3H7NO2	beta-Alanine
716	GC0124	23.6834424	18.20923685		C4H9N3O2	creatine
718	GC0130|GC0439	37.20311337	16.96986621		C6H12N2O4S2	cystine
715	GC0160|GC0158	22.60748112	13.38808071		C6H13N3O3|C6H13N3O3	citrulline
766	GC0241	58.05370698	42.9484625		C5H9NO3	trans-4-hydroxy-L-proline
107	GC0247	41.80109508	65.28603593		C8H8O3	4-hydroxyphenylacetic acid
82	GC0271	18.02828867	8.59280397		C3H6O3	3-Hydroxypropionic acid
761	GC0322	50.2622767	47.42232766		C7H6O3	salicylic acid
763	GC0331	29.23550984	9.880042266		C4H6O4	succinic acid
203	GC0332|GC0333	13.24052213	10.96243682		C6H12O6|C6H12O6	D-Talose
683	GC0340	24.55328436	18.70176687		C4H10O4	Threitol
760	GC0344	29.13813391	19.5139662		C5H12O5	ribitol
702	GC0349	29.18938394	13.98224441		C3H7NO2	alanine
769	GC0353	18.98329608	9.051426977		CH4N2O	urea
706	GC0355	24.22336905	13.5655086		C5H6O5	alpha-ketoglutaric acid
229	GC0360	7.617231772	5.917066872		C6H12O6	Glucose
713	GC0365	22.42868358	27.79018421		C27H46O	cholesterol
770	GC0370	33.23471377	27.56811661		C5H4N4O3	uric acid
729	GC0387	68.27613079	25.37359124		C5H9NO4	glutamic acid
751	GC0388	22.42764132	11.3335209		C5H7NO3	oxoproline
765	GC0391|GC0390	37.58441197	20.60684074		C4H9NO3|C4H9NO3	threonine
726	GC0393	24.13896073	8.842978313		C4H4O4	fumaric acid
742	GC0394	95.36433461	29.94065224		C6H12O6	mannose
520	GC0414	27.19575673	15.64832807		C9H18O2	Pelargonic acid
743	GC0420	41.5076598	16.48405735		C5H11O2S	methionine
755	GC0427|GC0426	25.45495694	13.9443737		C9H11NO2|C9H11NO2	phenylalanine
757	GC0428	32.5030998	20.68677706		C5H9NO2	proline
762	GC0430|GC0429	26.4863709	14.47050236		C3H7NO3|C3H7NO3	serine
767	GC0431	24.14827692	15.55002415		C11H12N2O2	tryptophan
768	GC0433|GC0434	20.01782859	10.93837325		C9H11NO3	tyrosine
709	GC0437	44.40680878	13.42522113		C4H7NO4	aspartic acid
734	GC0443|GC0444	49.98549179	17.11609802		C6H9N3O4	histidine
735	GC0451	38.77414821	15.10224402		C4H7NO4	iminodiacetic acid
733	GC0455	34.44766586	12.38605273		C2H4O3	glycolic acid
731	GC0456	34.69655221	29.04627769		C3H8O3	glycerol
161	GC0457	87.58425022	28.02396642		C7H15NO3	Carnitine
66	GC0465|GC0466	24.53701285	14.65002575		C5H8O3|C5H8O3	2-keto-isovaleric acid
707	GC0468|GC0467	20.51867704	14.47556514		C6H10O3|C6H10O3	alpha-ketoisocaproic acid
160	GC0480	28.27190727	15.79645864		C10H20O2	Capric Acid
712	GC0484	248.314855	115.1655639		C12H22O11	cellobiose
31	GC0496	33.47385017	37.34202593		C6H12O5	1,5-Anhydroglucitol
89	GC0504	111.1045015	72.91500595		C4H8O3	3-hydroxybutyric acid
198	GC0514	21.81736218	11.68802422		C3H6O4	D-Glyceric acid
322	GC0541	102.6672411	29.80508925		C6H10O5	Levoglucosan
50	GC0584	35.44283526	11.78219414		C5H5NO2	2,3-Dihydroxypyridine
370	GC0604	23.06727407	25.14569908		C14H28O2	Myristic Acid
740	GC0696	62.48055875	38.60299426		C18H30O2	linolenic acid
747	GC0697	70.63201762	41.91140618		C18H34O2	oleic acid
739	GC0698	72.30075668	43.50029917		C18H32O2	linoleic acid
752	GC0699	127.8498813	102.3004301		C16H30O2	palmitoleic acid
771	GC0719|GC0352	22.1618305	16.0917336		C5H11NO2|C5H11NO2	valine
255	GC0721	33.07241304	18.96220368		C6H13NO2	Isoleucine
759	GC0826	24.80316358	13.30039921		H4O7P2	pyrophosphate
382	GC0842	27.6632383	21.38941278		C4H9NO2	N-Methyl-DL-alanine
528	GC0858	41.03031596	13.04655934		C5H5NO2	Pyrrole-2-Carboxylic Acid
737	GC0890	31.59127255	18.48321855		C6H13NO2	leucine
357	GC0894	42.72842258	51.48262861		C4H3NO2	Maleimide
749	GC0951|GC0950	67.0868192	30.57192989		C5H12N2O2|C5H12N2O2	ornithine
708	GC0958|GC0959	33.66729678	15.73721354		C4H8N2O3	asparagine
730	GC0983|GC0984|GC0985|GC0986	24.09008105	14.80367555		C5H10N2O3	glutamine
57	GC1004	33.62743458	22.88985546		C4H8O4	2-Deoxytetronic acid
758	GC1027	68.44457562	39.68417699		C4H12N2	putrescine
714	GC1029	18.82232082	14.29553437		C6H8O7	citric acid
750	GC1044	51.32684774	27.81544843		C2H2O4	oxalic acid
756	GC1045	34.0075369	12.73843994		H3O4P	phosphate
727	GC1072	36.1036839	28.94295993		C6H12O6	galactose
736	GC1075	24.35313581	10.20953767		C3H6O3	lactic acid
725	GC1077	154.9587834	74.21835073		C6H12O6	fructose
741	GC1080	38.33274239	22.12365016		C6H14N2O2	lysine
684	GC1081	36.59124119	22.68920012		C4H8O5	Threonic acid
292	GC1085	41.5272038	21.65448818		C4H6O5	L-Malic acid
745	GC1086	33.23471377	27.48951723		C6H12O6	myo-inositol
396	GC1088	21.96914013	16.02891329		C18H38O	Octadecanol
194	GC1089	28.66233087	15.44887353		C3H9O6P	D-(glycerol 1-phosphate)
151	GC1090	42.18106578	17.98418325		C3H5NO4	Aminomalonic acid
368	GC1092	30.10958468	19.35069473		C21H42O4	Monostearin
753	GC1098	22.60814499	23.37081429		C15H30O2	pentadecanoic acid
710	GC1099	18.10453774	13.92588312		C7H6O2	benzoic acid
772	GC1102	29.82696698	26.14373415		C5H10O5	xylose
529	GC1103	46.96881188	18.5579997		C3H4O3	Pyruvic acid
65	GC1105	44.93066347	28.5467292		C4H8O3	2-hydroxybutanoic acid
732	GC1106|GC0354	24.55926029	14.45109094		C2H5NO2|C2H5NO2	glycine
153	GC1183	24.81266454	15.8691091		C5H10O5	Arabinose
234	GC1319	52.75086381	40.45740563		C4H8N2O3	Glycylglycine
355	LN_000003	41.64268034	28.83101718	524.2786196	C27H44O7N1P1	LysoPE 22:6 (22:6)
133	LN_000033	86.48919904	44.48451727	279.2331345	C18H32O2	9,12-Octadecadienoic acid (18:2)
42	LN_000103	96.47966612	57.63470651	309.2801086	C20H38O2	11-Eicosenoic acid (20:1)
700	LN_000139	91.39046125	36.35512932	293.1762155	C17H26O4	[6]-Gingerol
182	LN_000195	28.25382504	21.8117763	704.6200566	C43H81O3N1	Cer 43:3 (d19:1/24:2)
135	LN_000210	100.9488415	62.99452958	253.2175266	C16H30O2	9-Hexadecenoic acid (16:1)
5	LN_000288	49.96094163	18.96675908	233.1547897	C15H22O2	(1Z,5E,9E)-5,8,8-trimethylcycloundeca-1,5,9-triene-1-carboxylic acid | 8-Isopropyl-5-methyl-3,4,6,7,8,8a-hexahydro-2-naphthalenecarboxylic acid | 2-[(2R,8S,8aR)-8,8a-Dimethyl-1,2,3,5,6,7,8,8a-octahydro-2-naphthalenyl]acrylic acid | (1R,2S,5S,8R)-7,7-Dimethyl-6-methylenetricyclo[6.2.1.0^(1,5)]undecane-2-carboxylic acid
44	LN_000517	57.99797854	44.01760762	227.2018957	C14H28O2	12-methyltridecanoic acid | Tetradecanoic acid (14:0)
171	LN_000920	30.79877196	24.19005614	680.620365	C41H81O3N1	Cer 41:1 (d18:1/23:0)-1
80	LN_000991	75.47480601	18.27816933	152.0354515	C7H7NO3	3-Hydroxyanthranilic acid
374	LN_001016	0	0.146790078	206.0823039	C11H13NO3	N-Acetyl-D-phenylalanine
494	LN_001190	33.33948056	22.53343167	778.5755343	C45H82O7N1P1	PE 40:5
495	LN_001192	34.75725373	28.31905816	776.5600957	C45H80O7N1P1	PE 40:5 | PE 40:6 -1 | PE 40:6 -2
150	LN_001225	21.04593052	13.0677015	143.0349232	C6H8O4	Allymalonic acid | trans-3-Hexenedioic acid
521	LN_001298	23.6191661	13.60577807	131.0350326	C5H8O4	Pentanedioic acid
695	LN_001344	16.7753907	6.579914489	151.06127	C5H12O5	Xylitol | Adonitol | L-(-)-Arabitol
159	LN_001415	37.20093898	0.440348932	283.0593751	C16H12O5	Calycosin
389	LN_001465	44.71803324	33.07225299	295.264493	C19H36O2	Nonadecenoic acid (19:1)
394	LN_001500	82.26417582	39.87814485	439.3795149	C27H52O4	OAHFA 27:0
97	LN_001591	5.07E-14	0.459281429	299.0204473	C15H8O7	4,5,7-trihydroxy-9,10-dioxoanthracene-2-carboxylic acid
746	LN_001640	80.73734957	44.13124384	277.2174919	C18H30O2	octadeca-6,9,12-trienoic acid (18:3) | Octadeca-9,12,15-trienoic acid (18:3)
395	LN_001699	55.66094803	36.45163217	283.2643345	C18H36O2	Octadecanoic acid (18:0)
392	LN_001704	5.83E-14	0.751058838	194.0458661	C9H9NO4	O-Hydroxyhippuric acid
419	LN_001974	17.30040796	14.46995655	830.6878546	C43H82NO8P	PC 35:2 -1
499	LN_001990	41.75178799	28.56044969	788.5240135	C45H76O8N1P1	PE 40:7
500	LN_001991	34.46052439	27.37994497	772.528968	C45H76O7N1P1	PE 40:8
464	LN_002101	45.54623379	32.62621177	716.5238059	C39H76O8N1P1	PE 34:1 -2
720	LN_002148	10.72489244	9.107149155	742.5384202	C41H78O8N1P1	dMePE 34:2
721	LN_002158	23.19537281	9.818797087	770.5691133	C43H82O8N1P1	dMePE 36:2
723	LN_002162	17.51104049	13.3131972	766.5383348	C43H78O8N1P1	dMePE 36:4
724	LN_002166	43.19384145	19.94265596	794.5697902	C45H82O8N1P1	dMePE 38:4
215	LN_002171	75.73574766	27.34668316	339.3270384	C22H44O2	Docosanoic acid (22:0)
220	LN_002178	82.35787937	46.7264138	281.248792	C18H34O2	Elaidic acid | (E)-Octadec-11-enoic acid | Octadec-6-enoic acid (18:1)
199	LN_002188	111.0533684	26.62405799	204.1241972	C9H19NO4	D-Panthenol
218	LN_002239	71.17807925	44.28798135	301.2176173	C20H30O2	Eicosa-5,8,11,14,17-pentaenoic acid (20:5)
719	LN_002256	22.51749564	11.67197425	744.5532031	C41H80O8N1P1	dMePE 34:1
241	LN_002280	61.72340397	39.29860886	255.2331752	C16H32O2	Hexadecanoic acid (16:0)
239	LN_002317	38.76901137	15.89199097	395.3894657	C26H52O2	Hexacosanoic acid (26:0)
240	LN_002318	10.84670193	20.40272942	251.2020315	C16H28O2	Hexadecadienoic acid (16:2)
217	LN_002381	75.39726136	44.65314157	305.2489318	C20H34O2	Eicosa-11,14,17-trienoic acid (20:3)
219	LN_002395	53.11948707	39.3004108	311.2959499	C20H40O2	Eicosanoic acid (20:0)
470	LN_002401	38.35034358	32.04221955	728.5597337	C41H80O7N1P1	PE 36:1
473	LN_002404	47.73682468	36.03662978	742.53969	C41H78NO8P	PE 36:2 -1
476	LN_002408	63.30596706	41.0757017	740.5239677	C41H76NO8P	PE 36:3 | PE 36:3 -3
478	LN_002420	40.26197882	35.86647786	726.5446851	C41H78O7N1P1	PE 36:3e
481	LN_002433	60.03254322	46.37516101	720.497385	C41H72O7N1P1	PE 36:6
484	LN_002446	99.01576868	32.21980946	752.5603646	C43H80O7N1P1	PE 38:3
486	LN_002464	22.6780617	12.69930742	764.5229418	C43H76NO8P	PE 38:5
488	LN_002476	44.21603149	24.32911599	764.5236788	C43H76O8N1P1	PE 38:5 -1 | PE 38:5 -2
489	LN_002484	29.1923877	28.29050854	748.5286759	C43H76O7N1P1	PE 38:6
503	LN_002524	32.64621554	34.62348467	835.5346286	C43H81O13N0P1	PI 34:1 | PI 34:1 -2
505	LN_002529	25.34122902	27.18923233	863.5655073	C45H85O13N0P1	PI 36:1 | PI 36:1
507	LN_002535	56.24674613	37.15001325	859.5342199	C45H81O13P	PI 36:3 -1
510	LN_002558	42.8282274	12.97988816	889.5812576	C47H87O13N0P1	PI 38:2
513	LN_002562	49.61970468	32.51744047	883.5341863	C47H81O13N0P1	PI 38:5
511	LN_002564	41.50784091	21.32318747	887.5650916	C47H85O13N0P1	PI 38:3 -3
514	LN_002565	31.96717649	16.23754115	913.5799723	C49H87O13N0P1	PI 40:4
515	LN_002569	33.298977	17.47067584	911.5649754	C49H85O13N0P1	PI 40:5 -2
516	LN_002604	21.78470627	26.17987484	909.5500303	C49H83O13N0P1	PI 40:6
491	LN_002665	33.56670898	30.36675357	746.5133789	C43H74O7N1P1	PE 38:7
496	LN_002713	34.32682168	33.22926673	792.5554876	C45H80O8N1P1	PE 40:5 -1
358	LN_002724	35.43674984	30.63380916	181.0718894	C6H14O6	Mannitol | Sorbitol | Galactitol
517	LN_002771	9.221364573	10.71586308	818.5926106	C44H86O10N1P1	PS 38:0
526	LN_002802	64.59396167	10.01010522	166.0511012	C8H9NO3	Pyridoxal | 2-Amino-3-methoxybenzoic acid
531	LN_002852	16.73820073	0.361412069	191.0562135	C7H12O6	Quinic acid
764	LN_002868	59.81431162	22.93979582	223.1705815	C14H24O2	tetradec-5-ynoic acid
228	LN_003028	25.69205684	15.12299986	177.0405496	C6H10O6	Gluconic acid lactone
208	LN_003325	31.73729856	17.25830483	367.1586063	C19H28O5S	Dehydroisoandrosterone-3-sulfate
226	LN_003423	34.0764487	22.71788271	758.5788522	C42H81NO10	GlcCer 34:1 (t18:1(8E)/18:0(2OH))
681	LN_003784	33.86643396	17.58012264	179.0564976	C7H8N4O2	Theophylline
502	LN_003888	7.738804347	2.991960626	773.5327077	C42H79O10P	PG 36:2 -2
224	LN_003916	58.83583084	31.1105609	153.0194938	C7H6O4	Gentisic acid | 2,3-Dihydroxybenzoic acid | 3,4-Dihydroxybenzoic acid
105	LN_003999	0.869534647	2.238385694	182.0461025	C8H9NO4	4-Pyridoxic acid
237	LN_004041	57.05812382	40.51119411	269.2488802	C17H34O2	Heptadecanoic acid (17:0)
238	LN_004162	67.52826198	46.45007401	267.233223	C17H32O2	Heptadecenoic acid (17:1) | cis-10-Heptadecenoic acid
317	LN_004308	28.68896147	18.76074866	480.3098109	C23H48O7N1P1	LdMePE 16:0
318	LN_004310	41.5068211	26.03663885	508.3410273	C25H52O7N1P1	LdMePE 18:0 -1 | LdMePE 18:0 -2
319	LN_004314	26.41332822	20.21090525	506.3253467	C25H50O7N1P1	LdMePE 18:1
320	LN_004316	39.46145482	28.41745802	504.3100231	C25H48O7N1P1	LdMePE 18:2
321	LN_004320	3.31E-14	0.298595429	528.3100028	C27H48O7N1P1	LdMePE 20:4
269	LN_004378	31.59973438	14.96147646	145.0618731	C5H10N2O3	L-Glutamine
686	LN_004530	46.50617519	22.99397278	353.3427173	C23H46O2	Tricosanoic acid (23:0)
679	LN_004541	49.51328232	29.68620461	365.3425566	C24H46O2	Tetracos-15-enoic acid (48:1)
691	LN_004552	39.2793771	13.33455159	243.0621612	C9H12N2O6	Uridine
232	LN_004646	67.54336489	9.441087262	448.3073164	C26H43NO5	Glycodeoxycholic acid | Glycochenodeoxycholic acid
738	LN_004658	29.05447388	10.96032376	329.1763362	C20H26O4	libertellenone B | 4,4prime-(2,3-Dimethyl-1,4-butanediyl)bis(2-methoxyphenol)
324	LN_004672	2.70E-14	0.293580532	255.0664969	C15H12O4	Liquiritigenin | Isoliquirtigenin
23	LN_004881	23.57021812	16.13250166	299.2019308	C20H28O2	(5xi)-12-Hydroxyabieta-8(14),9(11),12-trien-20-al | 1,4a-dimethyl-7-propan-2-yl-2,3,4,9,10,10a-hexahydrophenanthrene-1-carboxylic acid
22	LN_004897	73.14022583	39.29390268	303.2332601	C20H32O2	(5Z,8Z,11Z,14Z)-Icosatetra-5,8,11,14-enoic acid
41	LN_005053	87.94066452	46.84915832	307.264577	C20H36O2	11,14-Eicosadienoic acid (20:2)
46	LN_005069	110.4137681	51.76065155	337.3115316	C22H42O2	13-Docosenoic acid (22:1)
60	LN_005186	65.8860415	30.74437526	185.0430792	C4H8O3	2-Hydroxybutyric acid
68	LN_005261	19.19200153	0.430668286	167.0350426	C8H8O4	3,4-Dihydroxyphenylacetic acid
92	LN_005333	4.70E-14	0.624576986	391.2857447	C24H40O4	3alpha,12alpha-Dihydroxy-5beta-cholanic acid
76	LN_005365	20.04364099	12.95665886	161.0456071	C6H10O5	3-Hydroxy-3-methylglutaric acid
77	LN_005367	22.57604576	11.94364397	131.0714969	C6H12O3	3-Hydroxy-3-methylvaleric acid
98	LN_005447	74.42647493	41.57171223	327.2333022	C22H32O2	4,7,10,13,16,19-Docosahexaenoic acid (22:6)
124	LN_005747	68.85858467	19.96247778	138.0198619	C6H5NO3	6-Hydroxynicotinic acid
126	LN_005761	23.1339724	15.316971	335.0338652	C16H13ClO6	7-Chloro-2prime-hydroxy-4,6-dimethoxy-6prime-methyl-3H,4primeH-spiro[1-benzofuran-2,1prime-cyclohexa[2,5]diene]-3,4prime-dione
164	LN_005840	24.12891278	19.36353225	596.5263992	C35H69O3N1	Cer 35:1 (d18:1/17:0)-1
174	LP_000348	47.77131382	31.46265827	636.6649714	C42H85O2N1	Cer 42:0 (m18:0/24:0)
165	LP_000639	27.6037218	17.70381017	594.5818148	C38H75O3N1	Cer 38:1 (d20:1/18:0)
687	LP_000645	4.16E-14	4.288708378	150.1125053	C6H15NO3	Triethanolamine
172	LP_000676	32.44688228	23.74502038	634.6126361	C41H79O3N1	Cer 41:2 (d18:2/23:0) | Cer 41:2 (d17:1/24:1)-1
184	LP_000905	15.62850591	16.22806969	666.6174087	C45H76O2	ChE 18:2
183	LP_000914	24.13594482	18.32556508	1227.757214	C60H110O23N2	CerG3GNAc1 44:1 (d18:1/16:0)
192	LP_000921	57.69178185	39.31048951	130.0870597	C6H11NO2	Cycloleucine | Pipecolic acid
166	LP_000941	57.30403529	37.48603284	624.629166	C40H81O3N1	Cer 40:0 (d22:0/18:0)
167	LP_000943	25.27570459	25.97939937	608.6340722	C40H81O2N1	Cer 40:0 (m18:0/22:0)
180	LP_000962	31.44461118	20.89971588	646.61303	C42H79O3N1	Cer 42:3 (d18:2/24:1)
619	LP_001105	93.56604684	63.3351775	885.787819	C57H104O6	TAG 54:3 -2
177	LP_001115	42.92263205	27.46896041	648.6281874	C42H81O3N1	Cer 42:2 (d18:1/24:1)
185	LP_001120	50.00722581	47.4966927	690.6175377	C47H76O2	ChE 20:4
326	LP_001186	33.7711166	23.02599181	482.3242323	C23H48O7N1P1	LysoPC 15:0
325	LP_001190	39.89814347	32.2333711	468.3085867	C22H46O7N1P1	LysoPC 14:0
328	LP_001251	30.685087	19.72826444	496.3398468	C24H50O7N1P1	LysoPC 16:0 -3 | LysoPC 16:0 -2
327	LP_001253	31.36400973	22.55457428	482.3608866	C24H52O6N1P1	LysoPC 16:0
181	LP_001263	30.26433877	8.550733333	662.6443727	C43H85O4N1	Cer 43:1 (t17:1/26:0)
333	LP_001270	39.84147207	24.02472813	524.3713112	C26H54O7N1P1	LysoPC 18:0 -2 | LysoPC 18:0 -1
332	LP_001274	37.53942096	23.61646707	510.3921683	C26H56O6N1P1	LysoPC 18:0
621	LP_001277	50.04311263	24.93433095	898.7847408	C57H100O6	TAG 54:5
622	LP_001283	8.07074415	7.126186471	881.7548877	C57H100O6	TAG 54:5 -2
335	LP_001311	32.74618505	23.58335787	522.355651	C26H52O7N1P1	LysoPC 18:1 -2 | LysoPC 18:1 -1
334	LP_001313	35.70946167	24.72168813	508.3765238	C26H54O6N1P1	LysoPC 18:1
336	LP_001324	38.93326891	26.59518522	520.3400375	C26H50O7N1P1	LysoPC 18:2 -1 | LysoPC 18:2 -2
337	LP_001331	47.2293658	29.4567371	552.4025533	C28H58O7N1P1	LysoPC 20:0
338	LP_001333	67.02642141	35.23334615	550.38694	C28H56O7N1P1	LysoPC 20:1
339	LP_001337	54.00052932	28.88992418	548.3712613	C28H54O7N1P1	LysoPC 20:2
340	LP_001339	42.69041413	28.21226893	546.3550656	C28H52O7N1P1	LysoPC 20:3
341	LP_001358	46.00493164	32.51760935	544.3396882	C28H50O7N1P1	LysoPC 20:4 -2 | LysoPC 20:4 -1
342	LP_001360	40.24681854	30.83501862	542.3243586	C28H48O7N1P1	LysoPC 20:5
343	LP_001369	32.6217963	24.80471914	580.4329963	C30H62O7N1P1	LysoPC 22:0
344	LP_001370	74.90248404	20.66929121	578.4185227	C30H60O7N1P1	LysoPC 22:1
345	LP_001372	74.57130151	39.38026494	572.3710599	C30H54O7N1P1	LysoPC 22:4
346	LP_001374	68.83984259	34.86863234	570.3554884	C30H52O7N1P1	LysoPC 22:5 (22:5)-1
347	LP_001377	72.92513732	38.188132	570.3554898	C30H52O7N1P1	LysoPC 22:5 (22:5)-2
348	LP_001378	39.22172104	25.06775245	568.3397626	C30H50O7N1P1	LysoPC 22:6 | MePC 19:3
349	LP_001380	36.10090651	21.96875282	608.4649613	C32H66O7N1P1	LysoPC 24:0
350	LP_001386	39.5378224	21.25112682	454.2926884	C21H44O7N1P1	LysoPE 16:0 -2 | LysoPE 16:0 -1
351	LP_001391	39.2603741	22.68869301	482.3241978	C23H48O7N1P1	LysoPE 18:0 -2 | LysoPE 18:0 -1
642	LP_001393	103.5126743	56.08149592	948.8944403	C60H114O6	TAG 57:1
643	LP_001399	94.50477057	63.03453867	946.8789978	C60H112O6	TAG 57:2
352	LP_001403	47.25224414	27.9791512	480.3087885	C23H46O7N1P1	LysoPE 18:1 -2 | LysoPE 18:1 -1
353	LP_001407	53.61651134	31.62091888	478.2928934	C23H44O7N1P1	LysoPE 18:2 (18:2)-1 | LysoPE 18:2 (18:2)-2
354	LP_001412	36.88396512	24.07444088	502.2929375	C25H44O7N1P1	LysoPE 20:4 (20:4)
636	LP_001419	110.3844589	66.3425465	932.8631402	C59H110O6	TAG 56:2
637	LP_001430	78.48966334	41.18113585	930.8477122	C59H108O6	TAG 56:3
179	LP_001524	5.866990717	5.911220235	665.6546812	C42H81O3N	Cer 42:2 (d24:2/18:0)
178	LP_001526	8.231081731	12.48583212	648.6284885	C42H81O3N1	Cer 42:2 (d18:2/24:0) | Cer 42:1 (t18:1/24:0)-2
361	LP_001535	44.59810429	35.96610903	752.521872	C40H76O8N1P1	MePC 31:2
360	LP_001536	30.26710283	28.90360312	717.5535911	C39H74O7NP1	MePC 30:2
362	LP_001556	76.68439806	58.96528065	766.5727025	C42H82O7N1P1	MePC 33:2
363	LP_001580	36.30280065	24.10097088	794.6035309	C44H86O7N1P1	MePC 35:2 -1
364	LP_001594	37.52819209	25.29274667	790.5710778	C44H82O7N1P1	MePC 35:4 -1
365	LP_001612	13.61963056	7.474989081	691.5375392	C37H72O7NP1	MePC 38:2
87	LP_001647	12.01268177	5.759006839	341.1727871	C21H24O4	3-[(E)-2-(3-Hydroxy-4-methoxyphenyl)vinyl]-5-methoxy-2-(3-methyl-2-buten-1-yl)phenol
144	LP_001766	77.03194736	37.19698172	368.2794366	C21H37O4N1	AcCa 14:2
1	LP_001824	40.99547179	6.946024769	291.0837718	C15H14O6	(+)-Catechin | (-)-Epicatechin
142	LP_001890	81.62768795	35.56497793	344.2794826	C19H37O4N1	AcCa 12:0
170	LP_001908	25.42538564	22.76356745	636.6288131	C41H83O4N1	Cer 41:0 (t18:0/23:0) | Cer 41:1 (d17:1/24:0)
169	LP_001911	9.097808988	4.120174294	654.6394193	C41H83O4N1	Cer 41:0 (t16:0/25:0)
662	LP_001965	114.3913871	60.40019122	990.9411313	C63H120O6	TAG 60:1
663	LP_001968	58.99003882	39.59167707	972.8005442	C63H102O6	TAG 60:10
356	LP_002051	0.309897622	0.244769337	796.5864274	C45H78O10	MGDG 36:4
471	LP_002149	53.41472974	35.6309291	746.5691423	C41H80O8N1P1	PE 36:1 -2 | PE 36:1 -1
474	LP_002156	46.46891029	34.34528056	744.5532278	C41H78O8N1P1	PE 36:2 -2 | PE 36:2 -1
632	LP_002186	44.36150272	24.07118484	912.7980858	C58H102O6	TAG 55:5
372	LP_002192	12.00722042	4.172537825	425.1727877	C16H28N2O11	N,Nprime-Diacetylchitobiose
618	LP_002223	45.75429201	21.94193043	902.8161565	C57H104O6	TAG 54:3 | TAG 54:3 -1
620	LP_002226	36.50007155	17.03567414	900.8003986	C57H102O6	TAG 54:4
373	LP_002237	23.88621927	14.56254598	244.0792511	C8H15NO6	N-Acetyl-D-mannosamine
654	LP_002292	56.30991146	37.59575651	948.7996319	C61H102O6	TAG 58:8
675	LP_002314	27.10943851	28.51282289	1012.925927	C65H118O6	TAG 62:4
625	LP_002328	83.99059576	41.23556841	894.7534667	C57H96O6	TAG 54:7 -1 | TAG 54:7 -2
624	LP_002330	100.2765277	42.01077994	894.7535822	C57H96O6	TAG 54:7
659	LP_002347	43.92284999	33.80107727	970.8792777	C62H112O6	TAG 59:4
661	LP_002350	7.528813008	0.356633525	964.831893	C62H106O6	TAG 59:7
660	LP_002351	18.6365939	27.2339681	968.8608424	C62H110O6	TAG 59:5
626	LP_002359	89.403191	43.43986148	892.7376996	C57H94O6	TAG 54:8
688	LP_002446	34.16273199	17.42303166	182.0813416	C9H11NO3	Tyrosine | 3-Amino-3-(4-hydroxyphenyl)propanoate
330	LP_002767	35.89017606	23.28245617	510.3556792	C25H52O7N1P1	LysoPC 17:0
329	LP_002769	35.57539071	24.28135131	494.3242451	C24H48O7N1P1	LysoPC 16:1
331	LP_002771	24.40279379	21.70683881	508.3399379	C25H50O7N1P1	LysoPC 17:1
634	LP_002793	113.1208495	65.47503694	936.8946114	C59H114O6	TAG 56:0
635	LP_002796	147.9838311	83.080424	934.8786471	C59H112O6	TAG 56:1
664	LP_002852	149.0483272	70.56941944	988.9255596	C63H118O6	TAG 60:2
676	LP_002878	1.72E-14	0.173448425	1010.910356	C65H116O6	TAG 62:5
677	LP_002882	34.21447712	13.97017563	1008.894681	C65H114O6	TAG 62:6
655	LP_002998	71.68870642	37.31351696	946.7842256	C61H100O6	TAG 58:9
656	LP_002999	41.05961201	18.752541	976.9258224	C62H118O6	TAG 59:1
657	LP_003000	88.74829039	57.44629046	974.9102145	C62H116O6	TAG 59:2
658	LP_003005	85.97896222	51.19967683	972.8946249	C62H114O6	TAG 59:3
630	LP_003099	61.76397965	33.87641709	916.8320331	C58H106O6	TAG 55:3
631	LP_003102	58.66810998	31.06190073	914.8162302	C58H104O6	TAG 55:4
397	LP_003137	62.29186498	3.763803072	130.1599092	C8H19N	Octylamine
748	LP_003145	50.1077741	1.435578722	160.133249	C8H17NO2	omega-Aminocaprylic acid
458	LP_003190	43.73316233	27.74656121	870.6935786	C50H96NO8P	PC 42:2
398	LP_003219	49.96275548	15.795724	548.3345359	C27H50O8N1P1	PC 19:2
399	LP_003221	53.1709723	20.5314969	572.3348688	C29H50O8N1P1	PC 21:4 | MePC 18:1
400	LP_003223	40.85446263	40.0402926	706.5369751	C38H76O8N1P1	PC 30:0
402	LP_003229	16.56130847	16.47921684	734.5690248	C40H80O8N1P1	PC 32:0 -2 | PC 32:0 -1
404	LP_003231	36.58004513	34.91037411	732.5527101	C40H78NO8P	PC 32:1 | PC 32:1 -1 | PC 32:1 -2
401	LP_003233	23.19107864	17.74248162	720.5894226	C40H82O7N1P1	PC 32:0
403	LP_003241	23.3323758	17.13052254	718.5735156	C40H80O7N1P1	PC 32:1
405	LP_003245	40.51112624	33.37588134	730.5373912	C40H76O8N1P1	PC 32:2 -2 | PC 32:2 -1
407	LP_003247	27.93414869	22.90455181	746.5687101	C41H80O8N1P1	PC 33:1 -2 | PC 33:1 -1
406	LP_003248	15.81874481	23.2126514	728.5216492	C40H74NO8P	PC 32:3 | MePC 29:0
408	LP_003250	30.21568347	25.50485584	744.5528741	C41H78O8N1P1	PC 33:2
409	LP_003268	27.78626793	20.1887301	748.6207613	C42H86O7N1P1	PC 34:0
411	LP_003289	35.9610616	12.64968507	746.6044639	C42H84O7N1P1	PC 34:1
414	LP_003332	12.16502943	11.48485641	758.5690996	C42H80O8N1P1	PC 34:2 -2
413	LP_003338	22.12237406	21.24059743	744.5892286	C42H82O7N1P1	PC 34:2
648	LP_003342	156.3919426	77.31255475	960.8943346	C61H114O6	TAG 58:2
646	LP_003352	52.46467716	15.56438521	964.9266644	C61H118O6	TAG 58:0
647	LP_003353	158.0633981	83.77997837	962.9099695	C61H116O6	TAG 58:1
416	LP_003361	82.60069937	49.84154417	756.5525387	C42H78O8N1P1	PC 34:3 -2
415	LP_003367	25.6201802	18.87738381	742.573719	C42H80O7N1P1	PC 34:3 | MePC 33:1 -2
417	LP_003370	44.18942837	34.85340138	754.5372838	C42H76O8N1P1	PC 34:4
420	LP_003382	19.45300892	13.83273118	772.583948	C43H82O8N1P1	PC 35:2 -2
418	LP_003384	43.70365759	21.55143963	774.5999905	C43H84O8N1P1	PC 35:1 -2 | PC 35:1 -1
422	LP_003392	23.94941782	21.54282524	788.6160615	C44H86O8N1P1	PC 36:1 -2 | PC 36:1 -1 | MePC 35:1 -1
421	LP_003394	72.57817504	29.05728787	774.6364135	C44H88O7N1P1	PC 36:1
423	LP_003398	42.11212421	28.96135186	772.6208925	C44H86O7N1P1	PC 36:2
424	LP_003416	14.40480469	10.65088483	786.6001787	C44H84NO8P	PC 36:2 | PC 36:2 -2
425	LP_003425	27.58388032	23.91628027	770.6049275	C44H84O7N1P1	PC 36:3
427	LP_003434	38.30398821	26.40615605	768.589551	C44H82O7N1P1	PC 36:4 -2 | MePC 35:4 -2
429	LP_003436	17.66359165	15.18125277	782.5685383	C44H80O8N1P1	PC 36:4 -3
426	LP_003439	27.9492668	22.61990083	766.5739479	C44H80O7N1P1	PC 36:4 | PC 36:5
428	LP_003446	44.05072275	33.46348766	782.5687762	C44H80O8N1P1	PC 36:4 -2 | PC 36:4 -1
430	LP_003527	44.26800961	29.50010258	780.5522126	C44H78O8N1P1	PC 36:5 | PC 36:5 -1
431	LP_003529	54.30222164	39.58898336	780.5526955	C44H78NO8P	PC 36:5 | PC 36:5 -2
432	LP_003534	50.50273002	37.55207634	778.5373384	C44H76O8N1P1	PC 36:6
433	LP_003537	2.831014369	0.565486585	778.5376102	C44H76NO8P	PC 36:6
434	LP_003543	21.73490357	20.4227739	800.615627	C45H86O8N1P1	PC 37:2
435	LP_003547	27.53072682	24.31108332	796.5840263	C45H82O8N1P1	PC 37:4
436	LP_003549	32.94458463	29.58736055	792.5525199	C45H78O8N1P1	PC 37:6
651	LP_003558	52.59147606	38.93093235	954.8474353	C61H108O6	TAG 58:5
438	LP_003563	39.03363056	22.29158729	814.6311744	C46H88O8N1P1	PC 38:2
437	LP_003564	104.141326	51.57837507	816.6469735	C46H90NO8P	PC 38:1 | PC 38:1
439	LP_003587	41.13201037	25.10781137	812.6158342	C46H86O8N1P1	PC 38:3 -1
442	LP_003595	24.97268139	23.91122415	810.5970987	C46H84O8N1P1	PC 38:4 -2
440	LP_003599	35.465299	26.80102394	796.6205621	C46H86O7N1P1	PC 38:4
441	LP_003600	20.3956913	16.20438544	810.6000563	C46H84O8N1P1	PC 38:4 -1
443	LP_003604	27.6431701	18.21999911	808.5831211	C46H82NO8P	PC 38:5
444	LP_003607	29.04399025	19.28587615	794.6046801	C46H84O7N1P1	PC 38:5
445	LP_003618	33.27603984	27.39712734	794.6052527	C46H84O7N1P1	PC 38:5 -2
448	LP_003627	43.88308542	36.87294117	804.5528123	C46H78O8N1P1	PC 38:7 -1
447	LP_003628	27.79771048	23.90754917	792.589903	C46H82O7N1P1	PC 38:6 | MePC 35:3
446	LP_003630	18.57358405	15.56572482	806.5689187	C46H80O8N1P1	PC 38:6
449	LP_003635	67.70278408	29.95696552	824.6104547	C47H86O8N1P1	PC 39:4
450	LP_003638	32.27939879	21.2697321	820.5836549	C47H82O8N1P1	PC 39:6
451	LP_003648	26.44116884	23.53013062	840.6467597	C48H90O8N1P1	PC 40:3
638	LP_003652	57.18732597	27.08747253	928.8318652	C59H106O6	TAG 56:4
639	LP_003662	51.96353709	32.83854255	926.816225	C59H104O6	TAG 56:5
455	LP_003667	39.58482274	25.77700199	836.6152793	C48H86O8N1P1	PC 40:5 -2
454	LP_003669	40.11395531	23.46773497	836.6146366	C48H86O8N1P1	PC 40:5 -1
452	LP_003670	35.7310433	25.20016009	824.6516839	C48H90O7N1P1	PC 40:4
453	LP_003672	34.56279751	27.37094292	822.6359244	C48H88O7N1P1	PC 40:5
55	LP_004119	15.5529283	0.943520199	356.2795364	C20H34O4	2-(2-Hydroxy-3-buten-2-yl)-3a,6,6,9a-tetramethyldodecahydronaphtho[2,1-b]furan-4,5-diol
62	LP_004264	38.86675969	18.446099	136.0756057	C8H9NO	2-Phenylacetamide
73	LP_004323	2.62E-14	0.193777736	333.030326	C14H14Cl2O5	3-(3,3-dichloro-2-hydroxypropyl)-6,8-dimethoxyisochromen-1-one
100	LP_004497	26.69517758	9.751752816	152.0707071	C8H9NO2	4-(Methylamino)benzoic acid
111	LP_004652	21.02580746	15.53630611	419.098672	C20H18O10	5,7-dihydroxy-2-(4-hydroxyphenyl)-3-[(2S,3R,4S,5S)-3,4,5-trihydroxyoxan-2-yl]oxychromen-4-one
132	LP_004814	16.35830625	1.160948331	291.1207926	C16H20O6	8-(2,3-Dihydroxy-3-methylbutyl)-5,7-dimethoxy-2H-chromen-2-one
137	LP_004862	91.99892185	42.43030536	316.2482414	C17H33O4N1	AcCa 10:0
140	LP_004867	55.22381691	21.22129542	310.2012237	C17H27O4N1	AcCa 10:3
138	LP_004869	76.87981421	27.20433824	314.232603	C17H31O4N1	AcCa 10:1
139	LP_004871	17.28575022	0.626997722	312.2170167	C17H29O4N1	AcCa 10:2
141	LP_004876	13.25988321	7.739434172	308.1832518	C17H25O4N1	AcCa 10:4
143	LP_004884	39.73908631	5.148770841	336.2145341	C19H29O4N1	AcCa 12:4
152	LP_004990	4.10E-14	10.65950881	138.0551225	C7H7NO2	Anthranilic acid
158	LP_005129	27.9276144	15.55249909	195.0878398	C8H10N4O2	Caffeine
162	LP_005203	18.87289212	13.86793814	538.5190518	C34H67NO3	Cer 34:1 (d18:1/16:0)
168	LP_005276	28.46108483	21.22795629	622.613207	C40H79O3N1	Cer 40:1 (d16:1/24:0)-1
175	LP_005281	95.07102786	59.67194518	650.6442807	C42H83O3N1	Cer 42:1 (d18:0/24:1)
176	LP_005283	31.96439213	22.32726442	650.6441452	C42H83O3N1	Cer 42:1 (d18:1/24:0)-3
206	LP_005353	96.7264908	34.93161088	641.5115007	C39H70O5	DAG 36:3 | DAG 36:3 -3
205	LP_005354	52.5258221	24.46513395	636.5562406	C39H70O5	DAG 36:3 | DAG 36:3 -2
213	LP_005395	63.03779325	11.65536724	393.2091354	C22H29FO5	Dexamethasone
722	LP_005453	15.49711724	5.215900344	770.5650726	C43H80O8N1P1	dMePE 36:3
216	LP_005460	2.10E-14	0.370603702	228.2686305	C15H34N+	Dodecyltrimethylammonium
644	LP_005548	73.72305477	46.65871948	944.8643139	C60H110O6	TAG 57:3
645	LP_005552	74.2929349	41.03384519	942.8485408	C60H108O6	TAG 57:4
456	LP_005559	30.62395381	29.84837954	820.6204979	C48H86O7N1P1	PC 40:6
457	LP_005566	29.61614399	23.03447652	818.6038065	C48H84O7N1P1	PC 40:7
459	LP_005577	13.94375687	6.048368414	868.6789706	C50H94NO8P	PC 42:3
460	LP_005580	39.65537762	26.53098066	866.662483	C50H92NO8P	PC 42:4
461	LP_005582	1.35E-14	1.782156233	690.5070235	C37H72NO8P	PE 32:1
463	LP_005588	47.3537522	34.26878421	718.5374322	C39H76NO8P	PE 34:1 -1
462	LP_005589	30.13793593	23.94377722	702.5427296	C39H76O7N1P1	PE 34:1
465	LP_005593	40.66725018	35.63756787	700.5269334	C39H74O7N1P1	PE 34:2 | PE 34:3
466	LP_005595	43.72479405	32.78981606	716.5217185	C39H74O8N1P1	PE 34:2 -2
467	LP_005596	22.86943719	22.94114273	714.5068168	C39H72NO8P	PE 34:3
468	LP_005602	46.80723967	25.85342192	730.5367172	C40H76NO8P	PE 35:2
469	LP_005607	41.72521302	42.50987256	728.5194776	C40H74NO8P	PE 35:3
472	LP_005618	38.08585717	34.20874203	728.5581055	C41H78O7N1P1	PE 36:2
477	LP_005624	60.69185185	37.94635084	742.5365513	C41H76NO8P	PE 36:3 -2
475	LP_005630	32.9510749	28.61839388	726.5427374	C41H76O7N1P1	PE 36:3
479	LP_005632	21.82716995	20.62164569	740.522046	C41H74O8N1P1	PE 36:4
480	LP_005638	27.48903457	25.28846547	724.5270581	C41H74O7N1P1	PE 36:4 | PE 36:5
483	LP_005651	32.82830206	25.25837995	756.5893998	C43H82O7N1P1	PE 38:2 | PE 38:3
482	LP_005654	0	1.095921172	772.5835771	C43H82NO8P	PE 38:2
485	LP_005674	25.29788946	24.41594054	752.5583149	C43H78O7N1P1	PE 38:4
487	LP_005687	34.50726589	27.09714801	750.5432075	C43H76O7N1P1	PE 38:5
490	LP_005692	31.04961188	24.58850797	748.5267151	C43H74O7N1P1	PE 38:6 | PE 38:5 -2
492	LP_005701	32.59836821	21.11991631	780.5893177	C45H82O7N1P1	PE 40:4
493	LP_005708	22.01380242	12.24162588	794.565912	C45H80NO8P	PE 40:5
497	LP_005710	32.46333491	28.97233405	778.5737726	C45H80O7N1P1	PE 40:5 -1 | PE 40:5 -2
627	LP_005725	50.92438647	10.28308726	922.8787219	C58H112O6	TAG 55:0
498	LP_005733	31.28470358	28.69859335	776.5582642	C45H78O7N1P1	PE 40:6
501	LP_005750	24.99458133	21.21725793	804.5895329	C47H82O7N1P1	PE 42:6
652	LP_005759	54.82901301	28.75508735	952.8320889	C61H106O6	TAG 58:6
653	LP_005765	46.6749391	34.48076179	950.8150303	C61H104O6	TAG 58:7
504	LP_005951	26.53534157	25.31767373	852.5586286	C43H79O13N0P1	PI 34:2 -2
506	LP_006090	22.85217042	17.44954395	880.5898749	C45H83O13N0P1	PI 36:2 -2
508	LP_006103	35.87827861	28.59453799	876.5586207	C45H79O13N0P1	PI 36:4
509	LP_006194	20.30958335	14.25104389	890.5745798	C46H81O13N0P1	PI 37:4
512	LP_006197	21.1342156	11.77618022	904.5893284	C47H83O13N0P1	PI 38:4
649	LP_006201	136.7379428	75.67556199	958.8787681	C61H112O6	TAG 58:3
650	LP_006207	112.2800596	59.04905489	956.8632359	C61H110O6	TAG 58:4
522	LP_006233	126.5000152	89.7948714	286.1437132	C17H19NO3	Piperine
696	LP_006326	33.87348251	12.26952013	289.1409668	C15H22O4	Zinniol
527	LP_006387	36.04658186	20.76957208	130.0506955	C5H7NO3	Pyroglutamic acid
557	LP_006488	1.61E-14	35.61415253	177.1023953	C10H12N2O	Serotonin
536	LP_006493	27.40746556	19.55583964	675.5433312	C37H75O6N2P1	SM 32:1 (d16:1/16:0)
537	LP_006500	18.1837582	14.5787473	703.5745592	C39H79O6N2P1	SM 34:1 (d18:1/16:0)
538	LP_006503	74.9481079	5.996968087	719.5687901	C39H79O7N2P1	SM 34:1 (t18:0/16:1)-1 | SM 34:1 (t18:0/16:1)-2
539	LP_006505	37.41947942	30.06780318	697.5247801	C39H73O6N2P1	SM 34:4 (d14:0/20:4)
540	LP_006509	23.74602828	23.50690884	711.5403757	C40H75O6N2P1	SM 35:4 (d17:1/18:3)
541	LP_006512	27.55513496	22.90989366	727.5718322	C41H79O6N2P1	SM 36:3 (d18:2/18:1)
633	LP_006516	49.1897541	26.73225038	910.7856354	C58H100O6	TAG 55:6 | TAG 55:6
543	LP_006521	42.38192839	32.5939852	725.5584317	C41H77O6N2P1	SM 36:4 (d18:2/18:2)
542	LP_006522	9.754414197	6.773652186	725.5551816	C41H77O6N2P1	SM 36:4 (d18:1/18:3)
544	LP_006525	28.44747062	22.32499388	723.540091	C41H75O6N2P1	SM 36:5 (d18:1/18:4)
545	LP_006531	16.68769615	15.31832501	757.6210546	C43H85O6N2P1	SM 38:2 (d20:1/18:1) | SM 38:2 (d18:2/20:0)
546	LP_006533	25.52015468	18.8286871	753.5871684	C43H81O6N2P1	SM 38:4 (d18:1/20:3)
547	LP_006536	18.31667661	18.7997886	751.5714751	C43H79O6N2P1	SM 38:5 (d18:2/20:3)
548	LP_006537	26.0458093	19.63786429	787.6682557	C45H91O6N2P1	SM 40:1 (d18:1/22:0)
549	LP_006538	32.24685889	23.55397562	785.6525675	C45H89O6N2P1	SM 40:2 (d16:1/24:1)
550	LP_006543	22.91579227	17.60761581	801.6831739	C46H93O6N2P1	SM 41:1 (d18:1/23:0)
551	LP_006545	28.614488	21.79254238	799.6682306	C46H91O6N2P1	SM 41:2 (d18:1/23:1)
553	LP_006563	38.16667918	24.90179045	813.683837	C47H93O6N2P1	SM 42:2 (d18:1/24:1)-2
552	LP_006567	29.22019986	18.75748681	815.6994473	C47H95O6N2P1	SM 42:1 (d18:1/24:0)
554	LP_006568	35.30899278	24.63528071	811.6679815	C47H91O6N2P1	SM 42:3 (d18:1/24:2)
555	LP_006570	40.30653038	24.65810409	809.6521785	C47H89O6N2P1	SM 42:4 (d18:2/24:2)
410	LP_006642	34.57756088	19.85493923	742.5714281	C42H82O8N1P1	PC 34:1
412	LP_006644	14.26228968	13.10768264	760.5849008	C42H82NO8P	PC 34:1 -1
673	LP_006690	86.13543057	30.72830336	1016.957258	C65H122O6	TAG 62:2
674	LP_006691	68.54342129	49.17492677	1014.941729	C65H120O6	TAG 62:3
665	LP_006709	127.5572029	67.78374341	986.9104498	C63H116O6	TAG 60:3
560	LP_007219	1.51E-14	3.628365147	682.5975821	C41H76O6	TAG 38:1
561	LP_007221	22.00623713	11.19202005	627.5340689	C41H72O5	TAG 38:4
562	LP_007291	43.37820929	4.613741172	710.6284176	C43H80O6	TAG 40:1
563	LP_007295	1.33E-14	4.486649732	708.6131242	C43H78O6	TAG 40:2
564	LP_007329	113.0270232	92.49536283	740.6754342	C45H86O6	TAG 42:0
565	LP_007333	111.7219521	59.69491982	736.6444793	C45H82O6	TAG 42:2
566	LP_007335	4.703345023	4.263083074	699.5949279	C45H80O6	TAG 42:3
669	LP_007362	46.0715288	31.61724537	974.8155757	C63H104O6	TAG 60:9
671	LP_007364	15.71859917	19.47133663	1000.925688	C64H118O6	TAG 61:3
670	LP_007367	6.779803185	4.548993711	1002.941415	C64H120O6	TAG 61:2
623	LP_007374	54.82676972	36.02116659	896.769321	C57H98O6	TAG 54:6
640	LP_007379	42.69903014	27.68876978	924.8003691	C59H102O6	TAG 56:6
173	LP_007395	53.44913414	37.84485467	652.6605282	C42H85O3N1	Cer 42:0 (d18:0/24:0)-1 | Cer 42:0 (d18:0/24:0)-2 | Cer 42:0 (d18:0/24:0)-3
567	LP_007398	60.33776025	8.181341632	754.6907105	C46H88O6	TAG 43:0
568	LP_007399	1.52E-14	10.12408955	752.6736632	C46H86O6	TAG 43:1
569	LP_007410	129.9209531	108.0364775	766.691033	C47H88O6	TAG 44:1
570	LP_007415	132.4904833	104.6996001	764.6756991	C47H86O6	TAG 44:2
571	LP_007421	88.41320193	57.15591235	782.7234706	C48H92O6	TAG 45:0
572	LP_007436	40.95433636	31.06018458	776.6755977	C48H86O6	TAG 45:3
573	LP_007443	123.007739	107.773711	796.7382069	C49H94O6	TAG 46:0
574	LP_007452	127.0052351	100.4939647	790.6910005	C49H88O6	TAG 46:3
575	LP_007454	110.6936069	75.72460757	788.6753162	C49H86O6	TAG 46:4
576	LP_007456	93.04442984	78.96793419	810.7551882	C50H96O6	TAG 47:0
577	LP_007474	73.00947181	46.41976817	804.7070169	C50H90O6	TAG 47:3
578	LP_007476	2.118348915	1.406235582	802.6914299	C50H88O6	TAG 47:4
579	LP_007481	117.2870799	87.67960642	824.7694716	C51H98O6	TAG 48:0
668	LP_007488	43.22641731	30.63282404	976.828882	C63H106O6	TAG 60:8
667	LP_007492	94.65474266	35.47276681	978.8482502	C63H108O6	TAG 60:7
580	LP_007495	115.57384	76.55049281	822.7535846	C51H96O6	TAG 48:1
581	LP_007498	101.7751928	64.61351468	820.7379901	C51H94O6	TAG 48:2
582	LP_007506	95.55571336	62.91819752	818.7223263	C51H92O6	TAG 48:3
583	LP_007524	95.02290914	64.46970094	816.7066155	C51H90O6	TAG 48:4
584	LP_007528	110.4224633	79.75330733	838.7850264	C52H100O6	TAG 49:0
585	LP_007532	96.92771036	64.485786	836.7695494	C52H98O6	TAG 49:1
586	LP_007536	94.99070833	55.55130011	834.7537243	C52H96O6	TAG 49:2
587	LP_007539	90.71643	48.50776142	832.7377348	C52H94O6	TAG 49:3
588	LP_007542	3.88E-14	0.124951092	828.7071447	C52H90O6	TAG 49:5
589	LP_007547	112.9862867	80.2428727	852.800974	C53H102O6	TAG 50:0
672	LP_007555	6.06E-14	5.487497061	998.9107619	C64H116O6	TAG 61:4
233	LP_007592	40.38840466	23.78908984	223.1077863	C11H14N2O3	Glycyl-L-phenylalanine
591	LP_007619	70.89991947	42.12648406	848.7695268	C53H98O6	TAG 50:2
590	LP_007621	81.83170155	51.43062476	850.7852053	C53H100O6	TAG 50:1 -2 | TAG 50:1 -1
592	LP_007652	73.23113246	36.29553059	846.7537939	C53H96O6	TAG 50:3
628	LP_007658	84.89203594	56.56555083	920.8639238	C58H110O6	TAG 55:1
629	LP_007664	75.26081395	46.31453919	918.8474235	C58H108O6	TAG 55:2
245	LP_007684	3.42E-14	0.105478723	452.192616	C22H26O9	IUPAC
246	LP_008350	5.573854984	3.823271663	253.0951386	C10H12N4O4	IUPAC | 2prime-Deoxyinosine
593	LP_008420	82.59625378	44.01053021	844.7381986	C53H94O6	TAG 50:4
666	LP_008431	98.2554134	55.97145254	984.8957732	C63H114O6	TAG 60:4
594	LP_008442	88.37838275	60.18790833	842.7222104	C53H92O6	TAG 50:5 -3 | TAG 50:5 -1
595	LP_008447	0.208378407	1.645264781	840.7065022	C53H90O6	TAG 50:6
596	LP_008451	2.11E-14	1.626931772	838.6905856	C53H88O6	TAG 50:7
597	LP_008454	111.9310559	75.36510638	866.8165286	C54H104O6	TAG 51:0
598	LP_008456	93.95622921	58.98901317	864.80084	C54H102O6	TAG 51:1
599	LP_008470	83.95949595	43.4523424	862.7851116	C54H100O6	TAG 51:2
600	LP_008472	76.24876168	35.67655314	860.7694	C54H98O6	TAG 51:3
601	LP_008484	75.07735165	37.55954989	858.7538998	C54H96O6	TAG 51:4 | TAG 51:4 -1
602	LP_008496	96.99797032	39.1650934	856.7376556	C54H94O6	TAG 51:5
25	LP_008500	20.46745694	16.4534184	297.1462835	C19H20O3	(E)-1,7-bis(4-hydroxyphenyl)hept-1-en-3-one | 7-[(2E,5E)-7-hydroxy-3,7-dimethylocta-2,5-dienoxy]chromen-2-one
603	LP_008513	110.9925468	74.72780889	880.8324833	C55H106O6	TAG 52:0
604	LP_008517	85.26796365	57.80289479	878.8165977	C55H104O6	TAG 52:1
605	LP_008521	45.64556987	24.6130479	876.8009534	C55H102O6	TAG 52:2
606	LP_008528	34.80010899	17.25217632	874.7855085	C55H100O6	TAG 52:3
607	LP_008542	43.53922694	23.0783791	872.7696267	C55H98O6	TAG 52:4 | TAG 52:4 -2 | TAG 52:4 -1
608	LP_008570	65.60611688	29.92812614	870.7538291	C55H96O6	TAG 52:5 | TAG 52:5 -1
641	LP_008594	88.589501	47.84323235	920.7684714	C59H98O6	TAG 56:8
609	LP_008600	81.41674785	48.17552292	894.8481482	C56H108O6	TAG 53:0
610	LP_008602	93.7213338	62.19802004	892.8312486	C56H106O6	TAG 53:1
611	LP_008606	76.18463904	39.3147369	890.8160769	C56H104O6	TAG 53:2
612	LP_008608	68.18832546	31.75993154	888.8005821	C56H102O6	TAG 53:3
613	LP_008616	64.42926022	30.86185746	886.7850252	C56H100O6	TAG 53:4
614	LP_008618	71.22194948	32.39174085	884.7689162	C56H98O6	TAG 53:5
615	LP_008642	131.1230512	92.97878699	908.8655928	C57H110O6	TAG 54:0
616	LP_008644	96.704336	68.01343811	906.8473855	C57H108O6	TAG 54:1
617	LP_008650	69.94131926	39.31511992	904.832007	C57H106O6	TAG 54:2 | TAG 54:2 -2 | TAG 54:2 -1
163	LP_008670	23.20850816	15.7509695	536.5039192	C34H67O4N1	Cer 34:1 (t18:1/16:0)
4	PN_000260	2.16E-14	0.327089679	505.2128331	C25H32O8	(1S,5aR,5bR,6aS,9S,9aS,11S,11bR)-9-(3-Furyl)-1,11-dihydroxy-1,3,3,5a,9a,11b-hexamethyldecahydro[2]benzofuro[5,4-f]oxireno[d]isochromene-5,7(3H,6aH)-dione
71	PN_000702	25.55817215	0.578919301	329.1760093	C20H26O4	3-(2,5-dihydroxy-6-methyl-3-propan-2-ylphenyl)-2-methyl-5-propan-2-ylbenzene-1,4-diol
12	PN_001606	17.56283163	0.409384467	461.0730205	C21H18O12	(2S,3S,4S,5R,6S)-6-[5,7-dihydroxy-2-(4-hydroxyphenyl)-4-oxochromen-3-yl]oxy-3,4,5-trihydroxyoxane-2-carboxylic acid
10	PN_001864	16.56401311	0.317748414	375.1298749	C15H22O8	(2S,3R,4S,5S,6R)-2-[[(1S,4aR,7aS)-7-(hydroxymethyl)-1,4a,5,7a-tetrahydrocyclopenta[c]pyran-1-yl]oxy]-6-(hydroxymethyl)oxane-3,4,5-triol
125	PN_002288	1.62E-14	0.230811668	809.4338754	C42H66O15	6-[[(2R,3R,6aR,6bS,8aS,12aS,14bR)-2-hydroxy-4,4,6a,6b,11,11,14b-heptamethyl-8a-[3,4,5-trihydroxy-6-(hydroxymethyl)oxan-2-yl]oxycarbonyl-1,2,3,4a,5,6,7,8,9,10,12,12a,14,14a-tetradecahydropicen-3-yl]oxy]-3,4,5-trihydroxyoxane-2-carboxylic acid
64	PN_002889	5.78E-14	0.081154096	319.0801407	C16H16O7	2-hydroxy-6-[2-hydroxy-6-(hydroxymethyl)-4-methoxyphenoxy]-4-methylbenzoic acid
118	PN_003784	0.629288821	0.103276898	479.265339	C26H40O8	5-[(16,17-Dihydroxy-3-oxokauran-18-yl)oxy]-3-hydroxy-3-methyl-5-oxopentanoic acid
53	PN_004317	2.92E-14	0.103970633	441.155974	C24H26O8	2,5a,11,11,13a-Pentamethyl-5a,6,6a,13a,13b,13c-hexahydro-9H-spiro[furo[4,3,2-ij]pyrano[4prime,3prime:4,5]cyclohepta[1,2-f]isochromene-7,2prime-oxirane]-1,5,9,13(2H,3aH,11H)-tetrone
699	PN_004329	18.50853918	9.39660704	478.1667179	C23H28ClNO5	[(7R)-5-chloro-3-[(1E,3E,5S)-3,5-dimethylhepta-1,3-dienyl]-2-(2-hydroxyethyl)-7-methyl-6,8-dioxoisoquinolin-7-yl] acetate
54	PN_004474	1.57E-14	23.37695072	189.0879291	C7H14N2O4	2,6-Diaminopimelic acid
49	PN_004546	3.65E-14	22.38235632	153.0193375	C7H6O4	2,3-Dihydroxybenzoic acid
61	PN_004636	1.51E-14	1.494889885	151.0401037	C8H8O3	2-Hydroxyphenylacetic acid
75	PN_004738	0	0.205351443	227.0773633	C4H6N2O2	3-Cyanoalanine
102	PN_004816	0	1.272605497	197.0456637	C9H10O5	4-Hydroxy-3-methoxymandelic acid
114	PN_004888	0	9.224297778	337.0523912	C9H15N4O8P	5-Aminoimidazole-4-carboxamide-1-beta-D-ribofuranosyl
146	PN_004967	5.385766359	7.339455851	179.0350362	C9H8O4	Acetylsalicylic acid
147	PN_005002	2.44E-14	0.349687382	462.0634639	C14H18N5O11P	Adenylosuccinic acid
149	PN_005038	179.841284	44.79496833	157.0367078	C4H6N4O3	Allantoin
703	PN_005101	48.48079514	13.20018099	145.0142395	C5H6O5	alpha-Ketoglutaric acid
154	PN_005143	12.81819571	6.101946653	187.0976369	C9H16O4	Azelaic acid
187	PN_010776	16.04198936	16.13520999	191.019793	C6H8O7	Citric acid
90	PN_010908	90.57894398	17.96303723	243.1965507	C14H28O3	3-hydroxytetradecanoic acid
270	PN_010966	25.66329306	15.41670002	274.1047847	C10H17N3O6	L-Glutaminyl-L-glutamic acid
200	PN_011076	2.83E-14	1.387800488	209.030178	C6H10O8	D-Saccharic acid
223	PN_011214	3.31E-14	9.856032812	153.0193172	C7H6O4	Gentisic acid
93	PN_011238	168.0958764	35.3887294	464.3018772	C26H43NO6	3alpha,7alpha,12alpha-Trihydroxy-5beta-cholan-24-oylglycine
231	PN_011250	190.5975025	50.69715076	448.3071316	C26H43NO5	Glycodeoxycholic acid
243	PN_011296	98.17002986	38.61225294	178.051019	C9H9NO3	Hippuric acid
56	PN_011361	0	0.127704092	357.1192353	C15H20O7	2-Acetyl-3-methylphenyl beta-D-glucopyranoside
377	PN_011702	27.95109984	9.811249331	188.0565211	C7H11NO5	N-Acetylglutamic acid
376	PN_011726	55.61138328	24.70200262	173.0931042	C7H14N2O3	N-Acetyl-L-ornithine
94	PN_011729	2.24E-14	0.140272543	421.296215	C24H40O3	3alpha-Hydroxy-5beta-cholanic acid
249	PN_011749	2.94E-14	0.189194943	447.0935833	C21H20O11	IUPAC | Kaempferol-3-O-galactoside | Luteolin 7-O-beta-D-glucoside | 5,7-dihydroxy-2-(4-hydroxyphenyl)-3-[(2S,3R,4S,5R,6R)-3,4,5-trihydroxy-6-(hydroxymethyl)oxan-2-yl]oxychromen-4-one
379	PN_011762	41.97065871	15.61309269	245.0932791	C13H14N2O3	N-Acetyltryptophane | DL-N-Acetyltryptophan | Indole-3-acetyl-alanine
381	PN_011798	21.11214955	11.06184614	176.038729	C6H11NO3S	N-Formyl-L-methionine
556	PN_012013	70.8500058	27.14675243	181.9918696	C7H5NO3S	Saccharin
678	PN_012109	1.51E-14	34.50371775	498.2898561	C26H45NO6S	Taurochenodeoxycholic acid
693	PN_012323	54.03614443	15.92092991	151.026162	C5H4N4O2	Xanthine
694	PN_012335	6.72491554	2.563119846	283.0686687	C10H12N4O6	Xanthosine
27	PN_012419	49.22856347	13.1214132	129.0557721	C6H10O3	(S)-3-Methyl-2-oxopentanoic acid
209	PN_012455	58.96384116	28.72248326	391.2856873	C24H40O4	Deoxycholic acid | Chenodeoxycholic acid
103	PN_012908	56.65932088	0.463454885	161.0245167	C9H6O3	4-Hydroxycoumarin
532	PN_012939	0	0.070343261	174.0560131	C9H7N	Quinoline
40	PN_013194	0	0.056138077	187.1340662	C10H20O3	10-Hydroxydecanoic acid
275	PN_013489	11.90223147	18.53645471	247.0933946	C9H16N2O6	L-Glutamyl-L-threonine
754	PN_013764	3.40928076	0.152435962	165.0557798	C8H8O	phenylacetaldehyde
112	PN_013829	0.249236221	0.13585859	477.1042733	C22H22O12	5,7-dihydroxy-2-[4-hydroxy-3-[(2S,3R,4S,5S,6R)-3,4,5-trihydroxy-6-(hydroxymethyl)oxan-2-yl]oxyphenyl]-3-methoxychromen-4-one
518	PN_014052	4.36E-14	0.228378568	549.167579	C18H32O16	Panose | D-Raffinose | Maltotriose | D-Melezitose
227	PN_014723	33.14246277	26.34821525	209.0666199	C7H14O7	Glucoheptose
24	PN_014982	0	4.947240943	329.2336274	C18H34O5	(7Z)-6,9,10-Trihydroxy-7-octadecenoic acid | (12Z)-9,10,11-Trihydroxy-12-octadecenoic acid
558	PN_015093	29.82239861	14.90076088	117.0193503	C4H6O4	Succinic acid
39	PN_015216	73.81841303	48.74327045	165.0418072	C6H6N4O2	1-Methylxanthine
30	PN_015490	47.88686088	25.6897918	333.2074477	C20H30O4	1,10a-Dihydroxy-4,4,7,11b-tetramethyl-2,3,4,4a,5,6,6a,7,10a,11,11a,11b-dodecahydrophenanthro[3,2-b]furan-9(1H)-one
32	PN_015542	37.44578372	14.93125394	271.0645067	C15H12O5	1,6-dihydroxy-3-methoxy-8-methylxanthen-9-one
69	PN_015731	0	0.194316709	297.040728	C16H10O6	3,8-dihydroxy-1-methylanthraquinone-2-carboxylic acid
59	PN_015822	44.96966422	1.329312881	333.2074247	C20H30O4	2-Hydroxy-4,5',8a'-trimethyl-1'-oxo-4-vinyloctahydro-1'H-spiro[cyclopentane-1,2'-naphthalene]-5'-carboxylic acid
16	PN_016010	2.58E-14	0.121163214	465.1379548	C22H26O11	(3R,4R,5R)-3,4-Dihydroxy-5-({6-O-[(2E)-3-phenyl-2-propenoyl]-beta-D-glucopyranosyl}oxy)-1-cyclohexene-1-carboxylic acid
104	PN_016106	4.39E-14	0.125438398	417.1192901	C21H22O9	4-Hydroxyphenyl 6-O-[(2E)-3-(4-hydroxyphenyl)-2-propenoyl]-beta-D-glucopyranoside
690	PN_016117	24.52928377	12.28438718	167.0210185	C5H4N4O3	Uric acid
369	PN_016156	3.92E-14	0.080310473	375.129872	C16H24O10	Mussaenosidic acid
701	PN_016314	58.53234424	23.03604592	206.0824109	C11H13NO3	afalanine
222	PN_016358	5.22E-14	0.102803781	269.0432948	C15H10O5	Galangin
682	PN_016367	146.958791	57.58860854	179.057514	C7H8N4O2	Theophylline | 1,7-Dimethylxanthine
384	PN_017256	88.344832	3.696954368	204.0667129	C11H11NO3	N-cinnamoylglycine
230	PN_017297	132.1000703	29.69165192	448.30716	C26H43NO5	Glycochenodeoxycholic acid
47	PN_017560	31.05462707	22.44317493	584.3573606	C28H49N3O7	13-Hydroxy-6-(1-hydroxyethyl)-9-isopropyl-12,14-dimethyl-3-methylene-15-nonyl-1-oxa-4,7,10-triazacyclopentadecane-2,5,8,11-tetrone
689	PN_017759	52.93924112	31.3350363	211.0977012	C10H14O2	UNII:12QWN45UL0
13	PN_018267	4.46E-14	0.121029202	225.0770061	C11H14O5	(2Z)-(3-Hydroxy-5-oxo-4-pentyl-2(5H)-furanylidene)acetic acid
134	PN_018482	3.26E-14	0.236085485	535.255353	C27H38O8	9-Acetoxy-4a,7b-dihydroxy-3-(hydroxymethyl)-1,1,6,8-tetramethyl-5-oxo-1,1a,1b,4,4a,5,7a,7b,8,9-decahydro-9aH-cyclopropa[3,4]benzo[1,2-e]azulen-9a-yl 2-methylbutanoate
704	PN_018532	17.6568554	9.388416221	115.0402079	C5H8O3	alpha-Ketoisovaleric acid
248	PN_018909	20.66309755	0.115839884	369.0829768	C16H18O10	IUPAC | Fraxin
2	PN_019054	11.80742396	9.486207335	329.2334679	C18H34O5	(15Z)-9,12,13-Trihydroxy-15-octadecenoic acid
131	PN_019328	1.56E-14	0.165638701	421.2598606	C24H38O6	7-{2,6-Dimethyl-8-[(2-methylbutanoyl)oxy]-1,2,6,7,8,8a-hexahydro-1-naphthalenyl}-3,5-dihydroxyheptanoic acid
121	PN_019337	58.24740177	21.61182656	403.1581888	C25H24O5	5-hydroxy-8,8-dimethyl-6-(2-methylbutanoyl)-4-phenylpyrano[2,3-h]chromen-2-one
523	PN_019544	45.03438175	1.394059706	333.2074352	C20H30O4	Prostaglandin B2 | (E)-2-[2-(1,2,4a,5-tetramethyl-2,3,4,7,8,8a-hexahydronaphthalen-1-yl)ethyl]but-2-enedioic acid
196	PN_019630	55.24327081	20.31860836	193.035477	C6H10O7	D-Galacturonic acid
195	PN_019631	40.14143187	17.28982258	195.0511327	C6H12O7	D-Galactonic acid
253	PN_020137	0	11.43982892	347.0400323	C10H13N4O8P	Inosine 5prime-monophosphate
188	PN_020503	46.39798236	20.02775997	407.2077621	C21H30O5	Cortisol | [6,10a-dihydroxy-4-(hydroxymethyl)-4,7,11b-trimethyl-9-oxo-1,2,3,4a,5,6,6a,7,11,11a-decahydronaphtho[2,1-f][1]benzofuran-5-yl] acetate
58	PN_020729	0	7.499301902	213.1134402	C11H18O4	2-Hexyl-3-methylenesuccinic acid
35	PN_021704	66.62875461	29.78182252	265.143934	C15H22O4	1,9b-dihydroxy-6,6,9a-trimethyl-1,5,5a,7,8,9-hexahydrobenzo[e][2]benzofuran-3-one
533	PN_021844	5.54E-14	1.112447013	283.0251008	C15H8O6	Rhein
244	PN_021945	13.70543678	10.28060143	171.0412249	C6H8N2O4	Hydantoin-5-propionic acid
81	PN_021963	124.1232993	70.33742795	171.0275663	C4H8O3	3-Hydroxybutyric acid
130	PN_022676	1.29E-14	0.164169985	369.0828862	C15H16O8	7-[(2S,3R,4S,5S,6R)-3,4,5-trihydroxy-6-(hydroxymethyl)oxan-2-yl]oxychromen-2-one
697	PN_023984	0	0.170536324	507.1508541	C24H28O12	[(1aS,1bS,2S,5aR,6S,6aS)-2-(beta-D-Glucopyranosyloxy)-6-hydroxy-1b,5a,6,6a-tetrahydrooxireno[4,5]cyclopenta[1,2-c]pyran-1a(2H)-yl]methyl (2E)-3-(4-hydroxyphenyl)acrylate
113	PN_024003	0	0.135167438	315.0723808	C13H16O9	5-(beta-D-Glucopyranosyloxy)-2-hydroxybenzoic acid | [(2R,3S,4R,5S)-3,4,5-trihydroxyoxan-2-yl]methyl 3,4,5-trihydroxybenzoate
21	PN_024008	2.30E-14	0.167143653	519.1917016	C26H32O11	(4S,5R,10S)-4,8-Dihydroxy-5-[(1S)-1-hydroxyheptyl]-10-[(R)-hydroxy(6-oxo-3,6-dihydro-2H-pyran-2-yl)methyl]-4,5,8,9,10,11-hexahydro-1H-furo[3prime,4prime:5,6]cyclonona[1,2-c]furan-1,3,6-trione
88	PN_024012	3.63E-14	0.106161621	361.1505306	C16H26O9	3-hydroxy-2-[3-methyl-2-[[3,4,5-trihydroxy-6-(hydroxymethyl)oxan-2-yl]oxymethyl]cyclopent-2-en-1-yl]propanoic acid
74	PN_024018	14.71334338	4.616264477	227.1291245	C12H20O4	3-(Methoxycarbonyl)-2-methylenenonanoic acid
11	PN_024056	1.35E-14	0.154549151	445.0780316	C21H18O11	(2S,3S,4S,5R,6S)-6-[4-(5,7-dihydroxy-4-oxochromen-3-yl)phenoxy]-3,4,5-trihydroxyoxane-2-carboxylic acid
315	PN_024084	0	18.26906452	203.1036471	C8H16N2O4	L-Valyl-L-serine
207	PN_024160	7.637378116	7.094035731	201.1133901	C10H18O4	Decanedioic acid
380	PN_024239	20.12657963	6.03547489	222.0773198	C11H13NO4	N-Acetyltyrosine
375	PN_024240	17.4103495	12.47949793	190.0544755	C7H13NO3S	N-Acetyl-L-methionine
14	PN_024710	3.464072341	2.560539128	395.2803907	C23H40O5	(2Z)-2-[(E)-6-(hydroxymethyl)-2,4,8,10-tetramethyldodec-2-enylidene]-4-methylpentanedioic acid
78	PN_025115	11.15071971	0.374970907	237.1499322	C14H22O3	3-Hydroxy-5,5,8a-trimethyl-3,4,4a,5,6,7,8,8a-octahydro-2-naphthalenecarboxylic acid
155	PN_025179	3.58E-14	0.098228581	127.0149132	C4H4N2O3	Barbituric acid
29	PN_025502	1.36E-14	21.2325792	356.0989959	C14H17NO7	(beta-D-Glucopyranosyloxy)(4-hydroxyphenyl)acetonitrile | 2-(4-hydroxyphenyl)-2-[(2R,3R,4S,5S,6R)-3,4,5-trihydroxy-6-(hydroxymethyl)oxan-2-yl]oxyacetonitrile | 2-[4-hydroxy-2-[(2S,3R,4S,5S,6R)-3,4,5-trihydroxy-6-(hydroxymethyl)oxan-2-yl]oxyphenyl]acetonitrile
63	PN_026350	40.9452151	16.91134346	236.0928676	C12H15NO4	2-acetamido-3-(4-methoxyphenyl)propanoic acid
698	PN_026368	15.49619361	11.75517012	439.1612277	C21H28O10	[(2R,3R,4S,5R,6R)-3,5-dihydroxy-2-(2-hydroxycyclohexyl)oxy-6-(hydroxymethyl)oxan-4-yl] (E)-3-(3,4-dihydroxyphenyl)prop-2-enoate | [(2R,3R,4S,5S,6R)-4,5-dihydroxy-2-(2-hydroxycyclohexyl)oxy-6-(hydroxymethyl)oxan-3-yl] (E)-3-(3,4-dihydroxyphenyl)prop-2-enoate
85	PN_026520	97.15827277	47.61214474	165.0418055	C6H6N4O2	3-Methylxanthine | 7-Methylxanthine
38	PN_026521	106.6079447	61.60107046	181.0368185	C6H6N4O3	1-Methyluric acid
214	PN_026535	3.01E-14	0.140900181	825.4288866	C41H64O14	Digoxin | 6-[[(3S,6aR,6bS,8aS,12aS,14bR)-4,4-bis(hydroxymethyl)-6a,6b,11,11,14b-pentamethyl-8a-[3,4,5-trihydroxy-6-(hydroxymethyl)oxan-2-yl]oxycarbonyl-1,2,3,4a,5,6,7,8,9,10,12,12a,14,14a-tetradecahydropicen-3-yl]oxy]-3,4,5-trihydroxyoxane-2-carboxylic acid
530	PN_026553	3.51919957	0.110118095	447.0934506	C21H20O11	Quercitrin | Luteolin-4prime-glucoside | 3,5-dihydroxy-2-(4-hydroxyphenyl)-7-[(3R,4S,5S,6R)-3,4,5-trihydroxy-6-(hydroxymethyl)oxan-2-yl]oxychromen-4-one
303	PN_026968	3.18E-14	0.619081347	267.0964242	C12H16N2O5	L-Seryl-L-tyrosine
0	PP_001034	34.15535262	10.318348	279.1700455	C18H24O	(+)-Bakuchiol
302	PP_002769	56.07741284	74.43867091	217.1180731	C9H16N2O4	L-Prolyl-L-threonine
284	PP_002934	4.68E-14	0.112131544	261.1443558	C11H20N2O5	L-Leucyl-L-glutamic acid | L-Isoleucyl-L-glutamic acid
286	PP_003337	18.74471158	14.36373302	245.1858645	C12H24N2O3	L-Leucyl-L-leucine
260	PP_003402	41.81839376	13.77707366	319.1364536	C15H18N4O4	L-Asparaginyl-L-Tryptophan
190	PP_003537	5.36E-14	11.701995	114.0661892	C4H7N3O	Creatinine
250	PP_003582	3.29E-14	24.00909004	127.0501352	C5H6N2O2	Imidazole-4-acetic acid
291	PP_003671	20.83924035	0.133795257	260.1967969	C12H25N3O3	L-Lysyl-L-leucine
115	PP_004041	52.52018989	44.80743409	132.0656435	C5H9NO3	5-Aminolevulinic acid | cis-4-Hydroxy-D-proline | trans-3-Hydroxy-L-proline | trans-4-Hydroxy-L-proline
101	PP_004250	161.3056593	49.03031537	146.0923767	C5H11N3O2	4-Guanidinobutyric acid
254	PP_004417	3.05E-14	0.108694441	566.2231773	C27H35NO12	Ipecoside
197	PP_004555	33.77901804	15.04186258	219.0472765	C6H12O7	D-Gluconic acid
267	PP_004874	45.05449171	15.88850915	162.1123941	C7H15NO3	L-Carnitine
145	PP_005310	32.50895288	15.28910636	146.1174404	C7H16NO2+	Acetylcholine | (3-Carboxypropyl)trimethylammonium
210	PP_005365	1.53E-14	0.234857324	228.0974984	C9H13N3O4	Deoxycytidine
296	PP_005379	29.92837039	15.25241781	133.097323	C5H12N2O2	L-Ornithine
108	PP_006398	43.99170957	2.66188458	267.1226023	C12H20O5	4-oxododecanedioic acid
33	PP_007880	2.34E-14	0.158022829	371.0792232	C19H14O8	1,6a,12a-trihydroxy-8-methoxy-3-methylnaphtho[3,2-c]isochromene-5,7,12-trione
148	PP_007887	41.09630787	16.1634451	177.0609351	C4H8N4O4	Allantoic acid
268	PP_007897	57.12341445	23.61839215	148.0603731	C5H9NO4	L-Glutamic acid
307	PP_007898	17.77191522	13.12525353	205.0970623	C11H12N2O2	L-Tryptophan
6	PP_007948	63.68037962	0.497377274	531.2197826	C28H34O10	(24S,25R)-12,25-Dihydroxy-18,19,20-trimethoxy-11,12,24,25-tetramethyl-4,6,9,14-tetraoxapentacyclo[13.7.3.0~3,7~.0~8,22~.0~16,21~]pentacosa-1(22),2,7,16,18,20-hexaen-13-one
717	PP_010603	5.32E-14	1.82395792	245.1284642	C14H16N2O2	cyclo(phenylalanyl-prolyl)
388	PP_010605	2.80E-14	0.174838658	181.0605533	C8H8N2O3	Nicotinuric acid
359	PP_010679	1.65E-14	0.147936675	249.1961049	C15H24N2O	Matrine
271	PP_011493	3.62E-14	0.159136162	244.128748	C10H17N3O4	L-Glutaminyl-L-proline
378	PP_012342	41.7957537	22.56467465	131.1180558	C6H14N2O	N-Acetylputrescine
298	PP_012394	2.166956503	5.070450306	279.1695842	C15H22N2O3	L-Phenylalanyl-L-leucine | L-Isoleucyl-L-phenylalanine
9	PP_012426	38.73010399	47.86030633	520.3397336	C26H50NO7P	(2S)-3-Hydroxy-2-[(9Z,12Z)-9,12-octadecadienoyloxy]propyl 2-(trimethylammonio)ethyl phosphate | [2-hydroxy-3-[(9Z,12Z)-octadeca-9,12-dienoyl]oxypropyl] 2-(trimethylazaniumyl)ethyl phosphate
314	PP_012489	7.286103509	5.381764605	265.1543485	C14H20N2O3	L-Valyl-L-phenylalanine
43	PP_012612	8.731649694	4.133085043	177.1132721	C8H16O4	12-Crown-4
28	PP_012626	64.97915843	11.29204562	144.0655127	C6H9NO3	(S)-6-Oxo-2-piperidinecarboxylic acid
366	PP_012858	4.09E-14	0.208801794	439.1723321	C25H26O7	Methyl 2-[4-hydroxy-3-(3-methyl-2-buten-1-yl)benzyl]-3-(4-hydroxyphenyl)-4-methoxy-5-oxo-2,5-dihydro-2-furancarboxylate
123	PP_012866	57.44523228	29.88263609	181.0857444	C10H12O3	6-Ethyl-2,4-dihydroxy-3-methylbenzaldehyde
186	PP_013255	2.11E-14	14.47314735	104.1069267	C5H14NO+	Choline
282	PP_013324	27.55464228	12.10419067	132.1020823	C6H13NO2	L-Leucine | L-Isoleucine
34	PP_013336	49.88570791	23.96557548	197.0668743	C7H8N4O3	1,7-Dimethyluric acid
277	PP_016569	2.99E-14	10.10000007	120.065528	C4H9NO3	L-Homoserine | beta-Homoserine | gamma-Amino-beta-hydroxybutyric acid
559	PP_016713	90.31550869	45.65610973	174.1124225	C8H15NO3	Swainsonine
285	PP_016714	3.54E-14	6.18118738	245.1856552	C12H24N2O3	L-Leucyl-L-isoleucine | L-Isoleucyl-L-isoleucine
191	PP_016914	74.08770858	30.7206277	130.0864737	C6H11NO2	Cycloleucine | (S)-Piperidine-2-carboxylic acid
279	PP_017266	26.71844537	0.665738049	219.1337748	C9H18N2O4	L-Isoleucyl-L-serine
117	PP_017418	3.83E-14	0.07042645	163.1077735	C6H14N2O3	5-Hydroxy-D,L-lysine
109	PP_017433	0	10.01779084	129.065909	C5H8N2O2	5,6-Dihydrothymine | 2,3-Dihydroxypyridine
312	PP_017915	27.35022586	14.18521916	231.1701865	C11H22N2O3	L-Valyl-L-leucine
299	PP_018293	26.01097122	15.75515335	352.165431	C20H21N3O3	L-Phenylalanyl-L-tryptophan | L-Tryptophyl-L-phenylalanine
211	PP_018736	125.7117009	9.116816698	268.1039526	C10H13N5O4	Deoxyguanosine
705	PP_018742	5.59E-14	1.967489319	176.0916603	C7H13NO4	alpha-aminopimelic acid
201	PP_018745	0	6.545831209	300.2894342	C18H37NO2	D-Sphingosine
310	PP_018757	2.36E-14	8.16882929	118.0861831	C5H11NO2	L-Valine | Norvaline
225	PP_020130	24.40989648	10.8404384	172.1693875	C10H18O	Geraniol | Fenchyl alcohol
136	PP_020805	2.40E-14	0.134503168	269.0806591	C16H14O5	9-{[(2Z)-4-Hydroxy-3-methyl-2-buten-1-yl]oxy}-7H-furo[3,2-g]chromen-7-one
70	PP_020979	82.35617796	39.61359526	247.1440048	C14H18N2O2	3-(1H-Indol-3-yl)-2-(trimethylammonio)propanoate
316	PP_021504	2.10E-14	0.162064771	246.1446049	C10H19N3O4	L-asparaginyl-L-leucine | L-Asparaginyl-L-Isoleucine
36	PP_021614	0	6.669979131	291.1952447	C18H28O4	1-(4-Hydroxy-3-methoxyphenyl)-5-methoxy-3-decanone
287	PP_021767	39.61690125	12.19843633	279.1698341	C15H22N2O3	L-Leucyl-L-phenylalanine
95	PP_021875	0	0.160683841	271.0599313	C15H10O5	3prime,4prime,7-Trihydroxyisoflavone
276	PP_022025	19.44592356	5.6104308	156.0767723	C6H9N3O2	L-Histidine
3	PP_022173	50.20403616	3.032388809	471.3466413	C30H46O4	(1R,3aS,5aR,5bR,11aR,13aR)-7-hydroxy-5a,5b,8,8,11a-pentamethyl-9-oxo-1-prop-1-en-2-yl-2,3,4,5,6,7,7a,10,11,11b,12,13,13a,13b-tetradecahydro-1H-cyclopenta[a]chrysene-3a-carboxylic acid
274	PP_022375	3.79E-14	0.092283603	245.1130323	C10H16N2O5	L-Glutamyl-L-proline
91	PP_022425	5.10E-14	0.238140253	311.1261494	C19H18O4	3-methoxy-1-(4-methoxy-1-benzofuran-5-yl)-3-phenylpropan-1-one
52	PP_022588	30.27113911	1.552013674	209.080839	C11H12O4	2,5-Dimethoxycinnamic acid
305	PP_022643	6.46E-14	0.097436758	233.1492181	C10H20N2O4	L-Threonyl-L-leucine | L-Threonyl-L-isoleucine
280	PP_022722	51.55950371	14.58838285	231.1701329	C11H22N2O3	L-Isoleucyl-L-valine
127	PP_022923	4.47E-14	0.097825717	241.0854064	C15H12O3	7-Hydroxyflavanone
367	PP_023117	76.07629268	32.10946675	217.0682016	C7H14O6	Methyl-beta-D-galactoside | Methyl-alpha-D-galactoside
393	PP_023264	24.06865306	42.19396631	400.3417626	C23H46NO4+	O-Palmitoyl-L-carnitine
7	PP_023414	25.75555212	15.61550956	306.2788939	C20H35NO	(2E,4E,10Z)-N-Isobutyl-2,4,10-hexadecatrienamide
122	PP_023716	3.98E-14	12.64925771	132.1021261	C6H13NO2	6-Aminohexanoic acid
18	PP_024174	6.10E-14	0.134138626	247.132592	C15H18O3	(3Z,6Z)-2,2,6-trimethyl-12-oxabicyclo[8.2.1]trideca-3,6,10(13)-triene-5,11-dione
156	PP_024203	12.09845752	6.710780846	183.080315	C13H10O	Benzophenone
386	PP_024214	120.6580374	42.75440153	154.0973711	C7H11N3O	N-omega-Acetylhistamine
236	PP_024220	5.13E-14	2.106479929	152.0567204	C5H5N5O	Guanine
266	PP_024232	5.89E-14	1.458775849	191.06624	C6H10N2O5	L-Aspartylglycine | Glycyl-L-aspartic acid
306	PP_024237	24.55202802	9.199898784	267.1313549	C13H18N2O4	L-Threonyl-L-phenylalanine
202	PP_024659	17.31855991	13.07307976	203.0524796	C6H12O6	D-Tagatose | myo-Inositol | allo-Inositol | alpha-D-Talose | D-chiro-Inositol | cyclohexane-1,2,3,4,5,6-hexol
257	PP_024780	5.04E-14	0.118992362	189.1231768	C8H16N2O3	L-Alanyl-L-valine
288	PP_025186	21.90893152	10.38126811	231.1701017	C11H22N2O3	L-Leucyl-L-valine | L-Valyl-L-isoleucine
79	PP_025187	32.18899161	9.957443742	464.2179423	C26H29N3O5	3-Hydroxy-9,9,16,16-tetramethyl-8-oxa-14,23,25-triazaheptacyclo[17.5.2.0~1,17~.0~3,15~.0~4,13~.0~7,12~.0~19,23~]hexacosa-4,6,10,12,14-pentaene-24,26-dione 14-oxide
251	PP_025834	35.22109236	21.2055173	176.0705897	C10H9NO2	Indole-3-acetic acid
8	PP_026626	30.9703451	0.557108463	363.1434634	C17H24O7	(2R,3S,4S,5R,6S)-2-(hydroxymethyl)-6-[4-hydroxy-2-(3-methylbut-2-enyl)phenoxy]oxane-3,4,5-triol
119	PP_026652	105.6547297	11.71998117	241.1433045	C13H20O4	5-[(1E,3E)-1,3-Heptadien-1-yl]-2,3-dihydroxycyclopentanecarboxylic acid
272	PP_026677	33.29103066	14.88229192	304.1615626	C11H21N5O5	L-Glutamyl-L-Arginine | L-Arginyl-L-glutamic acid
524	PP_026841	3.10E-14	2.906609679	179.117808	C10H14N2O	Pseudooxynicotine
86	PP_027025	35.2024339	0.661469712	155.0702052	C8H12O4	3-[(1E)-1-Propen-1-yl]pentanedioic acid
297	PP_027759	16.65677841	0.243743858	237.1231377	C12H16N2O3	L-Phenylalanyl-L-alanine
110	PP_028153	5.61E-14	0.087791841	447.0910425	C21H18O11	5,6-Dihydroxy-4-oxo-2-phenyl-4H-chromen-7-yl beta-D-glucopyranosiduronic acid
128	PP_028154	33.42109856	27.23509035	183.0511683	C6H6N4O3	7-Methyluric acid
83	PP_028157	28.55031898	9.155436541	295.1690306	C20H22O2	3-Methoxy-4-(3-methyl-2-buten-1-yl)-5-[(E)-2-phenylvinyl]phenol
300	PP_028919	0	20.96028536	116.0705193	C5H9NO2	L-Proline
680	PP_029118	159.7888234	79.96928421	181.0719323	C7H8N4O2	Theobromine
265	PP_029231	31.16536265	15.3850567	233.1130589	C9H16N2O5	L-Aspartyl-L-valine
99	PP_029362	10.56070361	0.857956258	206.0448425	C10H7NO4	4,8-Dihydroxyquinoline-2-carboxylic acid
15	PP_029482	0	0.139235515	301.215886	C20H30O3	(2Z)-3-Methyl-5-(1,2,5,5-tetramethyl-7-oxo-1,2,3,4,4a,5,6,7-octahydro-1-naphthalenyl)-2-pentenoic acid
313	PP_029650	77.53032237	10.07967098	246.1811022	C11H23N3O3	L-Valyl-L-lysine
383	PP_029773	3.81E-14	1.28801327	126.1025268	C6H11N3	N-Methylhistamine | 3-Methylhistamine
45	PP_029869	16.38168941	6.260218848	329.1382063	C19H22O6	13,17-Dihydroxy-4-methyl-14-methylene-5-oxo-6-oxapentacyclo[11.2.1.1~4,7~.0~1,10~.0~3,9~]heptadec-8-ene-2-carboxylic acid
535	PP_029951	34.58376351	0.18462546	194.0479871	C6H11NO4S	S-(2-Carboxyethyl)cysteine
106	PP_030946	17.67997558	7.99832389	409.1831402	C19H30O8	4-[4-hydroxy-2,2,6-trimethyl-6-[(2S,3R,4S,5S,6R)-3,4,5-trihydroxy-6-(hydroxymethyl)oxan-2-yl]oxycyclohexylidene]but-3-en-2-one
221	PP_032387	1.36E-14	26.67826313	230.0955762	C9H16N3O2S	Ergothioneine
84	PP_032443	5.94E-14	4.473859547	106.0862465	C4H11NO2	3-Methylamino-1,2-propanediol
157	PP_032447	4.69E-14	8.055573482	118.0862137	C5H11NO2	Betaine
390	PP_032449	23.51732045	9.015203752	132.1020646	C6H13NO2	Norleucine
728	PP_032452	2.69E-14	20.75080051	100.0756648	C5H9NO	gamma-Valerolactam
290	PP_032456	19.38944066	11.09575979	147.1127392	C6H14N2O2	L-Lysine
692	PP_032463	8.046710804	5.854220572	153.0544987	C8H8O3	Vanillin
259	PP_032480	12.32174767	0.566591712	322.1872066	C15H23N5O3	L-Arginyl-L-phenylalanine
525	PP_032486	80.41455032	31.56152953	337.104278	C20H16O5	Psoralidin
19	PP_033448	38.75570302	30.98013063	621.2714334	C33H42O10	(3aS,3bS,4R,4aR,6S,7S,7aR,8R,8aR,9aS)-4,8,9a-Triacetoxy-4a-hydroxy-2,2,3b,6,8a-pentamethyl-1-oxotetradecahydro-1H-cyclopenta[a]-s-indacen-7-yl benzoate
744	PP_033514	17.95673535	5.032671234	583.2545668	C30H40O10	methyl (4aR,4bR,5R,6R,10aR,12aS)-5,6-diacetyloxy-2,4b,7,7,10a,12a-hexamethyl-12-methylidene-1,4,8-trioxo-4a,5,6,6a,9,10,10b,11-octahydronaphtho[1,2-h]isochromene-2-carboxylate
387	PP_033807	65.33839162	14.06063387	240.2318472	C15H26O	Nerolidol
256	PP_034752	5.38E-14	0.234966337	203.1388541	C9H18N2O3	L-Alanyl-L-leucine
242	PP_034979	42.24379867	7.286336729	155.0814371	C7H10N2O2	Hexahydropyrrolo[1,2-a]pyrazine-1,4-dione
308	PP_035847	27.30870433	10.97627421	318.1811307	C17H23N3O3	L-Tryptophyl-L-leucine
295	PP_035926	94.45408972	40.87091241	288.216747	C15H29NO4	L-Octanoylcarnitine
193	PP_036047	1.26E-14	0.57490967	244.0927663	C9H13N3O5	Cytidine
278	PP_036398	22.1510363	13.7333833	245.1858503	C12H24N2O3	L-Isoleucyl-L-leucine
264	PP_036628	15.24169847	2.79948378	297.1078949	C13H16N2O6	L-Aspartyl-L-tyrosine
247	PP_036726	15.7724194	16.50522381	298.0966716	C11H15N5O3S	IUPAC | 5prime-Deoxy-5prime-(methylthio)adenosine
273	PP_036934	2.14E-14	0.065909571	261.1452279	C11H20N2O5	L-Glutamyl-L-leucine
294	PP_036940	0.059319395	0.129000604	164.0739588	C6H14NO2S+	L-Methionine methylsulfonium
212	PP_037163	4.25E-14	0.111269436	164.0920496	C6H13NO4	Deoxymannojirimycin
20	PP_037340	0	0.150582338	487.3410269	C30H46O5	(3beta,5xi,9xi)-3,23-Dihydroxy-1-oxoolean-12-en-28-oic acid
51	PP_037873	1.62E-14	0.086239895	112.0392735	C5H5NO2	2,5-Dihydroxypyridine
293	PP_037889	31.5390018	13.98214585	150.0582899	C5H11NO2S	L-Methionine
391	PP_037890	37.85082435	16.45157034	204.1229548	C9H17NO4	O-Acetyl-L-carnitine
263	PP_037908	28.85772491	16.25912583	281.1130176	C13H16N2O5	L-Aspartyl-L-phenylalanine
301	PP_037911	9.38970434	3.142887684	187.1075622	C8H14N2O3	L-Prolyl-L-alanine
116	PP_040158	29.8320266	14.34396945	250.177715	C15H23NO2	5-Butyl-4-hydroxy-3-methyl-6-(3-methyl-2-buten-1-yl)-2(1H)-pyridinone
204	PP_040240	3.75E-14	16.80805629	145.0471065	C4H10O4	D-Threitol
120	PP_040329	3.87E-14	0.114138603	315.195329	C20H28O4	5-[2-(furan-3-yl)ethyl]-8-hydroxy-5,6,8a-trimethyl-3,4,4a,6,7,8-hexahydronaphthalene-1-carboxylic acid | (2aS,5aR,7R,8aR)-6-[2-(3-Furyl)ethyl]-6-hydroxy-2a,5a,7-trimethyldecahydro-2H-naphtho[1,8-bc]furan-2-one
261	PP_040612	3.78E-14	0.831091437	248.0860919	C8H13N3O6	L-Asparaginyl-L-aspartic acid
283	PP_040875	0.042930193	0.142475651	203.1389204	C9H18N2O3	L-Leucyl-L-alanine | L-Isoleucyl-L-alanine
72	PP_040992	19.12474281	14.84882088	197.080808	C10H12O4	3-(2-Hydroxy-4-methoxyphenyl)propanoic acid
289	PP_041278	0	0.371036089	189.1232666	C8H16N2O3	L-Leucylglycine
371	PP_041358	1.92E-14	6.991762747	328.3202656	C20H41NO2	N,N-Dimethylsphing-4-enine
189	PP_041478	45.00796707	15.72142478	132.0768975	C4H9N3O2	Creatine
252	PP_041523	32.21672766	23.60846144	206.0811569	C11H11NO3	Indole-3-lactic acid
304	PP_041663	6.12E-14	2.798691697	159.0257348	C4H8O5	L-Threonic acid
323	PP_041769	23.28879709	13.05511047	153.1272992	C10H16O	Limonene-1,2-epoxide
385	PP_042372	103.8908877	14.17591544	189.1597189	C9H21N2O2+	N-epsilon,N-epsilon,N-epsilon-Trimethyllysine
311	PP_042479	0	6.72285962	247.1285241	C10H18N2O5	L-Valyl-L-glutamic acid
26	PP_042616	2.08E-14	1.093221475	152.0705865	C8H9NO2	(R)-(-)-2-Phenylglycine
129	PP_042780	3.22E-14	8.245987437	547.1814981	C27H30O12	7-[(2S,3R,4R,5R,6S)-3,4,5-trihydroxy-6-methyloxan-2-yl]oxy-3-[4-[(2S,3R,4R,5R,6S)-3,4,5-trihydroxy-6-methyloxan-2-yl]oxyphenyl]chromen-4-one
17	PP_043259	1.296302351	1.277658855	576.3223571	C32H41N5O5	(3S,10S,13Z)-10-Benzyl-6-(N,N-dimethyl-L-alanyl-L-valyl)-8,11-dioxo-2-oxa-6,9,12-triazatricyclo[13.2.2.0^(3,7)]nonadeca-1(17),13,15,18-tetraene
48	PP_043305	28.46719547	15.07291901	157.0759146	C10H8N2	2,2prime-Bipyridine
235	PP_043317	2.49E-14	11.16428914	118.0611077	C3H7N3O2	Guanidineacetic acid
685	PP_043325	3.26E-14	0.150605032	127.0501231	C5H6N2O2	Thymine
309	PP_043326	23.79051413	11.50990416	182.0811758	C9H11NO3	L-Tyrosine | 3-Amino-3-(4-hydroxyphenyl)propanoate
67	PP_043331	43.91922376	14.21149515	306.0494492	C9H12N3O7P	2prime,3prime-Cyclic Cytidine monophosphate
534	PP_043334	1.67E-14	0.466158858	377.1450903	C17H20N4O6	Riboflavin
96	PP_043815	0.322694517	0.847987591	330.0595364	C10H12N5O6P	3prime,5prime-Cyclic Adenosine monophosphate
262	PP_044320	31.57122006	7.041480832	265.0851138	C9H16N2O5S	L-Aspartyl-L-methionine
519	PP_044974	54.96017021	18.47439368	220.1178992	C9H17NO5	Pantothenic acid
37	PP_046041	56.83844305	25.04475465	137.0709452	C7H9N2O+	1-Methylnicotinamide
281	PP_046084	20.70431214	14.55311568	209.0919852	C10H12N2O3	L-Kynurenine
