# Supplementary material for: A Comprehensive Mass Spectrometry-Based Workflow for Clinical Metabolomics Cohort Studies
Source: Metabolites. 2022 Nov 24;12(12):1168. doi: 10.3390/metabo12121168 (PMC9782571; doi:10.3390/metabo12121168)
Supplement: Supplementary file 1 [file metabolites-12-01168-s001.zip › source data-2.csv]

	Example Description
	PP_0011289 LC-MS polar platform, ESI (+), peak number
	PN_0011296 LC-MS polar platform, ESI (-), peak number
	LP_0006570 LC-MS lipid platform, ESI (+), peak number
	LN_0002049 LC-MS lipid platform, ESI (-), peak number
	GC_1085 GC-MS platform, peak number
	RSD: realtive standard deviation
	Metabolite	RSD_raw	RSD_norm	mz_mean	Compound_Formula	Compound_Name
0	PP_0011289	39.45147226	13.27281396	352.165257	C20H21N3O3	L-Tryptophyl-L-phenylalanine
1	PN_0011296	177.0096918	37.26759633	178.0504231	C9H9NO3	Hippuric acid
2	PN_0002801	135.2699939	0.415391476	213.1494271	C12H22O3	(2E)-11-Hydroxy-2-dodecenoic acid
3	PP_0018771	60.61392014	1.679443326	260.1960646	C12H25N3O3	L-Isoleucyl-L-lysine
4	PP_0018757	45.71869673	10.62199647	118.0862638	C5H11NO2	L-Valine | Norvaline
5	PP_0002769	234.916286	72.03314367	217.1180834	C9H16N2O4	L-Prolyl-L-threonine
6	PN_0021704	51.94533342	53.98605328	265.1438915	C15H22O4	1,9b-Dihydroxy-6,6,9a-trimethyl-1,5,5a,7,8,9-hexahydrobenzo[e][2]benzofuran-3-one
7	PN_0014292	32.46159272	0.082000307	269.1755773	C15H26O4	2-(9-Decen-1-yl)pentanedioic acid
8	PP_0042372	80.07137677	22.89831119	189.1595878	C9H21N2O2+	N-epsilon,N-epsilon,N-epsilon-Trimethyllysine
9	PN_0016238	63.05299832	0.16604319	445.223159	C25H34O7	7-Formyl-4,7'-dihydroxy-6-(hydroxymethyl)-2',5',5',8a'-tetramethyl-3',4',4a',5',6',7',8',8a'-octahydro-2'H,3H-spiro[1-benzofuran-2,1'-naphthalen]-6'-yl acetate | 4,5,7prime-Trihydroxy-2prime,5prime,5prime,8aprime-tetramethyl-3prime,4prime,4aprime,5,5prime,6prime,7,7prime,8prime,8aprime-decahydro-2primeH,3H-spiro[furo[2,3-f][2]benzofuran-2,1prime-naphthalen]-6prime-yl acetate
10	PN_0011041	42.85594278	0.10340622	365.2331851	C21H34O5	2-{8-Hydroxy-4a,8-dimethyl-4-[(3-methylpentanoyl)oxy]decahydro-2-naphthalenyl}acrylic acid
11	PP_0030946	224.6426191	13.33256366	409.1830204	C19H30O8	4-[4-Hydroxy-2,2,6-trimethyl-6-[(2S,3R,4S,5S,6R)-3,4,5-trihydroxy-6-(hydroxymethyl)oxan-2-yl]oxycyclohexylidene]but-3-en-2-one
12	PP_0004334	48.36528906	1.302068314	231.1374489	C15H20O3	Telekin
13	PP_0022838	83.35633039	0.23943667	170.0800095	C8H11NO3	Pyridoxine
14	PN_0026375	91.79793273	0.410202151	417.1187439	C21H22O9	1-O-{2,4-Dihydroxy-6-[(E)-2-phenylvinyl]benzoyl}hexopyranose
15	PP_0002228	88.46637232	0.42618922	277.1793051	C17H24O3	(1R,4aR)-1,4a-Dimethyl-7-oxo-3,4,4b,5,6,9,10,10a-octahydro-2H-phenanthrene-1-carboxylic acid
16	PN_0004858	498.8810878	45.28079256	182.0454262	C8H9NO4	4-Pyridoxic acid
17	PP_0004421	92.85742078	19.37482489	261.0364543	C6H13O9P	myo-Inositol 2-phosphate
18	PP_0034438	125.560736	1.715147864	181.0856311	C10H14O4	(5E,8Z)-4,7-Dihydroxy-2-methyl-2,3,4,7-tetrahydrooxecin-10-one
19	PP_0040781	114.9084415	48.65187447	223.0961545	C12H14O4	(E)-Ethyl ferulate
20	PN_0012714	126.9553891	1.565641735	1123.590836	C53H90O22	(3beta,5xi,9xi,12beta,13xi)-20-{[6-O-(alpha-L-Arabinopyranosyl)-beta-D-glucopyranosyl]oxy}-12-hydroxydammar-24-en-3-yl 2-O-beta-D-glucopyranosyl-beta-D-glucopyranoside
21	PN_0010966	43.10870279	7.438093868	274.1043801	C10H17N3O6	L-Glutamyl-L-glutamine | L-Glutaminyl-L-glutamic acid
22	PP_0025590	107.0866682	0.778352583	262.1184275	C13H15N3O3	L-Tryptophylglycine
23	PP_0017915	59.06973878	17.89563142	231.1701251	C11H22N2O3	L-Valyl-L-leucine
24	PP_0026906	48.4252125	0.239258365	243.0874643	C12H10N4O2	7,8-Dimethylalloxazine
25	PP_0027709	77.22712156	0.250999671	271.0625861	C15H10O5	Baicalein
26	PP_0017739	160.3415607	1.960615674	122.0964383	C8H11N	3,4-Dimethylaniline
27	PP_0043321	62.85242422	11.02890859	199.071274	C8H10N2O4	Mimosine
28	PP_0032497	79.81781849	7.981089148	583.2538806	C33H34N4O6	IUPAC
29	PN_0011546	68.11716864	6.245162081	145.0611396	C5H10N2O3	L-Glutamine
30	PP_0023083	136.8289646	5.899114523	138.0546475	C7H7NO2	4-Aminobenzoic acid
31	PP_0022645	227.4930489	4.66758944	211.1439122	C11H18N2O2	3-Isobutylhexahydropyrrolo[1,2-a]pyrazine-1,4-dione
32	PN_0010593	84.43818335	0.24262028	411.1188808	C20H25ClO7	13-Chloro-14-hydroxy-9,16-dimethoxy-3-methyl-4,5,7,8,9,10-hexahydro-1H-2-benzoxacyclotetradecine-1,6,11(3H,12H)-trione
33	PP_0036048	84.71223438	119.6407941	170.0922183	C7H11N3O2	3-Methylhistidine
34	PN_0000557	99.10874528	0.529605986	391.1398947	C19H22O6	[(3aR,4S,6aR,9R,9aR,9bR)-9-Methyl-3,6-dimethylidene-2,8-dioxo-3a,4,5,6a,7,9,9a,9b-octahydroazuleno[4,5-b]furan-4-yl] 2-(hydroxymethyl)prop-2-enoate
35	PP_0005346	99.3120615	0.702641639	285.0771766	C16H12O5	Wogonin | Acacetin | Maackiain
36	PN_0015358	96.97171137	0.244352237	329.2334786	C18H34O5	(7Z)-6,9,10-Trihydroxy-7-octadecenoic acid | (12Z)-9,10,11-Trihydroxy-12-octadecenoic acid
37	PP_0028924	141.2553985	6.334911476	211.1439449	C11H18N2O2	cyclo(D)-Pro-(D)-Ile
38	PP_0033807	115.8113095	8.91611203	240.231716	C15H26O	Nerolidol
39	PN_0004462	48.15627564	4.142664301	289.0714124	C15H14O6	(+)-Catechin
40	PN_0012085	76.66844513	13.00839546	173.0813935	C8H14O4	Suberic acid | Suberic acid
41	PP_0010811	57.25114818	0.368272101	253.1178454	C12H16N2O4	L-Seryl-L-phenylalanine
42	PP_0026698	49.82925704	0.187971176	151.1114749	C10H14O	(-)-Myrtenal
43	PN_0001864	175.7110347	2.015027665	375.1298297	C15H22O8	(2S,3R,4S,5S,6R)-2-[[(1S,4aR,7aS)-7-(Hydroxymethyl)-1,4a,5,7a-tetrahydrocyclopenta[c]pyran-1-yl]oxy]-6-(hydroxymethyl)oxane-3,4,5-triol
44	PP_0029454	57.35157812	4.215403197	235.168986	C15H22O2	(1R,3R,7S,8S,9R)-9-Isopropyl-1-methyl-2-methylene-5-oxatricyclo[5.4.0.03,8]undecan-4-one
45	PP_0016386	58.57518726	169.5032307	246.1446256	C10H19N3O4	L-Valyl-L-glutamine
46	PN_0005101	94.29023049	14.86237051	145.0135761	C5H6O5	alpha-Ketoglutaric acid
47	PN_0027445	80.55950896	13.55079736	311.22281	C18H32O4	(9Z,12E)-15,16-dihydroxyoctadeca-9,12-dienoic acid
48	PN_0024003	65.99806544	0.27511292	315.0723222	C13H16O9	Gentisic acid 5-beta-glucoside | Ginnalin B
49	PN_0000646	37.67778709	0.219103523	351.2174276	C20H32O5	2-[(2R,5S,8aR)-5-(Carboxymethyl)-2-ethenyl-2,5,8a-trimethyl-3,4,4a,6,7,8-hexahydrochromen-6-yl]-2-methylpropanoic acid
50	PP_0037890	58.83598126	19.98930366	204.1228481	C9H17NO4	O-Acetyl-L-carnitine
51	PP_0043307	66.48127576	7.496714161	159.0415992	C5H6N2O4	4,5-Dihydroorotic acid
52	PP_0042084	78.68544915	10.27636373	157.0607042	C6H8N2O3	L-beta-Imidazolelactic acid
53	PN_0021844	325.6371086	8.537719863	283.0246423	C15H8O6	Rhein
54	PN_0013713	42.06499752	15.91911888	269.0877775	C10H14N4O5	L-Histidyl-L-aspartic acid
55	PN_0018317	86.30547772	0.261503593	519.1143078	C23H22O11	6prime-Methoxypseudobaptigenin 7-O-glucoside
56	PN_0005143	76.43040183	7.263284556	187.0970804	C9H16O4	Azelaic acid
57	PN_0019616	42.00442286	28.81218493	251.0771791	C5H6N2O2	Imidazole-4-acetic acid
58	PP_0010679	84.3263799	45.02523806	249.195907	C15H24N2O	Matrine
59	PP_0037889	49.06321143	10.3866385	150.0582273	C5H11NO2S	L-Methionine
60	PN_0015239	80.55591714	0.146430184	501.3220996	C30H46O6	16-Hydroxygypsogenic acid | IlexgeninA
61	PN_0015206	55.91670917	0.147193848	779.423002	C41H64O14	(2S,3S,4R,5R,6R)-6-[[(3S,6aR,6bS,8aR,14bR)-8a-Carboxy-12-hydroxy-4,4,6a,6b,11,11,14b-heptamethyl-1,2,3,4a,5,6,7,8,9,10,12,12a,14,14a-tetradecahydropicen-3-yl]oxy]-4,5-dihydroxy-3-[(2S,3R,4S,5R)-3,4,5-trihydroxyoxan-2-yl]oxyoxane-2-carboxylic acid
62	PP_0016146	65.93649168	0.73926277	244.1290764	C10H17N3O4	L-Prolyl-L-glutamine
63	PP_0027071	68.87962552	0.401665445	237.0872719	C8H16N2O4S	L-Seryl-L-methionine
64	PN_0010908	50.43494408	32.68322898	243.1963378	C14H28O3	3-Hydroxytetradecanoic acid
65	PP_0018736	91.73928586	1.036010646	268.1039322	C10H13N5O4	2prime-Deoxyguanosine
66	PP_0023715	51.36187042	0.50198208	206.0810739	C11H11NO3	5-Methoxyindole-3-acetic acid
67	PN_0027327	93.24663151	0.295421888	463.0886433	C21H20O12	Myricitrin | Quercetin 3-O-glucoside | Hyperoside
68	PP_0022173	141.7597941	3.107185227	471.3458873	C30H46O4	(1R,3aS,5aR,5bR,11aR,13aR)-7-Hydroxy-5a,5b,8,8,11a-pentamethyl-9-oxo-1-prop-1-en-2-yl-2,3,4,5,6,7,7a,10,11,11b,12,13,13a,13b-tetradecahydro-1H-cyclopenta[a]chrysene-3a-carboxylic acid
69	PN_0001986	32.54013699	0.105105294	193.0503795	C10H10O4	(-)-6-Hydroxymellein
70	PP_0017433	79.13846284	6.464071101	129.0658352	C5H8N2O2	5,6-Dihydrothymine
71	PP_0004041	112.2287271	27.62229718	132.0654998	C5H9NO3	5-Aminolevulinic acid | trans-3-Hydroxy-L-proline
72	PP_0028867	95.21456896	0.316915109	170.0214251	C3H8NO5P	2-Amino-3-phosphonopropanoic acid
73	PN_0016460	80.70862007	63.11210873	331.1891157	C20H28O4	5-[2-(3-Furyl)ethyl]-8a-(hydroxymethyl)-5,6-dimethyl-3,4,4a,5,6,7,8,8a-octahydro-1-naphthalenecarboxylic acid | (E)-5-[(1S,2R,4aR,8aR)-1,2,4a,5-Tetramethyl-7-oxo-3,4,8,8a-tetrahydro-2H-naphthalen-1-yl]-3-formylpent-2-enoic acid
74	PP_0017467	81.49168826	9.48963308	120.0656477	C4H9NO3	L-Threonine | L-Homoserine | Allothreonine | gamma-Amino-beta-hydroxybutyric acid | (S)-(+)-2-Amino-2-methyl-3-hydroxypropanoic acid
75	PP_0011667	78.74711387	2.299311132	303.231235	C20H32O3	(2E)-5-[(1R,3R,8aS)-3-Hydroxy-5,5,8a-trimethyl-2-methylenedecahydro-1-naphthalenyl]-3-methyl-2-pentenoic acid
76	PP_0032452	114.0532716	21.07543743	100.0759374	C5H9NO	gamma-Valerolactam
77	PN_0013646	50.84929739	9.904888717	251.1642337	C15H24O3	6-(7-Methyloctyl)-4,6-dihydro-1H,3H-furo[3,4-c]furan-1-one
78	PP_0034633	50.99518152	4.049999826	337.2345095	C20H32O4	Dihydroagathic acid
79	PP_0003402	288.6963743	17.66495993	319.1363822	C15H18N4O4	L-Asparaginyl-L-Tryptophan
80	PP_0022722	128.718248	0.531349759	231.1700421	C11H22N2O3	L-Isoleucyl-L-valine
81	PN_0002464	326.356595	102.4180636	191.0556463	C7H12O6	Quinic acid
82	PN_0020133	63.28331237	0.451434709	447.0930307	C21H20O11	Cynaroside | Trifolin | Trifolin
83	PN_0012908	75.04621631	0.306312832	161.0238263	C9H6O3	4-Hydroxycoumarin
84	PP_0018742	66.36845452	0.454034524	176.0915438	C7H13NO4	alpha-aminopimelic acid
85	PP_0040875	111.0373505	0.396611947	203.1389725	C9H18N2O3	L-Leucyl-L-alanine
86	PP_0015953	98.75431742	64.72414414	337.1039874	C20H16O5	Carpachromene
87	PP_0003958	96.50021411	18.81638845	169.0970767	C8H12N2O2	cyclo(Pro-Ala)
88	PP_0021814	144.9360813	14.22257462	197.1283933	C10H16N2O2	3-Isopropylhexahydropyrrolo[1,2-a]pyrazine-1,4-dione
89	PN_0012335	87.3002282	40.10759242	283.0685679	C10H12N4O6	Xanthosine
90	PP_0010598	38.04814673	4.434842095	295.1287044	C14H18N2O5	L-Phenylalanyl-L-glutamic acid
91	PP_0037190	276.0020183	6.52603635	126.0549318	C6H7NO2	5-Hydroxy-2-pyridinemethanol
92	PP_0029693	36.64882511	17.13582778	311.1623812	C20H22O3	2-Hydroxy-3,6-diphenylcyclohexyl acetate
93	PP_0002640	48.82456829	26.32951543	262.1032436	C9H15N3O6	L-Glutaminyl-L-Aspartate
94	PP_0034696	71.13786412	74.09375432	237.1119853	C13H16O4	(2R)-8-Ethyl-7-hydroxy-5-methoxy-2-methyl-2,3-dihydro-4H-chromen-4-one
95	PN_0019408	21.4737641	15.88995304	263.1284681	C15H20O4	(E)-2,6-Dihydroxy-2-(2-hydroxy-4-methylphenyl)-6-methylhept-4-en-3-one | (S)-2-trans-abscisic acid
96	PN_0001176	84.55210882	0.292588222	477.1763311	C24H30O10	Oregonin
97	PN_0018939	192.0476625	0.828483162	239.0560077	C11H12O6	Eucomic acid, (-)-
98	PN_0016106	64.0543419	0.528976186	417.1189555	C21H22O9	Robutaside A
99	PP_0013330	57.13768918	0.202143742	140.1066241	C8H13NO	Tropinone
100	PP_0013350	35.48064063	0.125647373	391.1733178	C22H22N4O3	L-Tryptophyl-L-tryptophan
101	PP_0024263	62.28653622	0.404824414	485.2204505	C27H32O8	(-)-Chrodrimanin B
102	PP_0036206	55.18353785	4.352921914	262.1432638	C15H19NO3	Zinnimidine
103	PP_0011544	218.1829973	9.657120849	286.1430899	C17H19NO3	Piperine
104	PP_0037900	104.0864691	8.31067636	183.0511496	C6H6N4O3	1-Methyluric acid
105	PN_0013179	87.49095218	23.00324877	229.1441957	C12H22O4	Dodecanedioic acid
106	PN_0025425	75.15769009	0.174363257	467.2345726	C23H34O7	Methyl (1alpha,5xi,7alpha,11alpha,13alpha,14alpha)-7-acetoxy-1,11,14-trihydroxypimara-8,15-dien-18-oate
107	PP_0026064	159.0537449	7.465149232	211.143945	C11H18N2O2	cyclo(leucyl-prolyl) | cyclo(D)-Pro-(D)-Ile
108	PP_0041612	373.3508533	37.62377105	246.1808567	C11H23N3O3	L-Lysyl-L-valine
109	PN_0025394	107.2697467	10.81443346	167.0343763	C8H8O4	1-(2,4,6-Trihydroxyphenyl)ethanone
110	PP_0012745	30.00537529	0.111625565	273.0753115	C15H12O5	3-(2,6-Dihydroxyphenyl)-4-hydroxy-6-methyl-2-benzofuran-1(3H)-one
111	PP_0020130	71.15086438	9.490045287	172.1693275	C10H18O	Geraniol | Fenchyl alcohols
112	PN_0011786	99.03350311	9.984645167	160.0245476	C5H7NO5	N-Formyl-L-aspartic acid
113	PN_0000594	29.95619355	0.167023884	469.1348169	C20H24O10	Rutarin
114	PN_0027577	86.65350035	0.13503155	501.3221392	C30H46O6	IlexgeninA
115	PP_0043340	43.91578197	52.08693199	247.1285556	C10H18N2O5	L-Aspartyl-L-leucine
116	PN_0012312	65.5066528	13.84358056	323.0260243	C9H13N2O9P	Uridine 5prime-monophosphate
117	PP_0024201	168.03751	17.62126492	348.0699688	C10H14N5O7P	Adenosine monophosphate
118	PN_0019337	94.6218098	30.22745867	403.1578992	C25H24O5	5-Hydroxy-8,8-dimethyl-6-(2-methylbutanoyl)-4-phenylpyrano[2,3-h]chromen-2-one
119	PP_0040158	73.23871752	9.676600256	250.1775752	C15H23NO2	5-Butyl-4-hydroxy-3-methyl-6-(3-methyl-2-buten-1-yl)-2(1H)-pyridinone
120	PP_0024659	73.8762537	8.424646296	203.0523963	C6H12O6	D-Tagatose | alpha-D-Talose | D-chiro-Inositol | D-chiro-Inositol
121	PP_0022520	47.41361012	0.251465217	209.08083	C11H12O4	3,5-Dimethoxycinnamic acid
122	PP_0010960	71.11125305	0.829685241	175.1076226	C7H14N2O3	L-Valylglycine
123	PN_0026374	25.81068665	0.115490402	329.1738617	C20H26O4	7-[2-(3-Furyl)ethyl]-5-hydroxy-7,8-dimethyl-6,6a,7,8,9,10-hexahydronaphtho[1,8a-c]furan-3(5H)-one | (6E,10Z,14E)-6,14-Dimethyl-3-methylidene-2-oxo-3a,4,5,8,9,12,13,15a-octahydrocyclotetradeca[b]furan-10-carboxylic acid
124	PP_0043325	79.63585998	0.808810114	127.050243	C5H6N2O2	Thymine
125	PN_0017206	195.7208016	10.21141585	437.2906105	C24H40O4	Hyodeoxycholic acid
126	PN_0004636	147.6242546	39.03267782	151.0391737	C8H8O3	2-Hydroxyphenylacetic acid
127	PN_0012946	52.70926887	5.132400028	293.175834	C17H26O4	[6]-Gingerol
128	PN_0025505	76.29852021	13.18922159	173.0813935	C8H14O4	Suberic acid
129	PN_0001232	62.76394471	0.128184507	431.0982781	C21H20O10	Saponaretin
130	PN_0024731	53.11335286	32.34627684	206.0818735	C11H13NO3	N-Acetyl-D-phenylalanine
131	PP_0040992	34.44184057	45.45010007	197.0806892	C10H12O4	4-Methoxymelilotic acid
132	PP_0036560	61.57957648	0.153861109	387.1074874	C20H18O8	3-Methoxy-7-(2,4',6-trihydroxy-3-methoxy-4-biphenylyl)-3,4-dihydro-2,5-oxepinedione
133	PP_0046092	74.48492457	35.83959961	177.1019227	C10H12N2O	Serotonin
134	PP_0007887	49.02581245	17.72757539	177.060862	C4H8N4O4	Allantoic acid
135	PP_0021260	176.7162422	0.599732446	245.1857964	C12H24N2O3	L-Isoleucyl-L-isoleucine
136	PN_0011762	90.5560631	36.92468433	245.0928726	C13H14N2O3	N-Acetyltryptophane | DL-N-Acetyltryptophan
137	PN_0012168	46.45418205	7.592857762	171.0656533	C8H12O4	trans-Cyclohexane-1,2-dicarboxylic acid
138	PN_0011272	58.17609535	3.447728834	159.0766652	C6H12N2O3	Gly-gamma-aminobutyric acid
139	PN_0020193	31.25158506	0.168949347	159.1022049	C8H16O3	5-Hydroxyvalproic acid
140	PP_0020979	135.4887949	30.24600526	247.1439119	C14H18N2O2	3-(1H-Indol-3-yl)-2-(trimethylammonio)propanoate
141	PN_0014971	82.39231352	0.598322588	469.134926	C20H24O10	(9S,10R)-10-Hydroxy-8,8-dimethyl-2-oxo-9,10-dihydro-2H,8H-pyrano[2,3-f]chromen-9-yl-beta-D-glucopyranoside
142	PN_0013701	50.99764671	0.735323521	211.0817893	C8H12N4O3	Glycyl-L-histidine
143	PN_0027204	169.8952465	2.124190286	421.1480371	C20H24O7	[2,3-Dihydroxy-1-(7-methoxy-2-oxochromen-6-yl)-3-methylbutyl] 3-methylbut-2-enoate | [1,3-Dihydroxy-1-(7-methoxy-2-oxochromen-6-yl)-3-methylbutan-2-yl] (E)-2-methylbut-2-enoate | 1,3-Dihydroxy-1-(7-methoxy-2-oxo-2H-chromen-6-yl)-3-methyl-2-butanyl (2Z)-2-methyl-2-butenoate
144	PP_0004489	109.5792398	13.18402611	239.1267759	C13H18O4	1-(3-Ethyl-2,4-dihydroxy-6-methoxyphenyl)butan-1-one
145	PP_0040367	34.15359796	0.216270763	250.1289716	C14H19NOS	(2E,4E)-N-(2-Methylpropyl)-6-thiophen-2-ylhexa-2,4-dienamide
146	PP_0029087	36.57032275	0.173805154	273.0736043	C15H12O5	Microminutin
147	PP_0037875	121.203366	13.79681255	168.1018217	C9H13NO2	3-Methoxytyramine
148	PP_0044320	35.97609402	11.27120109	265.084978	C9H16N2O5S	L-Aspartyl-L-methionine
149	PP_0016598	93.86856536	1.464065093	415.2109622	C24H32O7	Schisandrin
150	PN_0027082	90.67155158	0.365192224	349.2019139	C20H30O5	(7E,11E)-14-Ethyl-13-hydroxy-3,5,7,9,13-pentamethyloxacyclotetradeca-7,11-diene-2,6,10-trione
151	PN_0001361	55.5018384	80.82741497	213.1129456	C11H18O4	(E)-Undec-2-enedioic acid
152	PN_0016367	421.6364544	82.24934873	179.0569299	C7H8N4O2	Theophylline
153	PP_0013336	85.77402785	1.080789392	197.0668625	C7H8N4O3	1,7-Dimethyluric acid
154	PP_0042474	45.31134104	0.152961661	715.3844214	C32H58O17	5-[3-Hydroxy-5-[3,4,5-trihydroxy-6-(hydroxymethyl)oxan-2-yl]oxydecanoyl]oxy-3-[3,4,5-trihydroxy-6-(hydroxymethyl)oxan-2-yl]oxydecanoic acid
155	PN_0014981	64.59125048	0.154027541	607.3486036	C32H50O8	(1S,2S,8xi,9beta,16alpha,17xi)-1,2,16,20-Tetrahydroxy-9,10,14-trimethyl-11,22-dioxo-4,9-cyclo-9,10-secocholest-5-en-25-yl acetate
156	PP_0018749	76.73044529	50.98314597	142.0972333	C6H11N3O	L-Histidinol
157	PN_0024239	39.39173087	4.067614934	222.0768445	C11H13NO4	N-Acetyltyrosine
158	PP_0032400	175.7254168	0.391664987	406.247472	C25H31N3O2	Maytenine
159	PP_0043326	40.33778429	10.40811099	182.0810608	C9H11NO3	L-Tyrosine | 3-Amino-3-(4-hydroxyphenyl)propanoic acid
160	PP_0028694	102.0730798	14.88968377	247.1076316	C13H14N2O3	Indole-3-acetyl-alanine
161	PP_0007892	101.6193629	14.09402493	134.0447474	C4H7NO4	Aspartic acid | Iminodiacetic acid
162	PP_0016483	69.92336291	0.15767082	176.0726217	C10H9NO2	4-Methoxy-2H-isoquinolin-1-one
163	PP_0042823	70.45339198	14.71215153	126.0661361	C5H7N3O	5-Methylcytosine
164	PP_0043304	92.39227238	8.890666023	168.0995994	C9H13NO2	Synephrine
165	PP_0024186	50.93009043	5.652639812	282.1303565	C14H19NO5	Harzianopyridone
166	PN_0016232	159.0777318	51.49233001	379.1580405	C23H24O5	7-[(2E)-3,7-Dimethylocta-2,6-dienoxy]-1,3-dihydroxyxanthen-9-one
167	PP_0027751	56.05838368	9.731090074	311.1634925	C20H22O3	(4R)-4-Ethenyl-4,10-dimethyl-2-(2-methylprop-1-enyl)-2,3-dihydropyrano[3,2-c]chromen-5-one
168	PP_0029168	209.1772009	5.32588225	179.0698793	C10H10O3	4-Methoxycinnamic acid
169	PN_0015440	93.6280162	0.769938881	523.2184986	C26H36O11	[3,4,5-trihydroxy-6-[4-(2,6,6-trimethyl-4-oxocyclohex-2-en-1-yl)butan-2-yloxy]oxan-2-yl]methyl 3,4,5-trihydroxybenzoate
170	PP_0041358	153.2403304	4.057432703	328.3195568	C20H41NO2	N,N-Dimethylsphing-4-enine
171	PP_0005379	56.61024126	19.87795595	133.0971215	C5H12N2O2	L-Ornithine
172	PN_0012419	48.43763002	49.4859454	129.0551677	C6H10O3	(S)-3-Methyl-2-oxopentanoic acid
173	PN_0015756	54.42880866	0.287905131	343.1402538	C16H24O8	2-[2-Hydroxy-1-(4-methoxyphenyl)propoxy]-6-(hydroxymethyl)oxane-3,4,5-triol
174	PP_0013371	73.30607561	0.319683267	529.247462	C29H36O9	Methyl acetoxy[(1S,3S,7R,9R,12S,13S)-13-(3-furyl)-6,6,8,12-tetramethyl-17-methylene-5,15-dioxo-2,14-dioxatetracyclo[7.7.1.0~1,12~.0~3,8~]heptadec-7-yl]acetate
175	PN_0017297	224.8211608	24.62794227	448.3067725	C26H43NO5	Glycochenodeoxycholic acid
176	PP_0036940	30.22254065	0.118059659	164.0738611	C6H14NO2S+	L-Methionine methylsulfonium
177	PP_0018772	97.67960571	0.810508612	221.0925599	C8H16N2O3S	L-Alanyl-L-methionine | L-Methionyl-L-alanine
178	PP_0024231	47.55080875	1.201038514	165.0657646	C8H8N2O2	Ricinine
179	PP_0018293	39.45147226	13.4733576	352.1652573	C20H21N3O3	L-Phenylalanyl-L-tryptophan | L-Tryptophyl-L-phenylalanine
180	PN_0026350	88.61378056	58.88730287	236.0924111	C12H15NO4	2-Acetamido-3-(4-methoxyphenyl)propanoic acid
181	PN_0020671	75.92539724	0.381441853	140.0108623	C2H8NO4P	O-Phosphorylethanolamine
182	PP_0004250	130.6574032	19.32103839	146.0923232	C5H11N3O2	4-Guanidinobutyric acid
183	PN_0013400	87.97108754	5.744321865	357.1039057	C12H22O12	Lactobionic acid
184	PP_0024222	66.10104366	0.838976448	335.2187573	C20H30O4	Prostaglandin B2
185	PP_0023193	31.05624455	1.703020871	329.1380114	C19H22O6	(+)-Gibberellic acid
186	PN_0016359	154.7323173	2.591727898	335.2228011	C20H32O4	(2E,6E,10Z)-12-Hydroxy-10-(hydroxymethyl)-6-methyl-2-(4-methyl-3-penten-1-yl)-2,6,10-dodecatrienoic acid
187	PP_0022529	108.9731274	1.220386453	293.2101867	C18H28O3	8-[3-Oxo-2-[(E)-pent-2-enyl]cyclopenten-1-yl]octanoic acid
188	PP_0043255	94.18092059	0.118468478	315.1588308	C19H22O4	Chalepin
189	PN_0011076	81.36013903	61.73646948	209.0296774	C6H10O8	D-Saccharic acid
190	PN_0021893	65.17909473	0.338488808	261.0381284	C6H15O9P	D-Sorbitol 6-phosphate
191	PP_0036091	94.14471558	22.24338427	137.045699	C5H4N4O	Hypoxanthine
192	PP_0021767	57.01269276	14.5503577	279.1696294	C15H22N2O3	L-Leucyl-L-phenylalanine | L-Phenylalanyl-L-leucine
193	PP_0013255	51.69555637	11.22306395	104.1072107	C5H14NO+	Choline
194	PN_0025342	48.05244994	25.59462254	329.2332019	C18H34O5	(9Z)-5,8,11-Trihydroxy-9-octadecenoic acid
195	PN_0015904	90.26004663	0.42243927	447.093356	C21H20O11	Kaempferol-7-O-D-glucopyranoside
196	PN_0000702	51.34834993	0.403152351	329.1758332	C20H26O4	3-(2,5-Dihydroxy-6-methyl-3-propan-2-ylphenyl)-2-methyl-5-propan-2-ylbenzene-1,4-diol
197	PN_0022676	45.90282436	0.260796552	369.0825753	C15H16O8	Skimmin
198	PP_0037856	27.30657224	0.684555087	355.1002828	C16H18O9	Cryptochlorogenic acid
199	PP_0025834	92.0752285	17.11201253	176.070522	C10H9NO2	Indole-3-acetic acid
200	PN_0004822	127.739956	104.2688828	171.0270282	C4H8O3	4-Hydroxybutyric acid
201	PN_0015050	20.77165793	0.137067596	269.1759544	C15H26O4	(2E)-2-Decyl-2-pentenedioic acid
202	PP_0041278	77.3426321	37.44995986	189.1231308	C8H16N2O3	L-Leucylglycine
203	PP_0029553	34.34996985	4.805814549	339.1621578	C21H22O4	Bavachinin
204	PP_0021842	52.18065762	15.18485433	189.1232087	C8H16N2O3	L-Valyl-L-alanine
205	PP_0007897	102.904918	15.43906369	148.0602973	C5H9NO4	L-Glutaminic acid
206	PP_0032459	59.30016974	9.650290079	106.0501447	C3H7NO3	L-Serine
207	PP_0026790	148.2050318	1.603850461	233.1130058	C9H16N2O5	L-Valyl-L-aspartic acid
208	PP_0017383	281.524509	8.523720315	153.0406034	C5H4N4O2	Xanthine
209	PP_0017741	106.9859768	10.28852232	225.0979716	C9H12N4O3	Temorine
210	PN_0015912	262.3422155	47.6845059	161.044758	C6H10O5	3-Hydroxy-3-methylglutaric acid
211	PP_0005399	55.42771521	0.784097828	290.145545	C10H19N5O5	L-Aspartyl-L-arginine | L-Arginyl-L-aspartic acid
212	PP_0028157	36.49452975	2.794286864	295.1679053	C20H22O2	Longistylin C
213	PN_0019991	95.21915521	18.857182	204.1237076	C9H19NO4	D-Panthenol
214	PP_0041997	55.80833431	18.37411386	298.0965218	C11H15N5O3S	5prime-Methylthioadenosine
215	PP_0024779	74.59145322	0.381497834	447.0915873	C21H18O11	Baicalin
216	PP_0024232	86.84975856	17.90504692	191.0660305	C6H10N2O5	L-Aspartylglycine | Glycyl-L-aspartic acid
217	PP_0021229	125.6067215	0.687894679	239.091469	C12H14O5	Curvulin
218	PP_0023276	58.01730936	0.177333641	279.1694776	C15H22N2O3	L-Phenylalanyl-L-isoleucine
219	PP_0024852	87.6905008	34.19403414	283.1034091	C11H14N4O5	9-(3-O-Methylpentofuranosyl)-1,9-dihydro-6H-purin-6-one
220	PN_0015632	66.72205614	0.17919038	325.1647379	C17H26O6	2-(1-Carboxyundec-10-enyl)-5-oxooxolane-2-carboxylic acid
221	PP_0046097	27.99480023	6.450411201	249.0714409	C8H12N2O7	L-Aspartyl-L-aspartic acid
222	PP_0002493	42.07645532	10.48201318	166.0861352	C9H11NO2	4-Hydroxy-1-(3-pyridinyl)-1-butanone
223	PP_0004661	60.6457674	0.11922958	347.221086	C21H30O4	11-Deoxy-17-hydroxycorticosterone | (9xi,11beta,14xi)-11,21-Dihydroxypregn-4-ene-3,20-dione
224	PP_0029951	102.5384834	16.93479631	194.0481611	C6H11NO4S	S-(2-Carboxyethyl)cysteine
225	PN_0004642	109.0208634	0.234259099	175.0606184	C7H12O5	(2S)-2-Isopropylmalic acid
226	PN_0000683	68.13737055	0.087781981	625.2591189	C34H42O11	16-(1-Acetoxy-2-methoxy-2-oxoethyl)-6-(3-furyl)-13-hydroxy-1,5,15,15-tetramethyl-8,17-dioxo-7-oxatetracyclo[11.3.1.02,11.05,10]heptadec-10-en-14-yl (2E)-2-methyl-2-butenoate
227	PP_0035847	35.571102	2.214898803	318.1809494	C17H23N3O3	L-Tryptophyl-L-leucine
228	PP_0015906	226.1322978	1.878682988	330.166307	C19H23NO4	Sinomenine
229	PP_0032480	74.74100815	12.93380094	322.1867868	C15H23N5O3	L-Arginyl-L-phenylalanine
230	PN_0021807	48.09534594	5.330396924	241.0916781	C9H14N4O4	L-Histidyl-L-serine
231	PP_0028531	31.06772183	0.198268759	529.2071369	C28H32O10	(4aS,8aR,8bR,9aS,12S,12aS,14bR)-12-(3-Furyl)-6,6,8a,12a-tetramethyl-3,8,10-trioxotetradecahydro-3H-oxireno[d]pyrano[4',3':3,3a][2]benzofuro[5,4-f]isochromen-7-yl acetate
232	PP_0018755	112.2287271	27.83841852	132.0654988	C5H9NO3	trans-3-Hydroxy-L-proline
233	PN_0027438	80.9552392	63.23754075	331.1891207	C20H28O4	5-[2-(Furan-3-yl)ethyl]-8-hydroxy-5,6,8a-trimethyl-3,4,4a,6,7,8-hexahydronaphthalene-1-carboxylic acid
234	PN_0015848	51.97693507	5.438010094	243.1962698	C14H28O3	2S-Hydroxytetradecanoic acid
235	PP_0037163	147.8739175	0.53449752	164.0917687	C6H13NO4	Deoxymannojirimycin
236	PN_0026959	63.67332905	25.7481772	505.9939531	C10H16N5O13P3	Deoxyguanosine triphosphate
237	PP_0017235	53.08887252	0.207816969	301.1042431	C17H16O5	8-Hydroxy-5,7-dimethoxy-2-phenyl-2,3-dihydro-4H-chromen-4-one
238	PP_0011644	175.7619728	5.030972449	317.2106672	C20H28O3	(5xi,13alpha)-7-Oxopimara-8,15-dien-18-oic acid
239	PP_0007949	96.00779723	4.702120524	611.1608062	C27H30O16	Rutin | 5,7-Dihydroxy-2-(4-hydroxyphenyl)-4-oxo-4H-chromen-3-yl 2-O-hexopyranosylhexopyranoside
240	PP_0044128	53.58995624	0.704465699	516.3015018	C29H41NO7	2-[(2R,3S,7R,8R,8aS)-2,3,4'-trihydroxy-4,4,7,8a-tetramethyl-6'-oxospiro[2,3,4a,5,6,7-hexahydro-1H-naphthalene-8,2'-3,8-dihydrofuro[2,3-e]isoindole]-7'-yl]-3-methylpentanoic acid
241	PP_0017521	68.33453381	0.360623725	226.0708871	C10H11NO5	N-(2-Hydroxybenzoyl)-D-serine
242	PP_0021447	73.7052121	0.268568467	237.1843536	C15H26O3	(1aS,2S,6aS,7S,7aR)-7-(Hydroxymethyl)-3,3,6a,7a-tetramethyldecahydronaphtho[2,3-b]oxiren-2-ol
243	PN_0000898	66.14906843	5.820418631	361.1632175	C20H26O6	Acanthospermolide
244	PP_0043332	100.6779576	4.453628055	167.0562771	C6H6N4O2	7-Methylxanthine
245	PP_0040983	166.5612541	36.89690636	265.1907709	C15H24N2O2	Ammothamnine
246	PN_0024160	138.4427428	19.55976296	201.1128756	C10H18O4	Sebacic acid | Decanedioic acid
247	PN_0015093	55.59781514	24.92293273	117.01902	C4H6O4	Succinic acid
248	PN_0004510	70.01603037	45.45768768	142.0500618	C6H9NO3	(S)-6-Oxo-2-piperidinecarboxylic acid
249	PN_0016302	75.11852155	5.285492118	261.134217	C12H22O6	9-(2,3-Dihydroxypropoxy)-9-oxononanoic acid
250	PP_0032486	86.24046168	17.30379775	337.1042149	C20H16O5	Psoralidin
251	PP_0028383	362.9376482	4.35406952	576.3227832	C25H45N5O10	5-[[4-[5-[[4-[5-[Acetyl(hydroxy)amino]pentylamino]-4-oxobutanoyl]-hydroxyamino]pentylamino]-4-oxobutanoyl]-hydroxyamino]pentanoic acid
252	PP_0043305	40.99511084	7.95357723	157.0759205	C10H8N2	2,2prime-Bipyridine
253	PP_0003537	82.73568837	19.41815366	114.0663279	C4H7N3O	Creatinine
254	PP_0025188	23.3922272	2.022678909	370.1645669	C21H23NO5	6',7'-Dimethoxy-2'-methyl-3',4',6,8-tetrahydro-2'H-spiro[indeno[4,5-d][1,3]dioxole-7,1'-isoquinolin]-8-ol
255	PP_0032476	146.1448578	11.72391128	262.1395315	C10H19N3O5	L-Aspartyl-L-lysine
256	PP_0000112	63.57034262	65.49832182	205.0921603	C3H6N2O2	L-Cycloserine
257	PP_0026677	68.44250869	7.280747107	304.1611712	C11H21N5O5	L-Glutamyl-L-Arginine | L-Arginyl-L-glutamic acid
258	PN_0023984	70.61436359	0.314417517	507.1510859	C24H28O12	Scutellarioside II
259	PP_0012014	123.2275593	1.095438675	251.1636158	C15H22O3	(4aR,5S,8aS,9aR)-9a-Hydroxy-3,4a,5-trimethyl-4a,5,6,7,8,8a,9,9a-octahydronaphtho[2,3-b]furan-2(4H)-one
260	PN_0017256	79.61929396	23.68142898	204.066263	C11H11NO3	N-Cinnamoylglycine
261	PN_0013829	102.072458	0.481835379	477.1037911	C22H22O12	5,7-dihydroxy-2-[4-hydroxy-3-[(2S,3R,4S,5S,6R)-3,4,5-trihydroxy-6-(hydroxymethyl)oxan-2-yl]oxyphenyl]-3-methoxychromen-4-one
262	PP_0004870	241.7823638	129.8062247	195.0875936	C8H10N4O2	Caffeine
263	PP_0011622	78.54202024	4.256939563	276.155166	C11H21N3O5	L-Lysyl-L-glutamic acid
264	PP_0032456	49.50999518	10.52413681	147.1126771	C6H14N2O2	L-Lysine
265	PP_0024483	77.22712156	0.412287961	271.062501	C15H10O5	Norwogonin
266	PP_0021487	114.8293406	13.30864568	175.1076465	C7H14N2O3	N-gamma-Ethyl-L-glutamine
267	PN_0026571	124.0328569	10.71268216	225.0612053	C6H12O6	muco-Inositol
268	PN_0013619	85.20125425	11.17523443	203.0667862	C7H12N2O5	Glycyl-L-glutamic acid | L-Alanyl-L-aspartic acid
269	PP_0033514	55.36362017	23.3640559	583.253593	C30H40O10	Methyl (4aR,4bR,5R,6R,10aR,12aS)-5,6-diacetyloxy-2,4b,7,7,10a,12a-hexamethyl-12-methylidene-1,4,8-trioxo-4a,5,6,6a,9,10,10b,11-octahydronaphtho[1,2-h]isochromene-2-carboxylate
270	PP_0007898	41.52320778	13.24603809	205.0969727	C11H12N2O2	L-Tryptophan
271	PN_0011798	43.47714548	20.3065625	176.0381398	C6H11NO3S	N-Formyl-L-methionine
272	PP_0007904	29.05421652	0.071850474	142.1223362	C8H15NO	Tropine
273	PN_0002063	26.57001237	0.111177603	299.1864492	C15H26O3	(1S,6S,8R,11R)-6-(Hydroxymethyl)-2,6,9-trimethyltricyclo[5.4.0.0^(2,9)]undecane-8,11-diol
274	PN_0016114	19.28068555	18.30696842	270.1707519	C14H25NO4	4-Oxo-4-(3-oxodecan-2-ylamino)butanoic acid
275	PN_0012635	47.04645994	0.153595996	375.1296355	C16H24O10	Loganate
276	PP_0016960	100.6081875	2.557768345	306.1686923	C17H23NO4	Anisodamine
277	PN_0016231	118.0072701	1.174259348	241.0866399	C15H14O3	4-Vinylsyringol
278	PP_0002243	41.10405263	0.193865208	237.1231558	C12H16N2O3	L-Alanyl-L-phenylalanine
279	PN_0027037	65.44133941	8.481240854	241.1442294	C13H22O4	(2Z)-2-Octyl-2-pentenedioic acid
280	PN_0027629	42.16266358	6.680060789	166.0125488	C7H5NO4	Quinolinic acid
281	PP_0016160	60.27540592	0.212307586	461.106965	C22H20O11	Oroxyloside
282	PN_0013170	46.93424089	5.212825211	275.0885084	C10H16N2O7	L-Glutamyl-L-glutamic acid
283	PP_0035240	33.61955466	20.90742745	321.2423921	C20H32O3	6-Oxocativic acid
284	PP_0018768	34.32022947	0.154585721	204.1016594	C12H13NO2	Indole-3-butyric acid
285	PN_0012061	1884.88452	42.12097386	181.0710286	C6H14O6	Sorbitol | Galactitol
286	PP_0002526	59.50704037	12.67143291	136.0617782	C5H5N5	Adenine
287	PP_0032387	151.8964811	43.80556862	230.0958189	C9H16N3O2S	Ergothioneine
288	PN_0026288	62.7947109	0.146409932	239.1285125	C13H20O4	5-[(1E,3E)-1,3-Heptadien-1-yl]-2,3-dihydroxycyclopentanecarboxylic acid
289	PP_0046041	97.81428741	16.9697463	137.0708831	C7H9N2O+	1-Methylnicotinamide
290	PN_0012192	46.23784129	14.71037366	402.9959879	C9H14N2O12P2	Uridine 5prime-diphosphate
291	PN_0018909	68.68513586	0.374424952	369.0825445	C16H18O10	Fraxin
292	PN_0002616	69.53673366	0.767879355	249.1492756	C15H22O3	2-[(2S,4aR,8aS)-2-Hydroxy-4a-methyl-8-methylidene-3,4,5,6,7,8a-hexahydro-1H-naphthalen-2-yl]prop-2-enoic acid
293	PP_0004555	119.7121825	25.61204326	219.0473057	C6H12O7	D-Gluconic acid
294	PP_0022425	116.9052866	8.176954333	311.1263067	C19H18O4	Ovalitenin B
295	PP_0003762	78.53830875	4.274690483	276.1551647	C11H21N3O5	L-Glutamyl-L-lysine | L-Lysyl-L-glutamic acid
296	PP_0035703	37.34773369	21.027001	207.0987955	C7H14N2O5	L-Seryl-L-threonine
297	PP_0028448	71.11162553	16.20187103	163.1227823	C10H14N2	Nicotine
298	PN_0019581	44.00820111	9.395025799	187.1082421	C8H16N2O3	N-epsilon-Acetyl-L-lysine
299	PN_0004984	40.24195177	28.11343345	426.0120039	C10H14N5O10PS	Adenosine 5prime-Phosphosulfate
300	PP_0003106	144.2044013	258.4789865	177.1021176	C10H12N2O	(S)-(-)-Cotinine
301	PN_0015731	87.39072543	0.325392695	297.0400787	C16H10O6	2-Anthracenecarboxylic acid
302	PP_0038934	114.1042227	0.669331954	393.1161624	C17H22O9	Sinapaldehyde glucoside
303	PN_0025977	105.8320805	17.902222	151.0602585	C5H12O5	Xylitol | L-(-)-Arabitol
304	PP_0004195	65.28215647	1.175750487	487.1615774	C25H26O10	(3R)-4-[6-[(2R,4R,5S,6R)-4,5-Dihydroxy-6-methyloxan-2-yl]-1,5-dihydroxy-9,10-dioxoanthracen-2-yl]-3-hydroxy-3-methylbutanoic acid
305	PP_0017602	44.1698756	46.21943998	212.0428318	C4H10N3O5P	Phosphocreatine
306	PN_0026553	91.26773744	0.394645212	447.0935308	C21H20O11	Quercitrin
307	PP_0026364	62.10581006	0.204949541	245.1280969	C14H16N2O2	3-Benzylhexahydropyrrolo[1,2-a]pyrazine-1,4-dione
308	PN_0027339	28.0876942	19.6368207	239.0537992	C11H12O6	Lignicol
309	PP_0023264	62.38237277	18.76636896	400.3414393	C23H46NO4+	O-Palmitoyl-L-carnitine
310	PN_0016225	101.4514163	1.017560015	439.1610688	C20H26O8	(2E,5R,7S,10R,14R)-2-Ethylidene-14-hydroxy-10-(methoxymethyl)-5,14-dimethyl-4,8,17-trioxatetracyclo[9.5.1.01,5.07,11]heptadecane-3,9,12-trione
311	PN_0017759	101.8232066	30.35935915	211.0972258	C10H14O2	Rhododendrol
312	PP_0013347	72.94792115	10.70405248	173.09202	C7H12N2O3	L-Prolylglycine
313	PP_0003337	58.40770137	6.914600775	245.1857294	C12H24N2O3	L-Leucyl-L-leucine | L-Isoleucyl-L-leucine | L-Leucyl-L-isoleucine
314	PP_0032447	50.843105	8.080418144	118.0863233	C5H11NO2	Betaine
315	PN_0015888	42.49063187	0.140711436	487.3424456	C30H48O5	Barbinervic acid
316	PN_0013812	109.9796112	1.313949993	333.2070613	C20H30O4	(E)-2-[2-(1,2,4a,5-Tetramethyl-2,3,4,7,8,8a-hexahydronaphthalen-1-yl)ethyl]but-2-enedioic acid
317	PN_0020503	42.46711154	10.54550382	407.2075099	C21H30O5	Hydrocortisone
318	PP_0005376	106.0995573	34.67552943	173.0920494	C7H12N2O3	Glycyl-L-proline
319	PP_0021076	131.2272916	6.877422101	219.0973411	C8H14N2O5	L-Alanyl-L-glutamic acid
320	PN_0000773	29.07621521	1.266097836	377.1576737	C20H26O7	[(3aS,6R,7S,8S,8aR)-7-[(E)-but-2-enoyl]-7-Hydroxy-6-methyl-3-methylidene-2,5-dioxo-4,6,8,8a-tetrahydro-3aH-cyclohepta[b]furan-8-yl] 2-methylbutanoate
321	PP_0024240	97.9565529	61.60528225	242.12459	C9H15N5O3	Tetrahydrobiopterin
322	PP_0040641	72.42107251	0.177299288	265.1431814	C15H20O4	(3aR,4aS,5R,7aS,8S,9aR)-5-Hydroxy-4a,8-dimethyl-3-methyleneoctahydroazuleno[6,5-b]furan-2,6(3H,4H)-dione
323	PN_0004329	50.50509994	9.442469718	478.1665604	C23H28ClNO5	Isochromophilone VI
324	PN_0004654	239.6373777	32.05330518	145.0499333	C6H10O4	2-Methylglutaric acid | 3-Methylglutaric acid
325	PP_0017520	45.56799224	10.78322165	175.1188804	C6H14N4O2	Arginine
326	PP_0022889	76.82075712	0.250434009	144.04782	C6H9NOS	4-Methyl-5-thiazolethanol
327	PP_0017187	37.21985378	21.6267386	207.098806	C7H14N2O5	L-Threonyl-L-serine
328	PP_0005310	57.12449849	17.40273879	146.117443	C7H16NO2+	Acetylcholine | (3-Carboxypropyl)trimethylammonium
329	PN_0018471	53.49468717	67.20183403	439.1608206	C20H26O8	(3aR,4S,5aR,6R,9bR)-9-Formyl-6-hydroxy-5a-methyl-3-methylene-2-oxododecahydronaphtho[1,2-b]furan-4-yl 3,4-dihydroxy-2-methylenebutanoate | [(2R,3R,4S,5R,6R)-3,5-Dihydroxy-2-(2-hydroxycyclohexyl)oxy-6-(hydroxymethyl)oxan-4-yl] (E)-3-(3,4-dihydroxyphenyl)prop-2-enoate | Grandidentoside
330	PP_0024217	71.03189966	0.139375839	289.2155436	C19H28O2	Testosterone
331	PN_0022780	75.2656169	24.7157762	321.0765422	C19H14O5	Tetrangomycin
332	PN_0024240	48.24151066	20.07424111	190.0539257	C7H13NO3S	N-Acetyl-L-methionine
333	PN_0014052	64.19940334	2.380850085	549.1671626	C18H32O16	Panose | Maltotriose
334	PP_0012572	66.91768013	63.37990717	275.1255928	C16H18O4	O-Methylcedrelopsin
335	PP_0023414	46.94910098	0.778118812	306.278968	C20H35NO	(2E,4E,10Z)-N-Isobutyl-2,4,10-hexadecatrienamide
336	PP_0029207	68.60588712	21.67282313	473.3619984	C30H48O4	(2alpha,3alpha,5xi,9xi)-2,3-Dihydroxyurs-12-en-28-oic acid
337	PN_0010896	63.64637631	63.86064675	215.1649161	C12H24O3	beta-Hydroxylauric acid
338	PP_0028970	52.40843638	0.412496558	277.1794316	C17H24O3	Shogaol
339	PN_0003287	104.4956256	24.54156042	253.1079632	C13H18O5	Phomalone
340	PN_0004816	42.86337925	78.21808278	197.0450633	C9H10O5	Vanillylmandelic acid
341	PP_0016024	60.70432097	13.02833952	313.154293	C18H20N2O3	L-Phenylalanyl-L-phenylalanine
342	PN_0014585	362.7575628	159.440004	194.0454318	C9H9NO4	O-Hydroxyhippuric acid
343	PP_0043263	23.58225598	0.068898126	722.452772	C39H63NO11	Spirosol-5-en-3-yl 4-O-(6-deoxy-alpha-L-mannopyranosyl)-beta-D-glucopyranoside
344	PN_0017024	89.73692755	1.413180056	205.0866701	C12H14O3	4-Hydroxy-3-(3-methylbut-2-enyl)benzoic acid
345	PN_0024877	194.9474341	0.777684606	421.1545791	C20H24O7	[2,3-Dihydroxy-1-(7-methoxy-2-oxochromen-6-yl)-3-methylbutyl] (Z)-2-methylbut-2-enoate | [1,3-Dihydroxy-1-(7-methoxy-2-oxochromen-6-yl)-3-methylbutan-2-yl] (Z)-2-methylbut-2-enoate
346	PP_0002895	55.68686438	2718.85847	293.0969084	C10H16N2O8	Ethylenediaminetetraacetic acid
347	PN_0019567	54.10864785	18.66054795	171.0055838	C3H9O6P	Glycerol-3-phosphate
348	PN_0022491	57.77537964	0.47983823	359.150009	C20H24O6	[(3aR,4R,5R,6E,9Z,11aR)-4-Hydroxy-6,10-dimethyl-3-methylidene-2,8-dioxo-4,5,11,11a-tetrahydro-3aH-cyclodeca[b]furan-5-yl] (Z)-2-methylbut-2-enoate
349	PP_0033448	62.89268027	15.17580336	621.2709455	C33H42O10	(3aS,3bS,4R,4aR,6S,7S,7aR,8R,8aR,9aS)-4,8,9a-Triacetoxy-4a-hydroxy-2,2,3b,6,8a-pentamethyl-1-oxotetradecahydro-1H-cyclopenta[a]-s-indacen-7-yl benzoate
350	PP_0032449	45.18354285	11.07385107	132.1018221	C6H13NO2	Norleucine
351	PN_0019054	48.80707914	26.67997982	329.2331847	C18H34O5	(15Z)-9,12,13-Trihydroxy-15-octadecenoic acid
352	PP_0035278	172.9903178	0.63134261	215.1388338	C10H18N2O3	L-Prolyl-L-valine
353	PP_0012386	275.4091782	39.4756132	365.105097	C12H22O11	Turanose
354	PP_0023494	79.37851409	6.624718765	102.0552125	C4H7NO2	Homoserine lactone | 1-Aminocyclopropanecarboxylic acid
355	PP_0012605	127.4660394	0.559783362	180.1016619	C10H13NO2	Fusaric acid
356	PP_0012382	62.88698245	0.138373967	265.1112363	C12H17N4OS+	Thiamine
357	PN_0013764	117.8299225	0.388368216	165.0550428	C8H8O	Phenylacetaldehyde
358	PN_0022725	112.5696035	1.827189051	991.5492755	C48H82O18	(3beta,5xi,9xi,12beta,13xi)-20-{[6-O-(beta-D-Glucopyranosyl)-beta-D-glucopyranosyl]oxy}-12-hydroxydammar-24-en-3-yl beta-D-glucopyranoside
359	PN_0021742	49.30930904	0.162247441	173.0449488	C7H10O5	(-)-Shikimic acid
360	PP_0007274	195.1246313	1.327792369	199.0963371	C16H24O9	1-(beta-D-Glucopyranosyloxy)-7-methyl-1,4a,5,6,7,7a-hexahydrocyclopenta[c]pyran-4-carboxylic acid
361	PP_0003417	36.66578253	10.80878748	159.0915793	C10H10N2	Nicotyrine
362	PN_0005038	103.2398965	11.36746735	157.0359337	C4H6N4O3	Allantoin
363	PP_0003192	101.1676116	16.30694516	136.0426623	C4H9NO2S	L-Homocysteine
364	PP_0018039	70.22567722	20.48290909	185.041863	C6H10O5	Levoglucosan
365	PP_0017048	85.43253738	1.141208185	275.1710118	C11H22N4O4	L-Lysyl-L-glutamine
366	PP_0028607	50.50151959	8.054462811	260.0528198	C6H14NO8P	D-Glucosamine-6-phosphate
367	PP_0027766	101.2881868	8.01387701	123.0553217	C6H6N2O	Nicotinamide | Isonicotinamide
368	PP_0029231	44.72760709	9.609290508	233.1130008	C9H16N2O5	L-Aspartyl-L-valine
369	PN_0017835	26.1486024	0.093853942	487.3426393	C30H48O5	2,3,23-Trihydroxyolean-12-en-28-oic acid | (3beta,5xi,9xi)-3,6,19-Trihydroxyurs-12-en-28-oic acid | (2alpha,3beta,5xi,9xi)-2,3,19-Trihydroxyurs-12-en-28-oic acid | (1S,4aR,6aS,6bR,10R,11R,12aR,14bS)-1,10,11-Trihydroxy-2,2,6a,6b,9,9,12a-heptamethyl-1,3,4,5,6,6a,7,8,8a,10,11,12,13,14b-tetradecahydropicene-4a-carboxylic acid
370	PP_0044974	73.25332083	14.15590817	220.1178333	C9H17NO5	Pantothenic acid
371	PP_0037882	57.07597234	14.9565152	130.0498645	C5H7NO3	Pyroglutamic acid
372	PN_0019631	197.9540057	43.4403688	195.0505294	C6H12O7	D-Galactonic acid
373	PN_0011726	134.8787901	14.22672027	173.0925486	C7H14N2O3	N-Acetyl-L-ornithine
374	PP_0038921	32.12373805	0.155734234	213.0733508	C8H14O5	Dimethyl 3-hydroxy-3-methylpentanedioate
375	PP_0028382	47.65992617	12.97824291	540.3654545	C28H49N3O7	13-Hydroxy-6-(1-hydroxyethyl)-9-isopropyl-12,14-dimethyl-3-methylene-15-nonyl-1-oxa-4,7,10-triazacyclopentadecane-2,5,8,11-tetrone
376	PP_0034979	107.4598707	1.910636614	155.0813368	C7H10N2O2	cyclo(Gly-Pro)
377	PP_0009003	116.7320387	0.486833029	335.1101679	C15H20O7	Sachaliside
378	PP_0004006	181.854159	0.594615503	138.091103	C8H11NO	Tyramine
379	PP_0039584	650.2847178	237.6155704	400.2177439	C16H30O10	3-Methylbutyl 6-O-alpha-L-arabinopyranosyl-beta-D-glucopyranoside
380	PN_0015542	113.76436	32.97331206	271.0639399	C15H12O5	Griseoxanthone C
381	PP_0037908	65.42088097	69.40026321	281.112877	C13H16N2O5	L-Aspartyl-L-phenylalanine
382	PP_0037887	115.9141498	10.35154559	184.0945388	C9H13NO3	Adrenaline
383	PN_0016736	126.0793077	0.445356457	437.1619839	C25H26O7	Methyl 2-[4-hydroxy-3-(3-methyl-2-buten-1-yl)benzyl]-3-(4-hydroxyphenyl)-4-methoxy-5-oxo-2,5-dihydro-2-furancarboxylate
384	PN_0017301	163.8962981	19.56818374	209.0662378	C6H12O5	D-Fucose
385	PP_0036004	106.0056602	111.3499215	106.0864484	C4H11NO2	Diethanolamine | 3-Methylamino-1,2-propanediol | 2-Amino-2-methylpropane-1,3-diol
386	PP_0028304	126.0842751	0.961588335	269.0622299	C8H16N2O4S2	Homocystine
387	PP_0012342	81.96868655	17.52325986	131.117926	C6H14N2O	N-Acetylputrescine
388	PN_0012599	108.6335419	18.50045048	131.0343609	C5H8O4	Glutaric acid
389	PN_0016117	51.59701272	10.03896788	167.0203389	C5H4N4O3	Uric acid
390	PP_0046237	91.18335848	0.450946715	301.2155592	C20H30O3	18,19-Dihydroxytrachyloban-2-one
391	PN_0010776	73.33636408	8.117504787	191.0192413	C6H8O7	Citric acid
392	PP_0015974	55.18341667	0.243613339	289.0671214	C15H12O6	Maesopsin
393	PN_0011380	109.1407414	21.50136218	133.0134601	C4H6O5	L-Malic acid
394	PN_0017114	49.80037717	57.77777621	201.0875128	C8H14N2O4	L-Seryl-L-proline
395	PN_0013752	13.61721257	5.887752843	401.0869947	C20H18O9	Versiconol acetate
396	PP_0028783	41.13832244	24.26574702	244.1654676	C11H21N3O3	L-Lysyl-L-proline
397	PP_0027361	87.14743221	0.526260474	136.0756659	C8H9NO	2-Phenylacetamide
398	PP_0024212	46.35737682	10.95178093	132.1018639	C6H13NO2	L-Isoleucine
399	PP_0006398	123.6045923	75.13898036	267.1224337	C12H20O5	4-Oxododecanedioic acid
400	PP_0043815	21.93422773	0.237538425	330.0596937	C10H12N5O6P	Adenosine 3prime,5prime-cyclic phosphate
401	PP_0041523	57.17043126	18.56289093	206.0810811	C11H11NO3	Indole-3-lactic acid
402	PP_0022026	130.2671025	16.90038378	104.0708407	C4H9NO2	(R)-2-Aminobutanoic acid
403	PN_0004192	50.83076276	8.790940282	209.0452169	C10H10O5	(3R,4R)-4,7-Dihydroxymellein
404	PN_0020137	70.28428671	33.80943296	347.0389982	C10H13N4O8P	Inosine 5prime-monophosphate
405	PN_0004474	65.33910534	47.26121441	189.0873623	C7H14N2O4	2,6-Diaminopimelic acid
406	PP_0046084	49.99243826	19.25920319	209.0919214	C10H12N2O3	L-kynurenine
407	PN_0000916	115.5808231	9.559124037	609.1461902	C27H30O16	Kaempferol 3-O-gentiobioside
408	PN_0020919	139.2128793	0.506951706	507.2227698	C25H34O8	(2R,3R,4S,5S,6R)-2-[1,7-Bis(4-hydroxyphenyl)heptan-3-yloxy]-6-(hydroxymethyl)oxane-3,4,5-triol
409	PN_0023702	84.93868002	0.776751904	533.2816807	C29H42O9	9-Hydroxy-9-[[(E)-2-(hydroxymethyl)-3-[3-(hydroxymethyl)-6-propan-2-ylcyclohex-2-en-1-yl]prop-2-enoyl]oxymethyl]-1-oxo-6-propan-2-yl-3,5a,6,7,8,9a-hexahydro-2-benzoxepine-4-carboxylic acid
410	PP_0003340	45.79243325	0.186576571	489.355937	C30H48O5	(2alpha,3alpha,5xi,9xi,18xi,19xi,20xi)-2,3,23-Trihydroxyurs-12-en-28-oic acid
411	PP_0042479	161.6568884	33.15209539	247.1283381	C10H18N2O5	L-Valyl-L-glutamic acid
412	PP_0018773	116.0496762	0.316293097	263.1387694	C14H18N2O3	L-Prolyl-L-phenylalanine
413	PP_0041637	55.95678175	34.07324632	293.2106457	C18H28O3	4-Hydroxy-6-[2-(2-methyl-1,2,4a,5,6,7,8,8a-octahydronaphthalen-1-yl)ethyl]oxan-2-one
414	PN_0018660	65.69030824	0.609659675	329.0631208	C17H14O7	Cirsiliol
415	PN_0005137	90.99779835	2.013547403	175.0242499	C6H8O6	Ascorbate
416	PP_0023371	68.75383121	17.53945437	219.1336274	C9H18N2O4	L-Valyl-L-threonine
417	PP_0029876	34.0555589	0.206740763	336.1349852	C16H21N3O3S	L-Tryptophyl-L-methionine
418	PP_0022025	52.96557542	8.284621778	156.0767201	C6H9N3O2	L-Histidine
419	PN_0001606	55.68964968	0.340933568	461.0726262	C21H18O12	(2S,3S,4S,5R,6S)-6-[5,7-Dihydroxy-2-(4-hydroxyphenyl)-4-oxochromen-3-yl]oxy-3,4,5-trihydroxyoxane-2-carboxylic acid
420	PN_0024259	58.79464105	9.660700168	131.0454192	C4H8N2O3	L-Asparagine
421	PP_0018762	99.8774758	3.187933871	167.0562772	C6H6N4O2	3-Methylxanthine | 7-Methylxanthine
422	PP_0007891	48.57833633	3.891022547	171.0055094	C3H7O6P	Glyceraldehyde 3-phosphate
423	PN_0015098	9.354364213	12.04762414	473.0764292	C22H18O12	Chicoric acid
424	PP_0025187	65.27833998	29.06586475	464.217493	C26H29N3O5	3-Hydroxy-9,9,16,16-tetramethyl-8-oxa-14,23,25-triazaheptacyclo[17.5.2.0~1,17~.0~3,15~.0~4,13~.0~7,12~.0~19,23~]hexacosa-4,6,10,12,14-pentaene-24,26-dione 14-oxide
425	PP_0024214	143.4739697	3.005022828	154.0973472	C7H11N3O	N-omega-Acetylhistamine
426	PN_0013797	50.72380164	0.22099512	268.1040989	C10H15N5O4	L-Histidyl-L-asparagine
427	PN_0024056	32.97397866	0.122407331	445.0792573	C21H18O11	Genistein 4prime-glucuronide
428	PP_0043317	84.62328811	12.01709339	118.0612278	C3H7N3O2	Glycocyamine
429	PN_0015427	57.36333277	0.372008079	445.0775019	C21H18O11	Apigenin 7-glucuronide
430	PP_0003004	42.61493414	0.316012889	425.1932608	C25H28O6	Kushenol E | Orientanol E
431	PP_0012660	103.9400387	11.85220409	336.3256512	C22H41NO	Pipericine
432	PN_0010884	71.36048144	38.72012334	187.1334855	C10H20O3	beta-Hydroxycapric acid
433	PP_0042558	86.24046168	17.05903874	337.1042149	C20H16O5	Psoralidin | Alpinumisoflavone
434	PP_0005381	88.76055212	13.64558934	162.0760299	C6H11NO4	O-Acetyl-L-homoserine | N-Methyl-L-glutamic acid
435	PP_0016239	90.20272959	0.969061251	401.2316873	C24H32O5	10-Hydroxy-9-isopropyl-1,6-dimethyl-5,12-dioxatricyclo[9.1.0.0^(4,6)]dodec-8-yl (2E)-3-phenylacrylate
436	PP_0025150	50.43290764	0.398477705	145.0493694	C6H8O4	5-(Hydroxymethyl)-4-methoxy-2(5H)-furanone | 5-Hydroxy-4-methoxy-5,6-dihydro-2H-pyran-2-one
437	PN_0013402	201.0172317	1.002223059	343.1234539	C12H24O11	Lactitol | Maltitol
438	PP_0016275	50.68163638	0.481405941	145.049361	C6H8O4	5-Hydroxy-4-methoxy-5,6-dihydro-2H-pyran-2-one
439	PN_0021887	116.1359593	0.271624663	165.0549929	C9H10O3	Tropic acid
440	PP_0005363	189.4643602	7.815472431	247.139754	C9H18N4O4	D-Octopine
441	PP_0016914	85.73926243	17.77709612	130.0862513	C6H11NO2	Cycloleucine | L-Pipecolic acid
442	PN_0010848	143.6366844	32.23714805	147.0293468	C5H8O5	D-Citramalic acid
443	PN_0020492	144.3428982	0.855959774	149.0083156	C4H6O6	L-Tartaric acid
444	PN_0012980	41.55304154	4.201161394	215.1648114	C12H24O3	(3R)-3-Hydroxydodecanoic acid
445	PP_0041478	84.06068881	12.84445901	132.0767111	C4H9N3O2	Creatine
446	PN_0002565	68.09234735	0.208422372	813.464295	C41H68O13	(3R,5aR,5bR,11aR,13bR)-4-Hydroxy-5a,5b,8,8,11a,13b-hexamethyl-3-[2-[3,4,5-trihydroxy-6-(hydroxymethyl)oxan-2-yl]oxypropan-2-yl]-9-(3,4,5-trihydroxyoxan-2-yl)oxy-2,3,3a,4,5,6,7a,9,10,11,11b,12,13,13a-tetradecahydro-1H-cyclopenta[a]chrysen-7-one
447	PP_0012426	63.57410292	28.98759502	520.3394248	C26H50NO7P	2-Linoleoyl-sn-glycero-3-phosphocholine | [2-Hydroxy-3-[(9Z,12Z)-octadeca-9,12-dienoyl]oxypropyl] 2-(trimethylazaniumyl)ethyl phosphate
448	PN_0003745	76.042389	13.48621737	251.1286299	C16H22O5	Methyl 3-[(3aS,8R,8aR)-8-hydroxy-6,8-dimethyl-3-methylene-2-oxo-3,3a,4,5,8,8a-hexahydro-2H-cyclohepta[b]furan-7-yl]propanoate
449	PP_0043331	61.38779068	4.82906593	306.0492351	C9H12N3O7P	2prime,3prime-cyclic Cytidine monophosphate
450	PP_0036628	57.66332154	10.12226797	297.1077367	C13H16N2O6	L-Aspartyl-L-tyrosine
451	PP_0029869	48.94721138	5.214642871	329.1379751	C19H22O6	13,17-Dihydroxy-4-methyl-14-methylene-5-oxo-6-oxapentacyclo[11.2.1.1~4,7~.0~1,10~.0~3,9~]heptadec-8-ene-2-carboxylic acid
452	PN_0013781	27.01727082	2.654870164	405.1917445	C21H28O5	(8xi,9xi,14xi)-17,21-Dihydroxypregn-4-ene-3,11,20-trione
453	PP_0010849	73.15952912	0.306561317	143.0338469	C6H6O4	Kojic acid
454	PN_0016369	104.6113219	48.50205447	285.2070954	C16H30O4	Hexadecanedioic acid
455	PN_0000260	49.03716739	0.182743307	505.2127145	C25H32O8	Clausenolide
456	PP_0022530	58.29094481	14.4514158	249.148129	C15H20O3	(1aR,5aS,9aS)-1a,4-Dimethyl-8-methyleneoctahydro-1aH-oxireno[3,3a]azuleno[6,5-b]furan-7(8H)-one | Glechomafuran | (3aR,5aR,9bR)-3a-Hydroxy-5a,9-dimethyl-3-methylidene-4,5,6,7,8,9b-hexahydrobenzo[g][1]benzofuran-2-one
457	PP_0044123	36.54166412	0.141202195	244.1655734	C11H21N3O3	L-Prolyl-L-lysine
458	PN_0024710	36.33572378	0.210275479	395.2798983	C23H40O5	Radiclonic acid
459	PP_0004874	60.40205395	7.052744883	162.1123054	C7H15NO3	L-Carnitine
460	PP_0037913	33.42108732	12.08175417	221.1144165	C8H16N2O5	L-Threonyl-L-threonine
461	PP_0043825	311.8351988	1.333896657	279.1695336	C15H22N2O3	L-Isoleucyl-L-phenylalanine
462	PN_0015490	73.66267857	22.59555141	333.2070294	C20H30O4	1,10a-Dihydroxy-4,4,7,11b-tetramethyl-2,3,4,4a,5,6,6a,7,10a,11,11a,11b-dodecahydrophenanthro[3,2-b]furan-9(1H)-one
463	PP_0003828	106.2262727	50.3073327	587.2809595	C33H38N4O6	Irinotecan
464	PP_0035911	52.49811878	21.86086166	232.1290844	C9H17N3O4	L-Asparaginyl-L-valine
465	PP_0022641	51.77567923	0.206513421	132.0807162	C9H9N	3-Methylindole
466	PN_0018788	85.38408138	0.466552722	447.0930078	C21H20O11	Luteolin-4prime-glucoside
467	PN_0014260	285.3619934	1.943579059	399.0127836	C4H9O7P	Erythrose 4-phosphate
468	PN_0011929	48.30758484	15.2216999	160.0608305	C5H9NO2	L-Proline
469	PP_0043334	199.4894455	6.787518341	377.1451415	C17H20N4O6	Riboflavin
470	PP_0001037	45.89724339	29.49184143	369.1119864	C15H22O9	Aucubin
471	PP_0035926	156.3668448	41.23500984	288.2165536	C15H29NO4	L-Octanoylcarnitine
472	PN_0018532	48.24703713	22.70534839	115.0398137	C5H8O3	alpha-Ketoisovaleric acid
473	PP_0007905	464.147678	10.47124605	139.0501052	C6H6N2O2	Urocanic acid
474	PP_0043286	88.17518413	0.20393371	461.1073906	C22H20O11	Oroxindin
475	PP_0017820	15.45959158	0.143325891	297.1264933	C14H20N2O3S	L-Phenylalanyl-L-methionine
476	PN_0021720	78.61313134	46.03984446	213.1492921	C12H22O3	(5Z)-3-Hydroxy-5-dodecenoic acid
477	PP_0037873	121.9361342	6.599027333	112.0394624	C5H5NO2	2,5-Dihydroxypyridine
478	PP_0018800	61.14149667	0.390454949	515.2320707	C28H34O9	Schisantherin B
479	LP_0000645	103.7795662	22.97587193	150.1126	C6H15NO3	Triethanolamine
480	LP_0003622	38.624064	15.79948826	806.5691	C46H80O8N1P1	PC 38:6
481	LP_0005353	103.5938122	82.74321712	641.5112	C39H70O5	DAG 36:3
482	LP_0003627	83.66015801	34.77668635	804.5529	C46H78O8N1P1	PC 38:7
483	LP_0001612	28.68075338	40.95652572	691.5377	C37H72O7NP1	MePC 38:2e
484	LN_0003693	159.7413705	60.36236344	185.0422	C4H8O3	2-Hydroxybutyric acid
485	LN_0003404	63.74168061	29.62687457	303.2331	C20H32O2	Arachidonic acid
486	LP_0005809	20.75851034	0.295694039	844.6862	C48H93NO10	GlcCer t42:1O
487	LN_0001376	63.00151773	34.37383225	748.5285	C43H76O7N1P1	PE 38:6e
488	LP_0001263	53.74966196	0.401495383	708.7217	C46H93O3N1	Cer d46:0
489	LP_0004622	134.0695909	1.804566004	147.0917	C9H10N2	5,6-Dimethylbenzimidazole
490	LN_0000203	61.00462375	0.434228154	249.1496	C15H22O3	(2E)-6-(1-Hydroxy-4-methylcyclohex-3-en-1-yl)-2-methylhepta-2,6-dienoic acid
491	LP_0007507	166.1219442	129.612245	818.7225	C51H92O6	TAG 48:3
492	LP_0008644	191.6859686	193.8296524	906.848	C57H108O6	TAG 54:1
493	LN_0006067	64.11467627	17.47955616	909.5496	C49H83O13N0P1	PI 40:6
494	LP_0001333	66.41266201	31.93536224	550.3868	C28H56O7N1P1	LysoPC 20:1
495	LP_0002446	45.58352396	9.753242812	182.0814	C9H11NO3	Tyrosine | 3-Amino-3-(4-hydroxyphenyl)propanoic acid
496	LP_0005663	47.87545281	23.02755147	768.5533	C43H78O8N1P1	PE 38:4
497	LN_0001344	82.79050851	0.631761987	151.06	C5H12O5	Xylitol | Adonitol | L-(-)-Arabitol
498	LP_0003605	44.80697362	17.42241214	808.5831	C46H82O8N1P1	PC 38:5
499	LP_0003221	80.55113836	13.59651997	572.3346	C29H50O8N1P1	PC 21:4
500	LN_0003175	61.18824813	37.50222061	792.5549	C45H80O8N1P1	PE 40:5
501	LP_0004605	57.97647891	0.19085118	409.1304	C23H22O8	Villosinol
502	LN_0005688	39.0841794	0.182213873	561.4889	C36H66O4	OAHFA 36:2
503	LN_0003897	50.76758405	0.216756403	455.3535	C30H48O3	B-Boswellic acid
504	LP_0002793	83.08347576	125.4111901	936.8938	C59H114O6	TAG 56:0
505	LP_0007362	81.86056694	45.69190737	974.8159	C63H104O6	TAG 60:9
506	LN_0001986	35.68139381	0.157455034	514.2845	C26H45NO7S	Taurocholic acid
507	LN_0004733	61.30302842	30.80289727	772.5288	C45H76O7N1P1	PE 40:8e
508	LN_0004553	23.62658746	0.324601164	241.217	C15H30O2	Pentadecanoic acid (15:0)
509	LP_0002286	80.15657532	47.82000405	950.8161	C61H104O6	TAG 58:7
510	LP_0007560	62.98130121	1.061799688	1018.9721	C65H124O6	TAG 62:1
511	LP_0006026	42.53690683	13.68366664	972.7336	C54H101O13N1	Hex2Cer d42:2
512	LP_0007228	166.1246917	37.6511551	712.6436	C43H82O6	TAG 40:0
513	LP_0003566	48.58198224	23.52659459	814.6312	C46H88NO8P	PC 38:2
514	LP_0005925	87.83333645	0.407836893	122.0967	C8H11N	Phenethylamine
515	LP_0008670	26.74460215	32.05808846	536.5038	C34H67O4N1	Cer t34:1
516	LP_0001281	64.49940309	37.13061777	898.785	C57H100O6	TAG 54:5
517	LP_0007491	75.08171029	11.9157345	978.8452	C63H108O6	TAG 60:7
518	LP_0008588	113.5161395	1.312211305	866.7221	C55H92O6	TAG 52:7
519	LP_0008008	27.74195632	35.91115574	834.5914	C44H83O13N1	Hex2Cer d32:1
520	LP_0001291	237.5623049	4.289446312	365.1051	C12H22O11	D-Gentiobiose
521	LP_0001313	41.89218441	14.79245063	508.3763	C26H54O6N1P1	LysoPC 18:1e
522	LP_0006568	38.83676614	14.76818801	811.668	C47H91O6N2P1	SM d42:3
523	LP_0005573	34.69088953	30.01622972	872.7088	C50H98NO8P	PC 42:1
524	LP_0001140	78.54520534	33.31196477	652.6602	C42H85O3N1	Cer d42:0
525	LP_0005570			830.5686	C48H80O8N1P1	PC 40:8
526	LP_0005638	52.9753254	30.48439193	724.5269	C41H74O7N1P1	PE 36:4p | PE 36:5e
527	LP_0004514	65.95827553	0.848668184	206.0458	C10H7NO4	Xanthurenic acid
528	LP_0005642	30.91937479	0.238695838	738.5063	C41H72NO8P	PE 36:5
529	LP_0006210	50.52992157	17.68880371	902.5743	C47H81O13N0P1	PI 38:5
530	LP_0007209	19.82485377	0.691120738	572.4874	C33H62O6	TAG 30:0
531	LP_0003384	49.82543268	22.63746631	774.5999	C43H84O8N1P1	PC 35:1
532	LN_0004674	124.481249	58.13704714	720.4973	C41H72O7N1P1	PE 36:6e
533	LP_0004871	47.72305646	29.38434091	312.2168	C17H29O4N1	AcCa 10:2
534	LP_0004869	96.23594653	34.93728	314.2325	C17H31O4N1	AcCa 10:1
535	LN_0001394	62.4533872	25.22873234	746.5132	C43H74O7N1P1	PE 38:7e
536	LP_0001324	49.40854761	23.35260181	520.3399	C26H50O7N1P1	LysoPC 18:2
537	LP_0007333	164.688145	180.907581	736.644	C45H82O6	TAG 42:2
538	LP_0000921	55.3601517	25.36431353	130.0864	C6H11NO2	Cycloleucine | Pipecolic acid
539	LN_0004611	43.4291322	20.76008092	452.2784	C21H44NO7P	LysoPE 16:0
540	LN_0000195	54.69000072	33.16490783	704.62	C43H81O3N1	Cer d43:3
541	LP_0001393	83.52491871	271.9770502	948.894	C60H114O6	TAG 57:1
542	LP_0001105	132.5809487	200.1140725	885.7875	C57H104O6	TAG 54:3
543	LP_0005690	63.2353235	33.16984073	764.5217	C43H74O8N1P1	PE 38:6
544	LP_0003439	46.62273488	16.76187368	766.5739	C44H80O7N1P1	PC 36:4e | PC 36:5e
545	LN_0004254	49.03385682	5.972175916	138.0187	C6H5NO3	6-Hydroxynicotinic acid
546	LN_0002918	70.92599981	39.26174448	773.5337	C42H79O10P	PG 36:2
547	LP_0005710	55.64664359	14.88797259	778.5738	C45H80O7N1P1	PE 40:5p
548	LP_0001594	51.60859045	19.74493791	790.5728	C44H82O7N1P1	MePC 35:4e
549	LP_0007392	65.12095614	29.69928513	648.6285	C42H81O3N1	Cer d42:2
550	LN_0002184	66.96792956	32.77020438	281.2487	C18H34O2	Elaidic acid | (E)-Octadec-11-enoic acid | Oleic acid | Petroselinic acid
551	LP_0005651	47.43649807	18.1141618	756.5894	C43H82O7N1P1	PE 38:2p
552	LP_0005557	43.00967121	20.67834815	834.5996	C48H84O8N1P1	PC 40:6
553	LP_0004806	39.23258671	4.280247053	297.1464	C19H22O4	7-[(2E,5E)-7-Hydroxy-3,7-dimethylocta-2,5-dienoxy]chromen-2-one
554	LP_0007367	81.02677823	241.9887911	1002.9408	C64H120O6	TAG 61:2
555	LP_0005674	50.17074617	29.32154571	752.5582	C43H78O7N1P1	PE 38:4p
556	LP_0001237	46.13286316	26.94339218	736.7527	C48H97O3N1	Cer d48:0
557	LN_0003182	52.27311598	21.3934028	776.56	C45H80O7N1P1	PE 40:5p | PE 40:6e
558	LN_0003884	16.253368	0.153958155	215.1647	C12H24O3	3-Hydroxydodecanoic acid 12:0(3-OH)
559	LP_0005699	42.71570344	0.480395633	798.5998	C45H84NO8P	PE 40:3
560	LP_0007619	101.616749	79.27232327	848.7695	C53H98O6	TAG 50:2
561	LP_0003644	50.26717449	19.5917246	838.6316	C48H88O8N1P1	PC 40:4
562	LN_0005661	59.00635979	0.999704505	217.0169	C11H7ClN2O	Streptochlorin
563	LP_0005575	51.92770618	20.21746014	854.5673	C50H80O8N1P1	PC 42:10
564	LP_0008435	91.56220376	32.56795677	980.8618	C63H110O6	TAG 60:6
565	LN_0003089	57.85994794	22.01628371	504.3098	C25H48O7N1P1	LdMePE 18:2
566	LP_0003102	94.25300598	90.51981553	914.8167	C58H104O6	TAG 55:4
567	LP_0001412	42.3691866	17.89112408	502.2928	C25H44O7N1P1	LysoPE 20:4
568	LN_0006065	43.59626519	34.17096351	911.5654	C49H85O13N0P1	PI 40:5
569	LP_0003652	80.85901051	75.23567625	928.832	C59H106O6	TAG 56:4
570	LP_0005307	39.10894966	11.97777151	662.6434	C43H85O4N1	Cer t43:1
571	LN_0005502	63.0016621	28.12210489	267.2331	C17H32O2	Heptadecenoic acid (17:1) | cis-10-Heptadecenoic acid
572	LP_0004323	44.83817763	0.361359857	333.0301	C14H14Cl2O5	3-(3,3-Dichloro-2-hydroxypropyl)-6,8-dimethoxyisochromen-1-one
573	LN_0005287	25.62457623	0.212726505	451.3796	C28H52O4	OAHFA 28:1
574	LP_0003343	109.4610542	66.98733808	944.7691	C61H98O6	TAG 58:10
575	LN_0003858	26.96972465	50.52157386	237.0611	C8H14O8	Ketodeoxyoctonic acid
576	LP_0005803	95.83568458	64.97536402	926.8164	C59H104O6	TAG 56:5
577	LN_0004623	17.56872846	0.278005905	619.2884	C29H49O12N0P1	LysoPI 20:4 (20:4)
578	LP_0006197	39.89420034	12.29181782	904.5896	C47H83O13N0P1	PI 38:4
579	LN_0002543	58.38979545	86.69367332	807.503	C41H77O13N0P1	PI 32:1
580	LP_0008664	97.94635005	49.69184098	918.7533	C59H96O6	TAG 56:9
581	LN_0003180	56.58468686	99.32879287	794.5703	C45H82O8N1P1	PE 40:4
582	LN_0005322	43.39483541	58.00478044	295.2643	C19H36O2	Nonadecenoic acid (19:1)
583	LP_0003435	60.79178852	25.64572178	782.5689	C44H80O8N1P1	PC 36:4
584	LN_0005345	67.13356159	0.160250317	255.0664	C15H12O4	Pinocembrin | Liquiritigenin
585	LP_0005602	40.43455383	18.13640283	730.5365	C40H76NO8P	PE 35:2
586	LP_0008517	144.9540209	137.0189284	878.8167	C55H104O6	TAG 52:1
587	LP_0003241	45.40108342	14.06778816	718.5734	C40H80O7N1P1	PC 32:1e
588	LP_0002882	49.72896696	0.523593865	1008.8938	C65H114O6	TAG 62:6
589	LP_0007498	146.1999422	118.7663124	820.738	C51H94O6	TAG 48:2
590	LP_0004862	126.1953954	45.69622616	316.2482	C17H33O4N1	AcCa 10:0
591	LP_0003370	69.32691065	30.88629988	754.5374	C42H76O8N1P1	PC 34:4
592	LP_0008481	97.63850138	64.43345986	860.7694	C54H98O6	TAG 51:3
593	LP_0006570	61.55233391	23.6576689	809.6521	C47H89O6N2P1	SM d42:4
594	LN_0002049	54.26636269	0.815973844	764.5226	C43H76NO8P	PE 38:5
595	LN_0006231	80.99076932	47.57575986	716.5237	C39H76O8N1P1	PE 34:1
596	LP_0004990	117.2020177	2.313295328	138.0549	C7H7NO2	Anthranilic acid | N-Methylnicotinic acid | 4-Aminobenzoic acid
597	LN_0003560	71.1609252	35.87100152	307.2645	C20H36O2	FA 20:2
598	LP_0008513	188.9932748	136.0115838	880.8325	C55H106O6	TAG 52:0
599	LP_0002347	120.5945014	93.43982188	970.8787	C62H112O6	TAG 59:4
600	LP_0001274	47.85257285	14.73245886	510.3919	C26H56O6N1P1	LysoPC 18:0e
601	LP_0003382	39.40139866	11.73469407	772.5839	C43H82O8N1P1	PC 35:2
602	LN_0004622	23.61892014	0.730791841	526.294	C27H46O7N1P1	LysoPE 22:5 (22:5)
603	LP_0003645	78.48882744	192.4604986	844.6782	C48H94NO8P	PC 40:1
604	LP_0007366	29.40881437	0.123141089	1004.9568	C64H122O6	TAG 61:1
605	LP_0005961	30.92153098	26.8167504	974.749	C54H103O13N1	Hex2Cer d42:1
606	LP_0001389	42.64416483	18.05959885	482.3241	C23H48O7N1P1	LysoPE 18:0
607	LN_0004618	26.8198947	73.25647887	502.2942	C25H46O7N1P1	LysoPE 20:3 (20:3)
608	LP_0007398	60.42026233	39.71176034	754.6903	C46H88O6	TAG 43:0
609	LP_0001192	37.96892825	13.55648165	496.3398	C24H50NO7P	LysoPC 16:0
610	LP_0004876	44.7749052	64.92870162	308.1833	C17H25O4N1	AcCa 10:4
611	LP_0001416	208.4721289	238.0316186	932.8631	C59H110O6	TAG 56:2
612	LP_0008590	105.5217889	177.4694508	920.7725	C59H98O6	TAG 56:8
613	LP_0005874	36.71584413	8.88394749	698.5564	C40H77O9N1	Hex1Cer t34:1
614	LP_0003353	158.4816399	154.487905	962.9096	C61H116O6	TAG 58:1
615	LP_0003672	48.06104645	17.53313719	822.6362	C48H88O7N1P1	PC 40:5e
616	LP_0004119	50.12392123	29.52485132	356.279	C20H34O4	2-(2-Hydroxy-3-buten-2-yl)-3a,6,6,9a-tetramethyldodecahydronaphtho[2,1-b]furan-4,5-diol
617	LN_0005825	69.85063187	33.15292405	279.233	C18H32O2	Octadeca-5,6-dienoic acid | Linoleic acid (FA 18:2)
618	LN_0002476	72.19937559	28.3037163	301.2174	C20H30O2	Auricularic acid | Abietic acid | Isopimaric acid | FA 20:5 | (1R,4aR,10aR)-1,4a-Dimethyl-7-propan-2-yl-2,3,4,4b,5,6,10,10a-octahydrophenanthrene-1-carboxylic acid | Isopimaric acid A | (1S,4aR,10aR)-7-Ethenyl-1,4a,7-trimethyl-3,4,4b,5,6,9,10,10a-octahydro-2H-phenanthrene-1-carboxylic acid
619	LP_0007285	78.1061329	0.639406451	166.1227	C10H15NO	Hordenine
620	LN_0002007	88.5758253	0.308604752	313.036	C16H10O7	5,7-Dihydroxy-4-methoxy-9,10-dioxo-9,10-dihydro-2-anthracenecarboxylic acid
621	LP_0005460	90.18183353	0.725161308	228.2685	C15H34N+	Dodecyltrimethylammonium
622	LP_0003386	47.42983611	10.25747991	770.5687	C43H80NO8P	PC 35:3
623	LP_0002822	74.6247847	31.11745052	1040.9568	C67H122O6	TAG 64:4
624	LP_0003229	39.49316508	11.94853969	734.5689	C40H80O8N1P1	PC 32:0
625	LP_0002185	71.53357958	39.6465058	912.7983	C58H102O6	TAG 55:5
626	LP_0007410	250.6319245	180.1435455	766.691	C47H88O6	TAG 44:1
627	LP_0001536	87.55474592	23.53621073	717.5537	C39H74O7NP1	MePC 30:2e
628	LP_0001339	68.45932544	24.27005243	546.3552	C28H52O7N1P1	LysoPC 20:3
629	LP_0001239	142.9566092	184.1500136	1042.9724	C67H124O6	TAG 64:3
630	LN_0004725	134.6645092	47.28278702	181.9909	C7H5NO3S	Saccharin
631	LP_0002880	60.39722002	0.323938806	1030.9724	C66H124O6	TAG 63:2
632	LP_0005244	35.01182945	0.230653024	596.5967	C38H77O3N1	Cer d38:0
633	LP_0005593	54.62082183	28.30723429	700.5269	C39H74O7N1P1	PE 34:2p | PE 34:3e
634	LN_0002868	82.62996931	90.77696196	223.17	C14H24O2	Tetradec-5-ynoic acid
635	LP_0005582	47.36911092	7.128095251	690.5065	C37H72NO8P	PE 32:1
636	LP_0001396	30.33884447	63.20622414	950.9096	C60H116O6	TAG 57:0
637	LP_0001399	118.7239826	208.9856883	946.8787	C60H112O6	TAG 57:2
638	LN_0003576	280.1337615	115.9157688	337.3114	C22H42O2	Erucic acid (FA 22:1)
639	LP_0006503	36.3983465	47.48637248	719.5688	C39H79O7N2P1	SM t34:1
640	LP_0005620	50.58702516	30.24241022	744.5532	C41H78NO8P	PE 36:2
641	LP_0003342	218.3460471	241.4541556	960.8942	C61H114O6	TAG 58:2
642	LP_0005725	40.35849102	93.25395017	922.8785	C58H112O6	TAG 55:0
643	LP_0005595	58.19697634	32.890159	716.5216	C39H74O8N1P1	PE 34:2
644	LN_0002051	65.24048675	141.2101275	764.5236	C43H76O8N1P1	PE 38:5
645	LN_0005256	86.08254198	9.659168845	153.0184	C7H6O4	Gentisic acid | 2,3-Dihydroxybenzoic acid | 3,4-Dihydroxybenzoic acid
646	LP_0008445	129.1371941	183.1711896	842.7224	C53H92O6	TAG 50:5
647	LP_0007443	223.8059075	142.9291346	796.7382	C49H94O6	TAG 46:0
648	LP_0007481	194.4983248	143.0984438	824.7695	C51H98O6	TAG 48:0
649	LP_0000672	51.35448324	0.502862541	682.6335	C42H83NO5	Cer t42:1O
650	LP_0002351	74.11805961	253.6943291	968.8627	C62H110O6	TAG 59:5
651	LP_0003625	52.75871546	21.66578665	792.589	C46H82O7N1P1	PC 38:6e
652	LP_0002883	59.57131556	0.197078764	1032.9877	C66H126O6	TAG 63:1
653	LN_0000920	52.67437838	26.18109935	680.6199	C41H81O3N1	Cer d41:1
654	LP_0006090	46.00201521	14.14583889	880.5897	C45H83O13N0P1	PI 36:2
655	LP_0003223	71.99814945	34.61109917	706.5372	C38H76O8N1P1	PC 30:0
656	LP_0006536	77.60727902	28.05416481	751.5715	C43H79O6N2P1	SM d38:5
657	LP_0007446	239.9526646	147.8222751	792.7069	C49H90O6	TAG 46:2
658	LP_0003268	52.08627332	13.9100056	748.6209	C42H86O7N1P1	PC 34:0e
659	LP_0007547	193.9614625	150.9603421	852.8012	C53H102O6	TAG 50:0
660	LN_0002317	43.78757129	55.22117157	395.3893	C26H52O2	Hexacosanoic acid (26:0)
661	LP_0002826	66.40025117	0.636725576	1056.9881	C68H126O6	TAG 65:3
662	LN_0002256	43.48931863	10.17714186	744.5542	C41H80O8N1P1	dMePE 34:1
663	LP_0007495	183.9196984	158.4406643	822.7535	C51H96O6	TAG 48:1
664	LN_0001591	57.043176	0.29884081	299.02	C15H8O7	4,5,7-Trihydroxy-9,10-dioxoanthracene-2-carboxylic acid
665	LP_0008584	105.803951	68.08981541	868.738	C55H94O6	TAG 52:6
666	LP_0005607	86.27989532	34.13296201	728.5195	C40H74NO8P	PE 35:3
667	LN_0002542	67.22862081	25.31559426	835.5342	C43H81O13N0P1	PI 34:1
668	LP_0003427	34.76170495	63.94483031	784.5848	C44H82O8N1P1	PC 36:3
669	LP_0005604	45.05779178	0.166952125	732.5532	C40H78NO8P	PE 35:1
670	LP_0002226	51.95833109	25.74525024	900.8005	C57H102O6	TAG 54:4
671	LP_0008484	103.1641242	58.33897613	858.7539	C54H96O6	TAG 51:4
672	LP_0006098	56.73451042	24.64812956	878.574	C45H81O13N0P1	PI 36:3
673	LP_0005708	50.62556503	11.10545748	794.5659	C45H80NO8P	PE 40:5
674	LP_0007461	115.9370216	49.29420038	808.7378	C50H94O6	TAG 47:1
675	LP_0007459	270.540034	168.3369401	790.6911	C49H88O6	TAG 46:3
676	LP_0005759	93.1646242	74.1635865	952.8323	C61H106O6	TAG 58:6
677	LP_0006567	51.73707207	17.49983416	815.6994	C47H95O6N2P1	SM d42:1
678	LP_0006537	42.52653321	13.7516631	787.6682	C45H91O6N2P1	SM d40:1
679	LP_0003525	135.690757	39.04124592	780.5529	C44H78O8N1P1	PC 36:5
680	LP_0003237	79.717532	39.38777046	732.5531	C40H78O8N1P1	PC 32:1
681	LP_0003619	57.87607994	0.881338487	806.5681	C46H80NO8P	PC 38:6
682	LP_0006493	64.28468368	20.53845037	675.5432	C37H75O6N2P1	SM d32:1
683	LP_0001430	122.244654	150.1565865	930.8473	C59H108O6	TAG 56:3
684	LN_0001422	145.5071642	1.831919194	407.2802	C24H40O5	Cholic acid
685	LP_0005552	92.77607102	97.48277038	942.8479	C60H108O6	TAG 57:4
686	LP_0006521	71.37148476	13.8842115	725.5587	C41H77O6N2P1	SM d36:4
687	LP_0005596	55.00561772	69.2898707	714.5064	C39H72NO8P	PE 34:3
688	LP_0004390	73.34216639	0.514848319	286.1777	C18H20O2	3,6-Diphenylcyclohexane-1,2-diol
689	LP_0007503	218.8699448	80.6648278	816.7068	C51H90O6	TAG 48:4
690	LP_0003357	84.30707052	38.03691624	756.5527	C42H78O8N1P1	PC 34:3 | PC 34:3
691	LP_0006512	71.71508411	21.19959309	727.5716	C41H79O6N2P1	SM d36:3
692	LP_0003607	35.25043065	10.61726241	794.6047	C46H84O7N1P1	PC 38:5e
693	LN_0000517	58.11869414	22.19635458	227.2013	C14H28O2	12-Methyltridecanoic acid | Myristic acid
694	LP_0007379	81.32945925	53.57156954	924.8006	C59H102O6	TAG 56:6
695	LP_0001273	41.90730599	16.15439935	524.3712	C26H54O7N1P1	LysoPC 18:0
696	LN_0003954	64.98878469	30.63173639	327.2331	C22H32O2	FA 22:6
697	LP_0006533	60.54421661	25.65758522	753.5871	C43H81O6N2P1	SM d38:4
698	LN_0000022	33.59412734	33.90216091	847.5329	C44H81O13N0P1	PI 35:2
699	LP_0001308	167.2565311	21.86574378	522.3554	C26H52NO7P	LysoPC 18:1
700	LP_0003000	135.499272	261.1495382	974.9096	C62H116O6	TAG 59:2
701	LP_0005272	41.02498314	54.91998112	640.6233	C40H81O4N1	Cer t40:0
702	LP_0000905	54.48521816	18.94564552	666.6174	C45H76O2	ChE 18:2
703	LN_0000991	51.95509711	7.25433327	152.0344	C7H7NO3	3-Hydroxyanthranilic acid
704	LN_0002965	25.95336317	0.193719308	407.1875	C25H28O5	Lochnocarpol A
705	LN_0005673	66.03966759	0.184481458	535.4732	C34H64O4	OAHFA 34:1
706	LN_0003433	24.86904108	20.47774242	171.1018	C9H16O3	(E)-4-Hydroxynon-2-enoic acid
707	LN_0006004	33.56484332	0.157350256	253.0506	C15H10O4	Chrysin | Rubiadin | Daidzein
708	LP_0005566	50.20882288	17.95449849	818.6043	C48H84O7N1P1	PC 40:7e
709	LP_0001369	54.13912963	17.14694429	580.4337	C30H62O7N1P1	LysoPC 22:0
710	LP_0006543	44.80518853	15.36972814	801.6833	C46H93O6N2P1	SM d41:1
711	LP_0006505	95.73780479	29.80987087	697.5249	C39H73O6N2P1	SM d34:4
712	LP_0003633	45.66905399	82.52349569	804.5529	C46H78O8N1P1	PC 38:7 | MePC 35:4
713	LP_0003364	49.74402442	18.46534096	756.5521	C42H78O8N1P1	PC 34:3
714	LP_0007364	92.08419859	276.3050261	1000.9253	C64H118O6	TAG 61:3
715	LN_0002318	35.84133457	115.3866861	251.2015	C16H28O2	Hexadecadienoic acid (16:2)
716	LN_0002158	46.70632881	8.032564763	770.5694	C43H82O8N1P1	dMePE 36:2
717	LN_0002469	39.66941573	51.00355002	871.533	C46H81O13N0P1	PI 37:4
718	LP_0004233	167.1819001	16.41099497	104.1074	C5H13NO	2-Amino-3-methyl-1-butanol
719	LP_0007558	97.7733322	0.252332705	994.8778	C64H112O6	TAG 61:6
720	LP_0005251	26.36737295	0.377480956	592.566	C38H75O4N1	Cer t38:1
721	LP_0003574	48.79396217	21.05270866	812.6158	C46H86O8N1P1	PC 38:3
722	LP_0001253	43.50428318	15.04521435	482.3607	C24H52O6N1P1	LysoPC 16:0e
723	LN_0004614	52.86727097	27.49929683	478.294	C23H46NO7P	LysoPE 18:1
724	LP_0003638	51.66962806	21.10869511	820.5839	C47H82O8N1P1	PC 39:6
725	LP_0001677	45.20015449	0.070125253	516.264	C28H37NO8	(2S)-2-[(2R,2primeR,6primeR,8aprimeS)-4,6prime-Dihydroxy-2prime,5prime,5prime,8aprime-tetramethyl-6-oxo-3prime,4prime,4aprime,5prime,6,6prime,7prime,8,8prime,8aprime-decahydro-2primeH-spiro[furo[2,3-e]isoindole-2,1prime-naphthalen]-7(3H)-yl]pentanedioic acid
726	LP_0001374	56.06945351	23.68148332	570.3555	C30H52O7N1P1	LysoPC 22:5 (22:5)
727	LP_0002845	128.5845637	70.69049164	968.7691	C63H98O6	TAG 60:12
728	LP_0003425	51.89067526	21.54533249	770.6048	C44H84O7N1P1	PC 36:3e
729	LP_0007621	112.7304897	94.01893498	850.7851	C53H100O6	TAG 50:1
730	LP_0005294	51.62036665	21.8405436	668.6547	C42H85O4N1	Cer t42:0
731	LP_0005559	69.42752239	22.17488337	820.6206	C48H86O7N1P1	PC 40:6e
732	LP_0003536	94.48210694	40.18226918	764.559	C44H78O7N1P1	PC 36:6e
733	LP_0001567	52.09846942	12.52304377	794.5675	C43H82O8N1P1	MePC 34:2
734	LP_0000171	109.6287138	0.832169338	478.2799	C26H36O7	(4-Acetyloxy-3,7-dihydroxy-3,7-dimethyl-10-propan-2-yl-11-oxabicyclo[6.2.1]undecan-9-yl) (E)-3-phenylprop-2-enoate
735	LP_0003753	34.54721088	0.290234063	319.2267	C20H32O4	(1R,3R,4R,4aS,8S)-4-[2-(Furan-3-yl)ethyl]-8-(hydroxymethyl)-3,4a,8-trimethyl-2,3,5,6,7,8a-hexahydro-1H-naphthalene-1,4-diol
736	LP_0006690	103.8933385	334.6294894	1016.9563	C65H122O6	TAG 62:2
737	LP_0003233	48.54195023	13.8554648	720.5894	C40H82O7N1P1	PC 32:0e
738	LP_0003561	64.45425831	32.88339295	816.6473	C46H90O8N1P1	PC 38:1
739	LP_0003285	33.2812099	12.438964	760.5849	C42H82O8N1P1	PC 34:1
740	LN_0005582	50.75125647	0.344390648	167.034	C8H8O4	Homogentisic acid | 3,4-Dihydroxyphenylacetic acid
741	LP_0002852	164.1173285	185.1683597	988.9253	C63H118O6	TAG 60:2
742	LP_0005589	44.20964571	20.15654906	702.5428	C39H76O7N1P1	PE 34:1p
743	LP_0001360	83.74092536	35.6806726	542.3242	C28H48O7N1P1	LysoPC 20:5
744	LN_0001602	54.01734069	42.12161445	301.2174	C20H30O2	(5xi,9xi,10xi,13alpha)-Pimara-8(14),15-dien-18-oic acid
745	LP_0005627	58.06818636	29.48151278	742.5367	C41H76O8N1P1	PE 36:3
746	LN_0002280	59.77932845	25.75531934	255.2329	C16H32O2	Palmitic acid
747	LP_0005632	53.97866976	28.10194629	740.522	C41H74O8N1P1	PE 36:4
748	LP_0003543	45.24207094	16.7647349	800.6154	C45H86O8N1P1	PC 37:2
749	LP_0008282	50.03186063	16.19755683	798.681	C47H91O8N1	Hex1Cer d41:1
750	LP_0001186	51.1408967	20.27952962	482.3241	C23H48O7N1P1	LysoPC 15:0
751	LP_0000308	208.14517	7.113148566	268.1056	C10H13N5O4	Adenosine | 2prime-Deoxyguanosine
752	LN_0003926	50.22856741	0.16246017	179.034	C9H8O4	4- Hydroxyphenylpyruvic acid
753	LP_0006685	373.2238368	420.2465106	1014.9409	C65H120O6	TAG 62:3
754	LP_0001337	47.48874849	20.49712032	548.3712	C28H54O7N1P1	LysoPC 20:2
755	LP_0000707	32.87565426	0.189959404	610.5408	C37H68O5	DAG 34:2
756	LP_0005561	51.40428419	23.29162275	832.5839	C48H82O8N1P1	PC 40:7
757	LP_0001190	59.31595186	23.56393898	468.3085	C22H46O7N1P1	LysoPC 14:0
758	LN_0003758	61.2924203	0.513535661	183.0292	C8H8O5	3,4-Dihydroxymandelic acid
759	LP_0003396	33.77520709	9.324503066	786.6005	C44H84O8N1P1	PC 36:2
760	LP_0005546	112.2401825	132.2218253	944.8633	C60H110O6	TAG 57:3
761	LP_0005618	54.22044643	27.89419834	728.5581	C41H78O7N1P1	PE 36:2p
762	LP_0002362	143.5012563	94.4767785	892.7379	C57H94O6	TAG 54:8
763	LP_0003670	52.60699074	18.78225833	824.6517	C48H90O7N1P1	PC 40:4e
764	LP_0008608	89.95600908	69.46844352	888.8007	C56H102O6	TAG 53:3
765	LP_0004867	62.58006368	17.2231568	310.2012	C17H27O4N1	AcCa 10:3
766	LN_0001181	26.58610815	0.155066714	363.0647	C18H17ClO6	5-Chloro-6,8-dihydroxy-3-[(1E,3E)-4-(3-hydroxy-5-methyloxolan-2-yl)buta-1,3-dienyl]isochromen-1-one | 1,4-Anhydro-1-[(1E,3E)-4-(5-chloro-6,8-dihydroxy-1-oxo-1H-isochromen-3-yl)-1,3-butadien-1-yl]-3,5-dideoxypentitol
767	LP_0006527	47.47618053	15.49574021	759.6369	C43H87O6N2P1	SM d38:1
768	LP_0001890	94.28229812	31.30084855	344.2794	C19H37O4N1	AcCa 12:0
769	LP_0005700	61.96269291	12.20398037	796.5807	C45H82NO8P	PE 40:4
770	LN_0005289	114.3541622	12.14541674	439.3793	C27H52O4	OAHFA 27:0
771	LP_0005959	28.93774685	34.00017325	1108.7707	C58H109O18N1	Hex3Cer d40:1
772	LP_0008570	87.62668327	63.46631758	870.7539	C55H96O6	TAG 52:5
773	LP_0000348	51.3909558	27.71325712	646.6129	C42H79O3N1	Cer d42:3
774	LP_0005290	60.79528189	53.99753843	616.5634	C40H75O4N1	Cer t40:3
775	LP_0003534	72.10810639	36.89964127	778.5374	C44H76O8N1P1	PC 36:6
776	LN_0005870	62.71055198	9.694764786	353.3426	C23H46O2	Tricosanoic acid (23:0)
777	LP_0002237	54.02569245	0.189666157	244.0792	C8H15NO6	N-Acetyl-D-mannosamine
778	LP_0007219	68.70569213	14.67236887	682.5968	C41H76O6	TAG 38:1
779	LN_0000353	51.15773992	0.402375912	159.1017	C8H16O3	3-Hydroxyoctanoic acid
780	LP_0000329	55.30065196	19.21731914	634.613	C41H79O3N1	Cer d41:2
781	LP_0001139	53.78781911	22.34854958	650.6441	C42H83O3N1	Cer d42:1
782	LP_0001535	78.49012018	26.95883605	752.5221	C40H76O8N1P1	MePC 31:2
783	LP_0001766	90.41162276	38.92285473	368.2794	C21H37O4N1	AcCa 14:2
784	LP_0003880	109.1929845	0.454114535	417.227	C24H32O6	(4S,4aR,5S,8S)-4-(Isobutyryloxy)-3,4a,5-trimethyl-9-oxo-4,4a,5,6,7,8,8a,9-octahydronaphtho[2,3-b]furan-8-yl 3-methyl-2-butenoate
785	LP_0003351	51.75612988	114.1550097	940.8301	C60H106O6	TAG 57:5
786	LN_0005892	38.74865359	28.42601976	243.062	C9H12N2O6	Uridine
787	LP_0003398	56.02891856	22.712953	772.6209	C44H86O7N1P1	PC 36:2e
788	LP_0006500	31.8114828	8.907173819	703.5746	C39H79O6N2P1	SM d34:1
789	LP_0007221	45.41090251	13.01021249	627.5342	C41H72O5	TAG 38:4e
790	LP_0001035	52.7534795	12.96475889	132.1021	C6H13NO2	L-Leucine | Norleucine | L-Isoleucine | epsilon-Amino-N-caproic acid
791	LP_0003600	36.12574338	12.81471484	810.6	C46H84O8N1P1	PC 38:4 | MePC 35:1
792	LP_0004884	58.62928271	67.7073703	336.2143	C19H29O4N1	AcCa 12:4
793	LP_0007542	31.55021312	0.170710531	828.7065	C52H90O6	TAG 49:5
794	LP_0003352	55.61070729	177.704964	964.9256	C61H118O6	TAG 58:0
795	LP_0003265	41.51853614	12.35242075	762.6001	C42H84O8N1P1	PC 34:0
796	LP_0003333	55.71677824	22.46651744	744.59	C42H82O7N1P1	PC 34:2e
797	LP_0006103	60.00943232	22.45787387	876.5587	C45H79O13N0P1	PI 36:4
798	LP_0001556	112.340171	44.38757222	766.5729	C42H82O7N1P1	MePC 33:2e
799	LN_0000566	38.59984545	0.159449193	469.3324	C30H46O4	(2S,4aS,6aS,6bR,10S,12aS,14bS)-10-Hydroxy-2,4a,6a,6b,9,9,12a-heptamethyl-13-oxo-3,4,5,6,6a,7,8,8a,10,11,12,14b-dodecahydro-1H-picene-2-carboxylic acid
800	LP_0001196	41.27741635	0.25201544	132.0656	C5H9NO3	cis-4-Hydroxy-D-proline | trans-3-Hydroxy-L-proline | trans-4-Hydroxy-L-proline
801	LP_0004652	37.17211806	6.736095955	419.0989	C20H18O10	Kaempferol 3-O-arabinoside
802	LN_0004108	19.90121726	0.12447261	315.2329	C21H32O2	5-[(2Z,8Z)-Pentadeca-2,8-dienyl]benzene-1,3-diol
803	LP_0003556	161.3298582	151.8011429	954.8476	C61H108O6	TAG 58:5
804	LN_0003028	45.83477809	9.216564309	177.0396	C6H10O6	Gluconic acid lactone
805	LP_0005731	65.71086473	38.06931223	792.5525	C45H78O8N1P1	PE 40:6
806	LP_0003245	62.10445682	25.98667723	730.5374	C40H76O8N1P1	PC 32:2
807	LP_0007652	79.29054091	63.11817886	846.7538	C53H96O6	TAG 50:3
808	LN_0004735	73.17356772	40.28992229	788.5239	C45H76O8N1P1	PE 40:7
809	LP_0006531	43.32328899	14.92400114	757.621	C43H85O6N2P1	SM d38:2
810	LN_0002150	42.79978187	15.86359997	772.5852	C43H84O8N1P1	dMePE 36:1
811	LP_0005683	46.54642587	20.49407347	748.5266	C43H76O8N1P1	PE 38:5 | PE 38:6p
812	LN_0006031	45.45251035	17.71322997	752.5599	C43H80O7N1P1	PE 38:3p
813	LP_0006545	49.27061294	17.61324284	799.668	C46H91O6N2P1	SM d41:2
814	LN_0000288	37.97685906	21.79889868	233.1544	C15H22O2	(1Z,5E,9E)-5,8,8-Trimethylcycloundeca-1,5,9-triene-1-carboxylic acid | 8-Isopropyl-5-methyl-3,4,6,7,8,8a-hexahydro-2-naphthalenecarboxylic acid | 2-[(2R,8S,8aR)-8,8a-Dimethyl-1,2,3,5,6,7,8,8a-octahydro-2-naphthalenyl]acrylic acid | Zizanoic acid
815	LN_0001163	26.86336305	21.72320048	166.0501	C8H9NO3	Pyridoxal | 2-Amino-3-methoxybenzoic acid
816	LP_0007536	122.5755256	76.83259493	834.7535	C52H96O6	TAG 49:2
817	LN_0001031	28.64913014	9.192326837	818.5921	C44H86O10N1P1	PS 38:0
818	LP_0000349	52.71842427	12.43404335	664.6598	C43H85O3N1	Cer d43:1
819	LP_0003667	56.96510992	24.27980257	836.6154	C48H86O8N1P1	PC 40:5
820	LP_0003190	63.07243496	19.96728403	870.6938	C50H96NO8P	PC 42:2
821	LP_0005630	51.49815842	26.63843024	726.5425	C41H76O7N1P1	PE 36:3p
822	LP_0003392	45.8052762	21.8968007	788.616	C44H86O8N1P1	PC 36:1
823	LP_0005994	50.20585203	17.68647178	812.6966	C48H93O8N1	Hex1Cer d42:1
824	LN_0000376	95.96232019	138.9684229	225.1856	C14H26O2	(Z)-Tetradec-9-enoic acid
825	LN_0000046	53.91474736	9.661453436	151.0391	C8H8O3	Vanillin | Methylparaben | 2-Hydroxyphenylacetic acid | 3-Hydroxyphenylacetic acid | 4-Hydroxyphenylacetic acid
826	LP_0003911	37.1794225	20.64297417	152.0707	C8H9NO2	(R)-(-)-2-Phenylglycine | 4-(Methylamino)benzoic acid
827	LP_0007555	76.42252035	227.4709714	998.9098	C64H116O6	TAG 61:4
828	LP_0005580	53.77619365	18.29365686	866.6627	C50H92NO8P	PC 42:4
829	LP_0001331	52.56675435	23.18888816	552.4024	C28H58O7N1P1	LysoPC 20:0
830	LP_0006033	51.88525949	20.425663	882.6054	C45H85O13N0P1	PI 36:1
831	LP_0008606	109.4506629	97.28837885	890.8163	C56H104O6	TAG 53:2
832	LP_0003595	56.89123175	18.61843503	810.597	C46H84O8N1P1	PC 38:4
833	LN_0004628	58.11236585	24.73791642	524.2783	C27H44O7N1P1	LysoPE 22:6
834	LN_0000103	97.86740223	44.61110489	309.2801	C20H38O2	Gondoic acid (FA 20:1)
835	LP_0005453	36.98450436	9.463669425	770.5638	C43H80O8N1P1	dMePE 36:3
836	LP_0001407	49.66207806	24.08273743	478.2928	C23H44O7N1P1	LysoPE 18:2
837	LN_0000817	21.8704223	5.289233995	159.0289	C6H8O5	2-Ketoadipate
838	LP_0006319	26.67576306	0.465457714	417.1147	C21H20O9	Puerarin
839	LN_0004068	31.41696347	0.253204417	251.1652	C15H24O3	Sydonol
840	LP_0005395	158.6145547	3.70914413	393.209	C22H29FO5	Dexamethasone
841	LP_0005750	53.33858669	22.68314333	804.5894	C47H82O7N1P1	PE 42:6p
842	LP_0003599	51.05970515	16.45369976	796.6206	C46H86O7N1P1	PC 38:4e
843	LN_0001022	55.24340799	24.0550156	887.5654	C47H85O13N0P1	PI 38:3
844	LP_0001358	50.12637687	20.27220944	544.3396	C28H50O7N1P1	LysoPC 20:4
845	LP_0003547	48.84982365	18.21689175	796.5839	C45H82O8N1P1	PC 37:4
846	LP_0002151	50.7199663	25.59497518	730.5736	C41H80O7N1P1	PE 36:1p
847	LP_0001238	38.56072716	0.32170089	1028.9568	C66H122O6	TAG 63:3
848	LP_0003635	53.01186419	49.17759535	824.6101	C47H86O8N1P1	PC 39:4
849	LP_0005705	51.12818575	22.9649465	780.5894	C45H82O7N1P1	PE 40:4p
850	LP_0007178	115.6571759	52.86227707	922.7875	C59H100O6	TAG 56:7
851	LP_0008528	61.40216108	27.30366815	874.7853	C55H100O6	TAG 52:3
852	LP_0008470	104.5219513	80.95587912	862.7851	C54H100O6	TAG 51:2
853	LN_0003082	47.73775158	13.81712178	480.3096	C23H48O7N1P1	LdMePE 16:0
854	LP_0008594	99.10576051	69.69234495	920.7687	C59H98O6	TAG 56:8
855	LN_0003452	97.05594303	0.575070241	229.0689	C4H8O3	(S)-2-Hydroxybutanoic acid
856	LP_0008600	55.59110966	110.0246805	894.847	C56H108O6	TAG 53:0
857	LP_0003219	72.22830037	13.60889181	548.3346	C27H50O8N1P1	PC 19:2
858	LP_0006642	65.56359728	15.22440873	742.5715	C42H82O8N1P1	PC 34:1
859	LN_0005965	60.20692734	30.70693107	726.5445	C41H78O7N1P1	PE 36:3e
860	LP_0008620	100.2091773	70.19919178	884.769	C56H98O6	TAG 53:5
861	LN_0006032	62.29639304	37.97421399	768.555	C43H80O8N1P1	PE 38:3
862	LP_0005687	53.93297912	31.57137673	750.5431	C43H76O7N1P1	PE 38:5p
863	LP_0007094	30.50421739	1.591164313	315.0838	C17H14O6	Pectolinarigenin
864	LP_0007329	220.9639112	152.6161789	740.6753	C45H86O6	TAG 42:0
865	LN_0003084	50.86237907	16.81180654	508.3407	C25H52O7N1P1	LdMePE 18:0
866	LP_0005654	37.01237906	139.1047119	772.5843	C43H82NO8P	PE 38:2
867	LN_0004665	71.95585639	22.63130029	367.1584	C19H28O5S	Dehydroisoandrosterone-3-sulfate
868	LN_0002381	70.48023632	33.46007755	305.2488	C20H34O2	FA 20:3
869	LP_0001968	89.86236464	56.13554591	972.801	C63H102O6	TAG 60:10
870	LN_0001225	38.95606876	10.89924968	143.0338	C6H8O4	Allymalonic acid | trans-3-Hexenedioic acid
871	LN_0004552	53.95670114	0.506921512	379.3581	C25H48O2	Pentacosenoic acid (25:1)
872	LP_0003247	57.23123578	28.17050888	746.5686	C41H80O8N1P1	PC 33:1
873	LP_0003394	57.32611833	10.58521253	774.6373	C44H88O7N1P1	PC 36:1e
874	LP_0007559	34.41531678	0.190432331	992.8621	C64H110O6	TAG 61:7
875	LN_0003874	68.41900236	43.30520782	131.0703	C6H12O3	3-Hydroxy-3-methylvaleric acid
876	LP_0006262	91.7156003	2.906146464	173.0921	C7H12N2O3	L-Prolylglycine | Glycylproline | 5-delta-Hydroxybutylhydantoin
877	LP_0008539	52.22097836	27.95276498	872.7697	C55H98O6	TAG 52:4
878	LP_0003434	43.56782569	15.11403286	768.5895	C44H82O7N1P1	PC 36:4e | MePC 35:4e
879	LP_0007539	116.1922582	67.55593026	832.7378	C52H94O6	TAG 49:3
880	LP_0002886	45.56668917	0.186107325	144.0656	C6H9NO3	N-Ethylmaleamic acid
881	LP_0004753	30.00308252	0.170754023	344.1137	C18H17NO6	6-Methoxytecleanthine
882	LP_0008456	136.189804	111.5112769	864.8008	C54H102O6	TAG 51:1
883	LP_0005960	26.61096133	35.86897797	1136.8018	C60H113O18N1	Hex3Cer d42:1
884	LP_0002769	59.66493777	23.73561562	494.3241	C24H48O7N1P1	LysoPC 16:1
885	LP_0008224	81.4888585	12.68867121	832.6631	C48H91O8N1	Hex1Cer d42:2
886	LN_0005819	95.16941998	88.50614254	150.0551	C8H9NO2	Acetoaminophenol
887	LP_0000914	36.68178434	10.75235657	1227.7571	C60H110O23N2	CerG3GNAc1 d44:1
888	LP_0003099	102.5792323	112.6915068	916.8322	C58H106O6	TAG 55:3
889	LN_0003424	157.0123658	2.141716448	297.2435	C18H34O3	(9Z)-(12R)-Hydroxyoctadecenoic acid
890	LP_0006525	60.95528646	16.27660673	723.5401	C41H75O6N2P1	SM d36:5
891	LN_0005847	62.35837458	19.38844139	283.2644	C18H36O2	Stearic acid
892	LN_0002171	55.37816045	49.20395368	339.3268	C22H44O2	Behenic acid
893	LN_0003038	100.8434814	0.998458699	464.3018	C26H43NO6	Glycocholic acid
894	LN_0003090	51.57526064	18.82452751	506.3251	C25H50O7N1P1	LdMePE 18:1
895	LP_0007415	233.3654246	177.8054696	764.6753	C47H86O6	TAG 44:2
896	LN_0004685	774.9151312	64.63961066	181.071	C6H14O6	Mannitol | Sorbitol | Galactitol
897	LP_0001329	59.907067	14.88295268	518.3242	C26H48O7N1P1	LysoPC 18:3
898	LN_0002471	34.40449295	46.39461748	889.581	C47H87O13N0P1	PI 38:2
899	LP_0006207	262.8930419	285.3391901	956.8633	C61H110O6	TAG 58:4
900	LP_0004092	31.41875295	32.80315203	238.165	C10H20O5	15-Crown-5
901	LP_0002998	90.7593283	62.56990335	946.7844	C61H100O6	TAG 58:9
902	LN_0005328	78.09492951	0.341000401	337.2386	C20H34O4	(2E)-5-(5,6-Dihydroxy-1,2,4a,5-tetramethyldecahydro-1-naphthalenyl)-3-methyl-2-pentenoic acid
903	LN_0003186	46.86326477	23.36386003	778.5757	C45H82O7N1P1	PE 40:5e
904	LP_0003250	53.01159516	18.4680339	744.553	C41H78O8N1P1	PC 33:2
905	LN_0002876	81.19542775	167.4284837	191.0343	C10H8O4	Scopoletin
906	LP_0002355	103.7863284	58.42928284	894.7535	C57H96O6	TAG 54:7
907	LP_0003549	64.31086479	27.42416426	792.5527	C45H78O8N1P1	PC 37:6
908	LP_0005984	61.63194074	17.25680994	806.6473	C46H89O8N1	Hex1Cer d40:1
909	LN_0005881	69.75552642	32.71917635	365.3424	C24H46O2	Nervonic acid
910	LP_0006201	322.7447674	300.9054097	958.8787	C61H112O6	TAG 58:3
911	LN_0003011	34.75882567	11.40395607	913.581	C49H87O13N0P1	PI 40:4
912	LP_0005649	42.1708444	0.653845252	774.6001	C43H84NO8P	PE 38:1
913	LP_0007592	101.7721281	30.72128969	223.1076	C11H14N2O3	Glycyl-L-phenylalanine
914	LP_0008500	45.16230908	5.768257998	297.1463	C19H20O3	(E)-1,7-Bis(4-hydroxyphenyl)hept-1-en-3-one
915	LP_0008636	64.91817233	1.261106233	880.7379	C56H94O6	TAG 53:7
916	LP_0006516	71.53057601	34.58259608	910.7854	C58H100O6	TAG 55:6
917	LP_0007528	122.860442	56.83958906	838.7846	C52H100O6	TAG 49:0
918	LP_0007308	142.2422795	0.61334399	1071.0036	C69H128O6	TAG 66:3
919	LN_0003095	81.86599109	0.686386787	498.2897	C26H45NO6S	Taurochenodeoxycholic acid
920	LP_0001580	47.21290334	15.90336789	794.6037	C44H86O7N1P1	MePC 35:2e
921	LN_0002166	46.60550174	12.22777913	794.5701	C45H82O8N1P1	dMePE 38:4
922	LP_0008616	89.00437968	63.23435542	886.7851	C56H100O6	TAG 53:4
923	LP_0001372	50.67073145	20.13123856	572.371	C30H54O7N1P1	LysoPC 22:4
924	LN_0001374	63.66701056	34.05836401	750.5443	C43H78O7N1P1	PE 38:5e | PE 38:4p
925	LP_0003648	130.5661006	16.66501138	840.647	C48H90O8N1P1	PC 40:3
926	LN_0004268	30.03005544	34.8931361	335.0335	C16H13ClO6	7-Chloro-2prime-hydroxy-4,6-dimethoxy-6prime-methyl-3H,4primeH-spiro[1-benzofuran-2,1prime-cyclohexa[2,5]diene]-3,4prime-dione
927	LP_0003137	154.566563	59.43861987	130.1592	C8H19N	Octylamine
928	LN_0002218	67.7942894	0.543945786	241.0865	C15H14O3	Equol
929	LP_0001117	34.4915185	0.480600827	680.6909	C44H89O3N1	Cer d44:0
930	LP_0007532	123.3656269	79.61981878	836.7697	C52H98O6	TAG 49:1
931	LP_0006511	18.02326661	0.088302015	745.5848	C41H81O7N2P1	SM t36:2
932	LP_0007469	53.31821	0.332523903	517.3307	C26H45NO6S	Taurodeoxycholic acid
933	LN_0005094	34.9094834	0.129470511	271.0614	C15H12O5	Naringenin
934	LP_0002149	62.2438087	47.87586236	746.5689	C41H80O8N1P1	PE 36:1
935	LP_0001380	52.65702771	18.67792725	608.4646	C32H66O7N1P1	LysoPC 24:0
936	LP_0002999	58.89939937	250.9872877	976.9253	C62H118O6	TAG 59:1
937	LN_0005290	88.66296124	0.767398487	453.3952	C28H54O4	OAHFA 28:0
938	LP_0008650	107.6409293	105.0001386	904.832	C57H106O6	TAG 54:2
939	LN_0002545	51.05519657	22.33805151	833.5188	C43H79O13P	PI 34:2
940	LP_0003332	35.21794348	7.796802083	758.5691	C42H80O8N1P1	PC 34:2
941	LP_0008496	99.87304502	41.63221586	856.7378	C54H94O6	TAG 51:5
942	LP_0000770	90.26059239	0.334707099	367.1223	C12H24O11	Lactitol | Cellobiitol
943	LP_0008225	42.88566997	14.48193591	862.6238	C46H87O13N1	Hex2Cer d34:1
944	LP_0006021	43.10968248	14.36066714	1024.677	C52H97O18N1	Hex3Cer d34:1
945	LN_0003822	71.17932289	0.166142527	497.3644	C32H50O4	3-Acetoxyurs-12-en-23-oic acid
946	LP_0008337	40.83148265	13.19978996	860.6082	C46H85O13N1	Hex2Cer d34:2
947	LP_0003289	44.12700145	12.7251082	746.6046	C42H84O7N1P1	PC 34:1e
948	LP_0001933	57.4047586	22.5515858	636.6649	C42H85O2N1	Cer m42:0
949	LN_0002283	53.32118105	0.227861048	199.1697	C12H24O2	Lauric acid
950	LP_0003367	45.69036321	16.99234137	742.5736	C42H80O7N1P1	PC 34:3e
951	LP_0008454	107.4862183	110.1284741	866.8162	C54H104O6	TAG 51:0
952	LP_0001647	38.67640149	13.1206786	341.1725	C21H24O4	3-[(E)-2-(3-Hydroxy-4-methoxyphenyl)vinyl]-5-methoxy-2-(3-methyl-2-buten-1-yl)phenol
953	LN_0001612	60.57089974	20.86428384	596.5261	C35H69O3N1	Cer d35:1
954	LP_0008521	70.33070683	36.49977374	876.8009	C55H102O6	TAG 52:2
955	LP_0008200	37.52699968	30.38663753	728.6024	C42H81NO8	GlcCer d36:1
956	LP_0006563	56.80967987	20.041955	813.6838	C47H93O6N2P1	SM d42:2
957	LN_0000210	102.0845998	42.50814002	253.2172	C16H30O2	Palmitoleic acid | (Z)-14-Methylpentadec-6-enoic acid
958	LN_0005831	83.49392825	40.75370509	277.2174	C18H30O2	Gamolenic acid (FA 18:3) | Linolenic acid
959	LP_0008015	40.80158232	8.053581922	698.5567	C40H75O8N1	Hex1Cer d34:2
960	LN_0002395	133.5625248	26.70881955	311.2958	C20H40O2	Arachidic acid
961	LP_0001316	107.4680151	32.32003502	123.0555	C6H6N2O	Nicotinamide
962	LP_0006709	228.992985	236.3423633	986.9101	C63H116O6	TAG 60:3
963	LP_0003005	178.3942788	129.0909655	972.8942	C62H114O6	TAG 59:3
964	LP_0000638	62.21386974	59.38264097	616.5634	C38H75O3N1	Cer d38:1
965	LP_0007354	94.63543935	60.03014958	924.8025	C59H102O6	TAG 56:6
966	LP_0003808	36.40058664	0.071212432	828.4795	C42H66O15	(2S,3S,4S,5R,6R)-6-[[(3S,4R,6aR,6bS,8aS,14bR)-4-(Hydroxymethyl)-4,6a,6b,11,11,14b-hexamethyl-8a-[(2S,3R,4S,5S,6R)-3,4,5-trihydroxy-6-(hydroxymethyl)oxan-2-yl]oxycarbonyl-1,2,3,4a,5,6,7,8,9,10,12,12a,14,14a-tetradecahydropicen-3-yl]oxy]-3,4,5-trihydroxyoxane-2-carboxylic acid
967	LP_0005577	57.47269591	19.6075198	868.6781	C50H94NO8P	PC 42:3
968	LP_0000227	45.05539918	0.189929109	654.6021	C40H79NO5	Cer t40:1O
969	LP_0005105	121.8595577	29.14288796	134.1176	C6H15NO2	Bis(2-hydroxypropyl)amine
970	LP_0002767	43.61279509	16.81774068	510.3556	C25H52O7N1P1	LysoPC 17:0
971	LP_0006538	49.56970286	19.1924354	785.6526	C45H89O6N2P1	SM d40:2
972	LP_0002292	78.47596985	54.25560007	948.7998	C61H102O6	TAG 58:8
973	LP_0008424	120.4600279	96.37045521	844.7382	C53H94O6	TAG 50:4
974	LP_0007999	44.46779518	16.43173903	828.6914	C48H93O9N1	Hex1Cer d42:1O
975	LP_0008292	41.47712753	15.33276445	808.6657	C48H89O8N1	Hex1Cer d42:3
976	LP_0000225	61.65689352	28.00269354	620.5972	C40H77O3N1	Cer d40:2
977	LP_0007377	88.07342853	57.20210131	896.7694	C57H98O6	TAG 54:6
978	LP_0004410	108.8203815	0.97282441	423.1773	C25H26O6	3-[(7S,8S)-5-Hydroxy-2,2,7,8-tetramethyl-6-oxo-7,8-dihydropyrano[3,2-g]chromen-10-yl]-3-phenylpropanoic acid
979	LP_0005992	49.82296597	18.02581459	700.5717	C40H77O8N1	Hex1Cer d34:1
980	LP_0000941	68.20375326	27.6711677	624.6287	C40H81O3N1	Cer d40:0
981	LP_0005733	54.89900188	26.26821054	776.5581	C45H78O7N1P1	PE 40:6p
982	LP_0005276	51.74713985	22.60408465	622.613	C40H79O3N1	Cer d40:1
983	LN_0003102	34.98746181	41.45730122	528.3093	C27H48O7N1P1	LdMePE 20:4
984	LP_0003248	68.00821834	58.40344702	728.5219	C40H74NO8P	PC 32:3
985	LP_0001378	53.66218556	22.84273026	568.3396	C30H50O7N1P1	LysoPC 22:6
986	LP_0005614	45.33813021	65.36068502	726.5031	C40H72NO8P	PE 35:4
987	GC_984	89.11444551	21.23372306		C5H10N2O3	Glutamine
988	GC_774	55.68926794	13.4195196		C6H8O2	1,2-Cyclohexanedione
989	GC_442	61.33102946	34.64452387		C5H9NO4	L-Glutamic acid
990	GC_536	62.65268934	13.82394663		C6H5NO2	Picolinic acid
991	GC_414	79.42788385	19.91715184		C9H18O2	Pelargonic acid
992	GC_859	115.218476	29.9365849		C4H11NS	3-Methylthiopropylamine
993	GC_430	40.93814311	15.66733627		C3H7NO3	Serine
994	GC_60	44.51190358	13.79614648		C6H7NO	2-Aminophenol
995	GC_467	33.27111715	23.79318717		C6H10O3	alpha-Ketoisocaproic acid
996	GC_433	27.34315787	11.19774756		C9H11NO3	Tyrosine
997	GC_1042	59.42723321	43.74589444		C7H12O5	(2R,3S)-2-Hydroxy-3-isopropylbutanedioic acid
998	GC_699	110.611515	80.422159		C16H30O2	Palmitoleic acid
999	GC_350	89.58197417	14.50195742		C3H7NO2	Alanine
1000	GC_439	94.34486498	44.2452067		C6H12N2O4S2	Cystine
1001	GC_1080	141.0030838	37.31872584		C6H14N2O2	Lysine
1002	GC_153	71.25016799	6.596924922		C6H10O3	4-Acetylbutyric acid
1003	GC_353	14.16476377	8.352113369		CH4N2O	Urea
1004	GC_1075	23.62791167	14.15100284		C3H6O3	Lactic acid
1005	GC_1098	31.41361984	16.37977804		C15H30O2	Pentadecanoic acid
1006	GC_1096	62.37234788	46.12601992		C18H34O2	Elaidic acid
1007	GC_1092	68.1572761	7.559255148		C21H42O4	Monostearin
1008	GC_431	141.9160489	46.69047614		C11H12N2O2	Tryptophan
1009	GC_427	37.11594031	15.03030318		C9H11NO2	Phenylalanine
1010	GC_1086	68.0756878	30.3840827		C6H12O6	myo-Inositol
1011	GC_858	72.48000967	17.8967501		C5H5NO2	Pyrrole-2-carboxylic acid
1012	GC_1103	55.96327175	39.04201543		C3H4O3	Pyruvic acid
1013	GC_241	131.9248202	68.85329395		C5H9NO3	trans-4-Hydroxy-L-proline
1014	GC_959	68.22270944	21.66255384		C4H8N2O3	Asparagine
1015	GC_819	116.6681686	70.02088071		C9H10O3	3-Phenyllactic acid
1016	GC_352	31.92601527	13.29257476		C5H11NO2	Valine
1017	GC_1101	103.5623525	58.36671546		C5H10O5	Xylose
1018	GC_1090	57.35344713	19.65995728		C3H5NO4	Aminomalonic acid
1019	GC_1108	54.29861023	4.256449319		C5H10O3	2-Hydroxyvaleric acid
1020	GC_1028	41.64073395	16.95950222		C6H13NO2	Isoleucine
1021	GC_589	61.63545561	20.09857046		C6H10O4	2,3-Dimethylsuccinic acid
1022	GC_378	85.12744574	35.86384083		C19H26O3	7-Hydroxy-4-androstene-3,17-dione
1023	GC_556	96.1350998	55.96060282		C5H12O5	D-Arabitol
1024	GC_344	124.4383073	98.95829484		C5H12O5	Ribitol
1025	GC_456	136.4959133	137.4388175		C3H8O3	Glycerol
1026	GC_428	111.6422333	41.26242891		C5H9NO2	Proline
1027	GC_1319	80.78711862	19.36127421		C4H8N2O3	Glycylglycine
1028	GC_957	41.86449231	27.9294192		C6H12O5	1,5-Anhydroglucitol
1029	GC_1093	123.4149895	24.16100085		C19H38O4	1-Monopalmitin
1030	GC_1099	82.19478219	18.20984749		C7H6O2	Benzoic acid
1031	GC_388	42.35562722	10.32053831		C5H7NO3	Oxoproline
1032	GC_151	90.33752061	15.55264914		C4H9NO2	3-Aminoisobutyric acid
1033	GC_147	133.8737245	99.12645883		C12H22O11	Sucrose
1034	GC_365	51.30456737	20.14204156		C27H46O	Cholesterol
1035	GC_360	50.03940383	30.48352901		C6H12O6	Glucose
1036	GC_1310	46.16797225	20.26307203		C24H58O8Si6	Glucaric acid
1037	GC_950	92.25230989	37.73100406		C5H12N2O2	Ornithine
1038	GC_420	50.27585404	20.15850287		C5H11NO2S	Methionine
1039	GC_332	50.03940383	30.48850815		C6H12O6	D-Talose
1040	GC_484	353.5614645	33.93812415		C12H22O11	Cellobiose
1041	GC_387	72.82976105	33.67503937		C5H9NO4	Glutamic acid
1042	GC_1105	32.59638389	4.269892039		C4H8O3	2-Hydroxybutanoic acid
1043	GC_481	184.6022859	150.3577307		C8H16O2	Caprylic acid
1044	GC_728	113.044216	68.84004659		C4H8N2O3	3-Ureidopropionate
1045	GC_584	56.11016338	16.09943936		C5H5NO2	2,3-Dihydroxypyridine
1046	GC_1081	76.76971969	35.79117598		C4H8O5	Threonic acid
1047	GC_393	51.25671754	19.23385121		C4H4O4	Fumaric acid
1048	GC_391	47.76861073	20.89583351		C4H9NO3	Threonine
1049	GC_160	58.86817148	21.97175188		C6H13N3O3	Citrulline
1050	GC_1078	203.5438678	52.74810883		C6H12O6	Fructose
1051	GC_1229	87.84562255	33.57332104		C6H11N3	1-Methylhistamine
1052	GC_1087	67.12736342	28.34993835		C6H13O9P	Glucose 1-phosphate
1053	GC_1071	21.29834211	7.907008809		C6H12O7	Gluconic acid
1054	GC_1089	56.61516916	28.7545103		C3H9O6P	D-(Glycerol 1-phosphate)
1055	GC_514	35.71577729	19.78614982		C3H6O4	D-Glyceric acid
1056	GC_354	46.23840113	20.38098589		C2H5NO2	Glycine
1057	GC_1358	21.29343865	7.89241795		C6H14O6	L-Iditol
1058	GC_635	78.59574136	11.24529811		C5H11NO2	5-Aminovaleric acid
1059	GC_1100	79.08217988	27.04838668		C6H5NO2	Nicotinic acid
1060	GC_890	41.74631269	16.29580234		C6H13NO2	Leucine
1061	GC_309	57.36710723	20.26679221		C16H34	Hexadecane
